# Supplementary material for: Bromine radical release from a nickel-complex facilitates the activation of alkyl boronic acids: a boron selective Suzuki–Miyaura cross coupling
Source: Royal Society of Chemistry journal article supplement (doi:10.1039/d4sc04196h), 2024-01-01
Supplement: d4sc04196h1.pdf [file d4sc04196h1.pdf]

## Supporting information

### Bromine Radical Release from Nickel-Complex Facilitates the Activation of Alkyl Boronic Acids: A Boron Selective Suzuki-Miyaura Cross Coupling

Monica Oliva,<sup>a</sup> Serena Pillitteri,<sup>a</sup> Johannes Schörghener,<sup>b</sup> Riku Saito,<sup>c</sup> Erik V. Van der Eycken<sup>a,d</sup> and Upendra K. Sharma<sup>a,e,\*</sup>

<sup>a</sup>Laboratory for Organic & Microwave-assisted Chemistry (LOMAC)  
Department of Chemistry, KU Leuven Celestijnenlaan 200F, 3001 Leuven, Belgium

<sup>b</sup>Department of Chemistry, University of Zurich  
Winterthurerstrasse 190, CH-8057 Zurich, Switzerland

<sup>c</sup>Department of Chemistry and Centre for Sustainable Chemistry, Ghent University, Krijgslaan 281 (S3), 9000 Ghent, Belgium

<sup>d</sup>People's Friendship University of Russia (RUDN University),  
Miklukho-Maklaya street 6, RU-117198 Moscow, Russia.

<sup>e</sup>Department of Chemistry and Biochemistry, University of Missouri-St. Louis, One University Boulevard, St. Louis, MO 63121, USA. E-mail: sharmauk@umsl.edu

#### Contents

|                                                                                                           |    |
|-----------------------------------------------------------------------------------------------------------|----|
| 1. General information.....                                                                               | 2  |
| 2. Reaction optimization.....                                                                             | 3  |
| 3. NiBr <sub>2</sub> ·dtbbpy synthesis and characterization.....                                          | 6  |
| 4. Mechanistic investigations.....                                                                        | 7  |
| 4.1 NMR Experiments.....                                                                                  | 7  |
| 4.2 Stern-Volmer Emission Quenching Experiments.....                                                      | 10 |
| 4.3 Cyclovoltammetry experiment.....                                                                      | 13 |
| 4.4 Miscellaneous.....                                                                                    | 15 |
| Bromine effect on the reaction kinetics.....                                                              | 15 |
| Giess-type addition.....                                                                                  | 16 |
| 5. Photocatalyzed Suzuki-Miyaura reaction.....                                                            | 16 |
| General procedure using haloarenes and triflates as substrates.....                                       | 16 |
| <b>Tested substrates excluded from the study using bromo arene as starting material in batch</b><br>..... | 17 |
| General procedure using acylchlorides as substrates.....                                                  | 17 |
| 6. Spectral data for new compounds.....                                                                   | 18 |
| 7. DFT calculations.....                                                                                  | 53 |
| 7.1. General information.....                                                                             | 53 |
| 7.2 Results.....                                                                                          | 54 |
| 7.3 Energies and coordinates of calculated structures.....                                                | 58 |
| References.....                                                                                           | 73 |

## 1. General information

### MATERIALS

Unless otherwise noted, all commercially available compounds were used as received without further purification.

### INSTRUMENTATIONS

NMR spectra were recorded on a BRUKER Avance III HD 400 using the solvent peak as internal reference for the chemical shifts of the reported  $^1\text{H}$  and  $^{13}\text{C}$  nuclei ( $\text{CDCl}_3$ :  $\delta$  ( $^1\text{H}$ ) = 7.26,  $\delta$  ( $^{13}\text{C}$ ) = 77.16. Multiplicities of signals are reported as s (singlet), d (doublet), t (triplet), q (quartet), quint (quintet), sept (septet), m (multiplet) and combinations of these multiplicities. Coupling constants  $J$  are reported in Hz. All coupling constants  $J$  reported refer to JHH couplings, if not stated otherwise. Spectra of  $^{13}\text{C}$  nuclei were recorded  $^1\text{H}$ -decoupled. The applied solvents are specified in the descriptions of the corresponding experiments.

Product isolation was performed using silica (60, F254, Merck<sup>TM</sup>), and TLC analysis was performed using Silica on aluminium foils TLC plates (F254, Supelco Sigma-Aldrich<sup>TM</sup>) with visualization under ultraviolet light (254 nm) and appropriate TLC staining, mainly potassium permanganate and Seebach staining solution.

Cyclic voltammetry measurements were performed with Metrohm PGSTAT20 potentiostat/galvanostat equipped with a glassy carbon electrode as working electrode and platinum wire as counter electrode. Ag/AgCl (Silver wire in an aqueous 3 M KCl electrolyte) was used as pseudo reference electrode. A 0.1 M solution of tetrabutylammonium hexafluorophosphate was applied as supporting electrolyte. The scan rate was set to 150 mV/s. Solutions were degassed with argon prior to measurement and experiments were performed under an atmosphere of argon.

Stern-Volmer experiments were obtained on a FLS 920, Edinburgh Fluorescence Spectrometer.

Photochemical experiments were performed magnetically stirred in 10 mL glass test tubes with screw caps equipped with silicon septa. The tubes were irradiated with a blue Kessil light (456 nm, 40W) in an EvoluChem<sup>TM</sup> PhotoRedOx Box. To maintain a constant reaction temperature of 40°C, the fan of the setup was turned off (Figure S1).

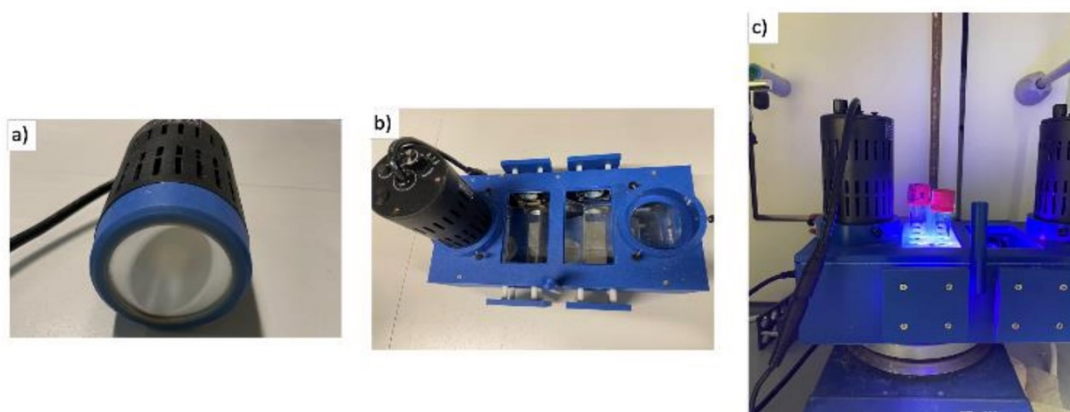

**Figure S1:** a) Kessil light; b,c) Set up using EvoluChem<sup>TM</sup> PhotoRedOx Box.

## 2. Reaction optimization

To a 10 mL reaction vial equipped with a stir bar was added methyl 4-bromobenzoate, **1a** (21.5 mg, 0.1 mmol, 1 equiv), cyclopentylboronic acid, **2a** (17.1 mg, 1.5 equiv), the appropriate photocatalyst (0.0025 mmol, 0.025 equiv if metal based; 0.005 mmol, 0.05 equiv if organic dye), the appropriate nickel complex (from 0.005 mmol, 0.05 equiv to 0.01 mmol, 0.1 equiv) and cesium carbonate (from 0.1 mmol, 1 equiv to 0.3 mmol, 3 equiv). The vial was sealed with a cap containing a TFE-lined silicone septa and was evacuated and purged with argon three times via an inlet needle. The vial was then charged with an appropriate anhydrous solvent (0.1M, 1 mL). After this, the vial was irradiated in the PhotoRedox BOX reactor with Kessil light 456 nm. The temperature of the reaction was maintained at approximately 40 °C. After 18 h, the solvent was evaporated and 3,4,5-trimethoxybenzaldehyde used as internal standard for <sup>1</sup>H NMR analysis.

**Table S1: Solvent screening for photoredox-catalyzed Suzuki-Miyaura reaction**

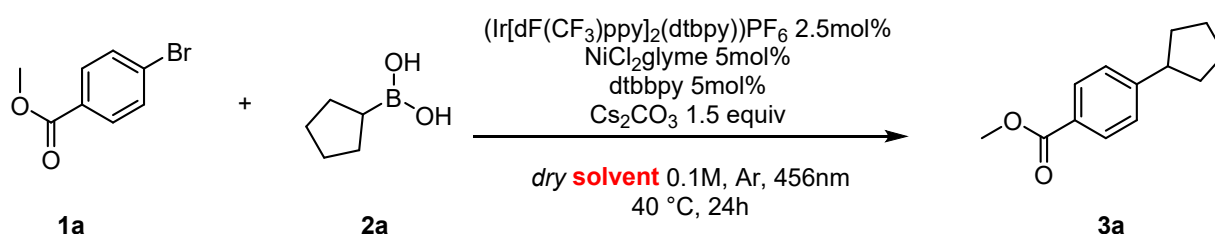

| Entry | Solvent                       | Yield% |
|-------|-------------------------------|--------|
| 1     | DMA Dimethylacetamide         | 41     |
| 2     | DMF Dimethylformamide         | 38     |
| 3     | DMSO Dimethyl sulfoxide       | 60     |
| 4     | DCM Dichloromethane           | 23     |
| 5     | DCE Dichloroethane            | 23     |
| 6     | PhCl Chlorobenzene            | 33     |
| 7     | CH <sub>3</sub> Cl Chloroform | n.r.   |
| 8     | Acetone                       | 18     |
| 9     | 1,4-dioxane                   | 41     |
| 10    | MeOH Methanol                 | n.r.   |
| 11    | Toluene                       | 25     |
| 12    | NMP N-Methyl-2-pyrrolidone    | 17     |

\* The amide based solvents (DMA, DMF, DMSO) are known to interact with BAs.

**Table S2: Base screening for photoredox-catalyzed Suzuki-Miyaura reaction**

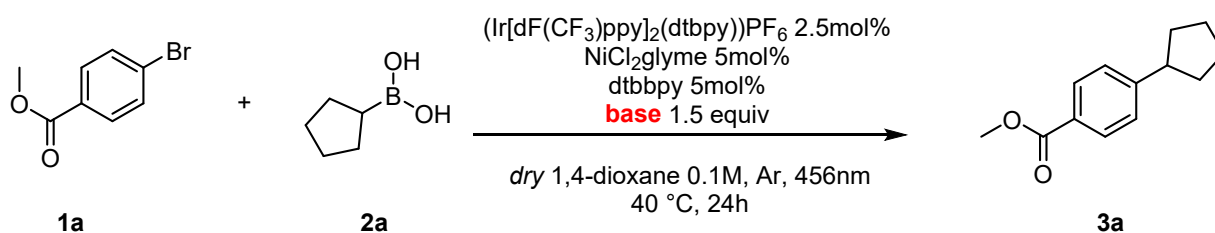

| Entry | Base                                         | Yield%          |
|-------|----------------------------------------------|-----------------|
| 1     | Cs <sub>2</sub> CO <sub>3</sub>              | 41              |
| 2     | Na <sub>2</sub> CO <sub>3</sub>              | n.r.            |
| 3     | K <sub>2</sub> CO <sub>3</sub>               | n.r.            |
| 4     | CaCO <sub>3</sub>                            | n.r.            |
| 5     | CsF                                          | n.r.            |
| 6     | CsOAc                                        | n.r.            |
| 7     | CsBr                                         | traces          |
| 8     | Na <sub>2</sub> HPO <sub>4</sub>             | n.r.            |
| 9     | K <sub>3</sub> PO <sub>4</sub>               | 38 <sup>a</sup> |
| 10    | Cs <sub>2</sub> CO <sub>3</sub> + 18-Crown-6 | 5 <sup>a</sup>  |

a. Isolated yield.

Table S3: Optimization of Cs<sub>2</sub>CO<sub>3</sub> equivalents

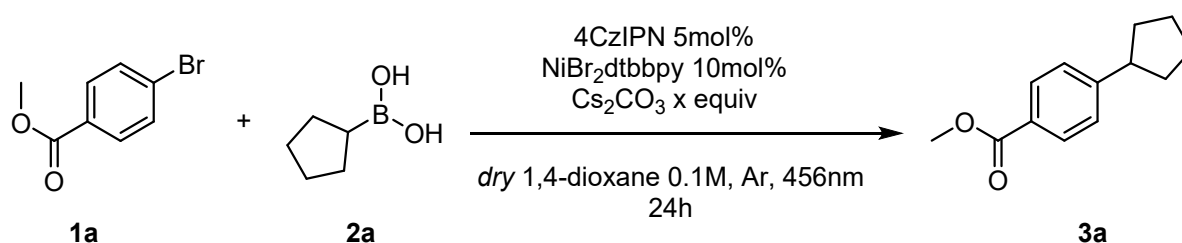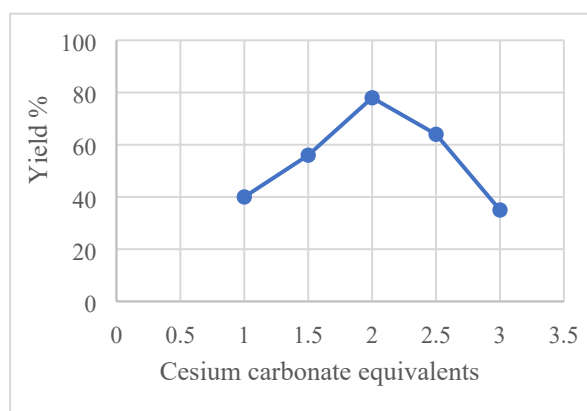

| Entry | Equiv | Yield%* |
|-------|-------|---------|
| 1     | 1     | 40      |
| 2     | 1.5   | 56      |
| 3     | 2     | 78      |
| 4     | 2.5   | 64      |
| 5     | 3     | 35      |

\* GC-MS yield using 3,4,5-trimethoxy benzene as internal standard.

Table S4: Ligand screening for photoredox-catalyzed Suzuki-Miyaura reaction

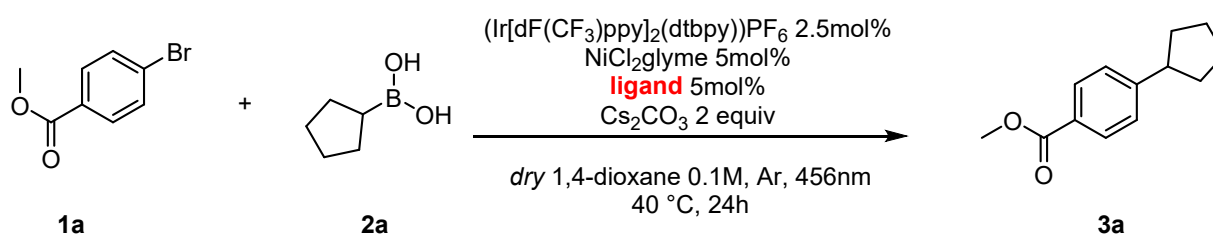

| Entry | Ligand                       | Yield% |
|-------|------------------------------|--------|
| 1     | dtbbpy                       | 41     |
| 2     | 4,4'-Dimethyl-2,2'-dipyridyl | n.r.   |
| 3     | 2,2'-Bipyridyl               | n.r.   |
| 4     | neocuproine                  | 14     |
| 5     | phenanthridine               | n.r.   |
| 6     | phenanthroline               | 20     |
| 7     | bathophenanthroline          | 25     |

**Table S5: Nickel catalyst screening for photoredox-catalyzed Suzuki-Miyaura reaction**

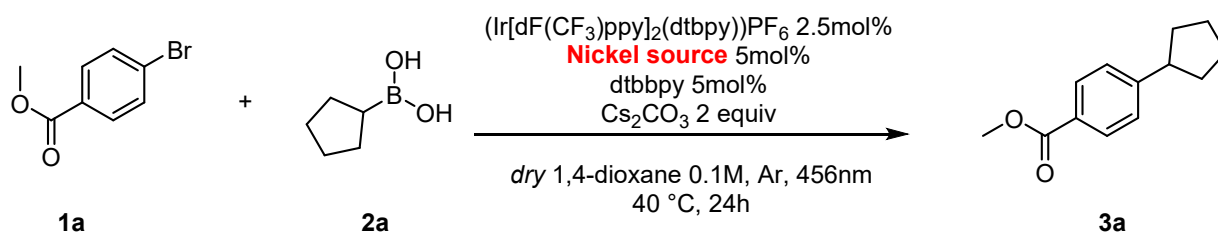

| Entry | Nickel catalyst                             | Yield%          |
|-------|---------------------------------------------|-----------------|
| 1     | NiCl <sub>2</sub> glyme                     | 41              |
| 2     | NiCl <sub>2</sub> · xH <sub>2</sub> O       | 44 <sup>a</sup> |
| 3     | NiBr <sub>2</sub> glyme                     | 63 <sup>a</sup> |
| 4     | NiBr <sub>2</sub> · xH <sub>2</sub> O       | 65              |
| 5     | NiCl <sub>2</sub> glyme + ZnBr <sub>2</sub> | 65              |
| 6     | NiBr <sub>2</sub> glyme 10 mol%             | 64 <sup>a</sup> |
| 7     | NiBr <sub>2</sub> glyme 20 mol%             | 68 <sup>a</sup> |

a. Isolated yield.

**Table S6: Photocatalyst screening for photoredox-catalyzed Suzuki-Miyaura reaction**

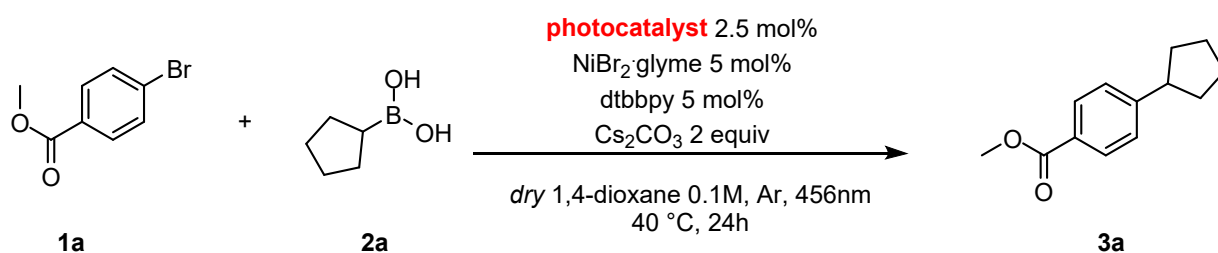

| Entry | Photocatalyst                                                     | Yield%          |
|-------|-------------------------------------------------------------------|-----------------|
| 1     | 9-Mesityl-3,6-di-tert-butyl-10-phenylacridinium tetrafluoroborate | traces          |
| 2     | 9-Mesityl-methylacridinium perchlorate                            | Traces          |
| 3     | 4CzIPN 3 mol% <sup>a</sup>                                        | 60              |
| 4     | 4CzIPN 5 mol% <sup>c</sup>                                        | 78 <sup>b</sup> |
| 5     | [Ir(dtbbpy)(ppy) <sub>2</sub> ](PF <sub>6</sub> )                 | 53              |
| 6     | [Ir(dFCF <sub>3</sub> ppy) <sub>2</sub> (ppy)]PF <sub>6</sub>     | 57              |

a. Nickel glyme b. isolated yield c. Nickel source 10 mol %, dtbbpy 10 mol%

**Table S7: Additive screening for photoredox-catalyzed Suzuki-Miyaura reaction**

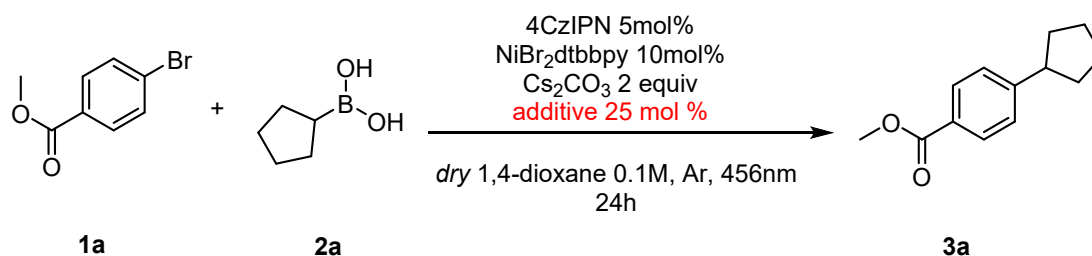

| Entry | Additive          | Yield% |
|-------|-------------------|--------|
| 1     | TBAI              | n.r.   |
| 2     | TBABr             | 90     |
| 3     | TBACl             | 19     |
| 4     | ZnBr <sub>2</sub> | 26     |
| 5     | LiBr              | 26     |

**Table S8: Organic base for photoredox-catalyzed Suzuki-Miyaura reaction**

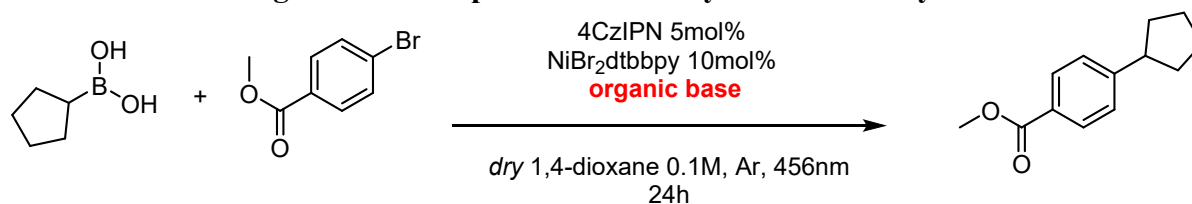

| Entry | Base              | Yield%            |
|-------|-------------------|-------------------|
| 1     | 2,6-lutidine      | n.d.              |
| 2     | Et <sub>3</sub> N | n.d.              |
| 3     | 3-quinoclidinol   | 65 <sup>*b</sup>  |
| 4     | Quinoclidinol     | 20 <sup>b</sup>   |
| 5     | DBU               | 10 <sup>c</sup>   |
| 6     | DIPEA             | 15 <sup>c</sup>   |
| 7     | TMG               | 68 <sup>c,d</sup> |
| 8     | NaOtBu            | 40 <sup>c</sup>   |
| 9     | DABCO             | n.d. (s.m.)       |
| 10    | CyNMe             | n.d.              |

a. 1 equiv. b. 2 equiv. c. 1.5 equiv d. (Ir[dF(CF<sub>3</sub>)ppy]<sub>2</sub>(dtbbpy))PF<sub>6</sub> \*NMR yield 3,4,5-trimethoxybenzaldehyde used as internal standard.

3. NiBr<sub>2</sub>dtbbpy synthesis and characterization

To 250 mL round bottom flask, 5.0 g of nickel(II) bromide trihydrate (18.2 mmol, 1.0 equiv) and 9.95 g of 4,4'-di-tert-butyl-2,2'-bipyridine (36.3 mmol, 2.0 equiv) were added to 100 mL absolute ethanol (20 mL/g). The resulting green suspension was stirred under air at 23°C for 16h. The resulting solution was then concentrated to ~ 10 mL and 90 mL tert-butyl methyl ether (MTBE, 18 mL/g) was slowly added over 1h. The resulting suspension was aged with stirring for 1h then filtered, washed with 20 mL MTBE and dried under vacuum to yield 13.4 g of green solids (97% yield).

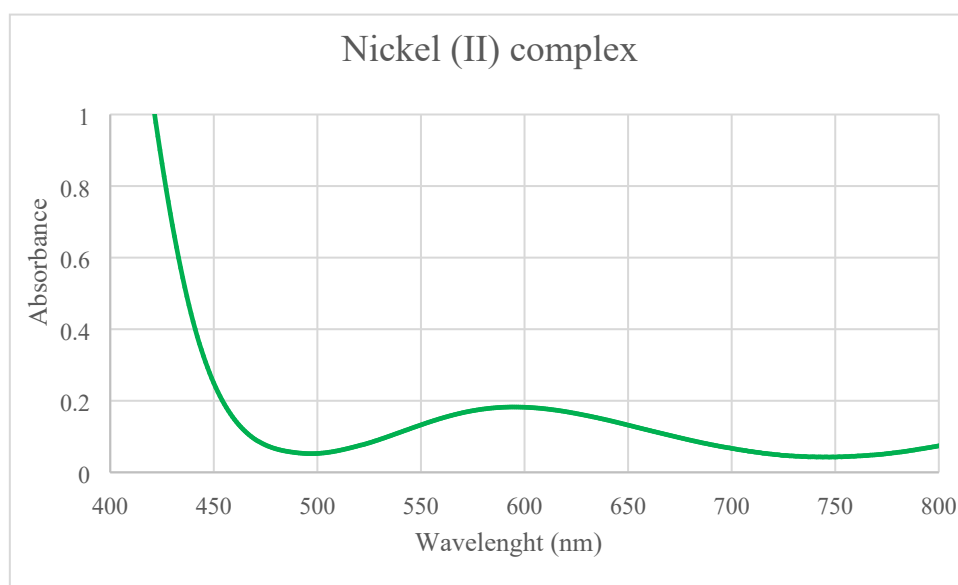

**Figure S2.** UV absorption spectrum for NiBr<sub>2</sub>:dtbbpy solution (5mg/mL DMA).

#### 4. Mechanistic investigations

##### 4.1 NMR Experiments

**Probing the role of Cs<sub>2</sub>CO<sub>3</sub> in the reaction:** To a 5.0 mL reaction vial equipped with a magnetic stirring bar phenethylboronic acid (15.0 mg, 0.10 mmol) and appropriate amount of Cs<sub>2</sub>CO<sub>3</sub> were added. After performing three-cycles vacuum-argon, 0.5 mL of d<sub>3</sub>-Acetonitrile were added. The reaction mixtures were stirred for 4h, filtered and then transferred to a quartz NMR tube for <sup>11</sup>B NMR analysis.

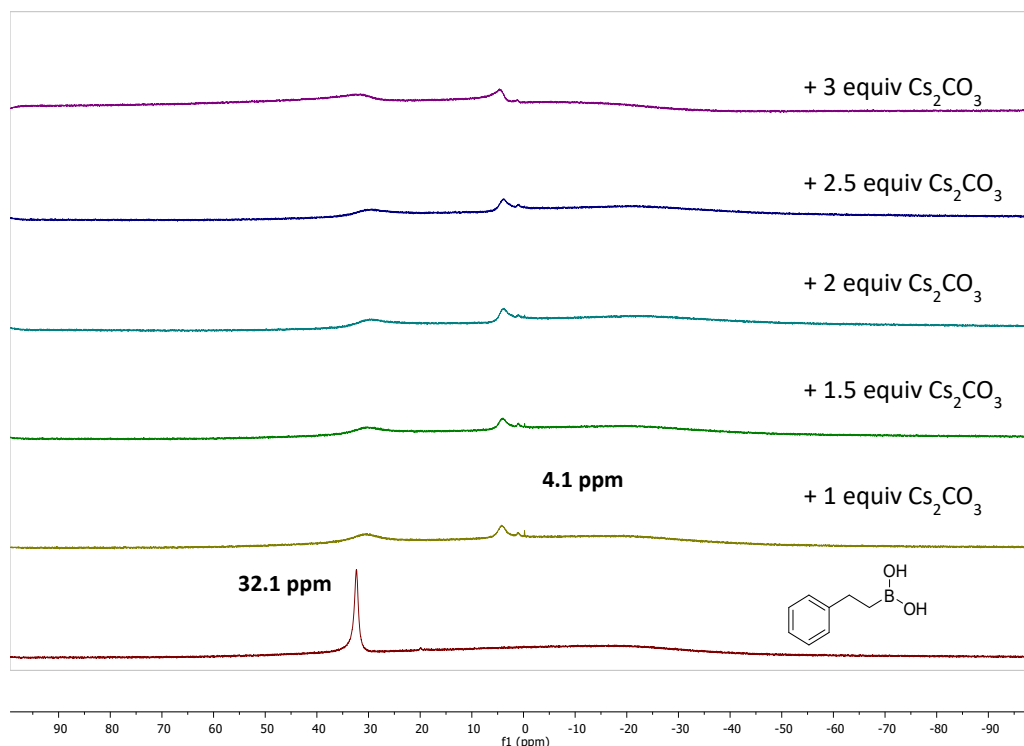

**Figure S3:**  $^{11}\text{B}$  NMR analysis between phenethylboronic acid and  $\text{Cs}_2\text{CO}_3$ .

From Figure S3, it is evident that a new species is formed at 4.1 ppm after adding  $\text{Cs}_2\text{CO}_3$ , while the signal's intensity at 32.1 ppm decreases. Increasing the base amount does not result in an increased intensity of the new boron complex species at 4.1 ppm.

**Complex between 1,4-dioxane and boronic acid:** As shown in Figure S4, by increasing the amount of 1,4-dioxane, the signal of the protons bonded to the boronic acid's oxygens shifts from 4.1 ppm to 4.8 ppm. This indicates hydrogen bonding interactions between the boronic acid and the solvent.



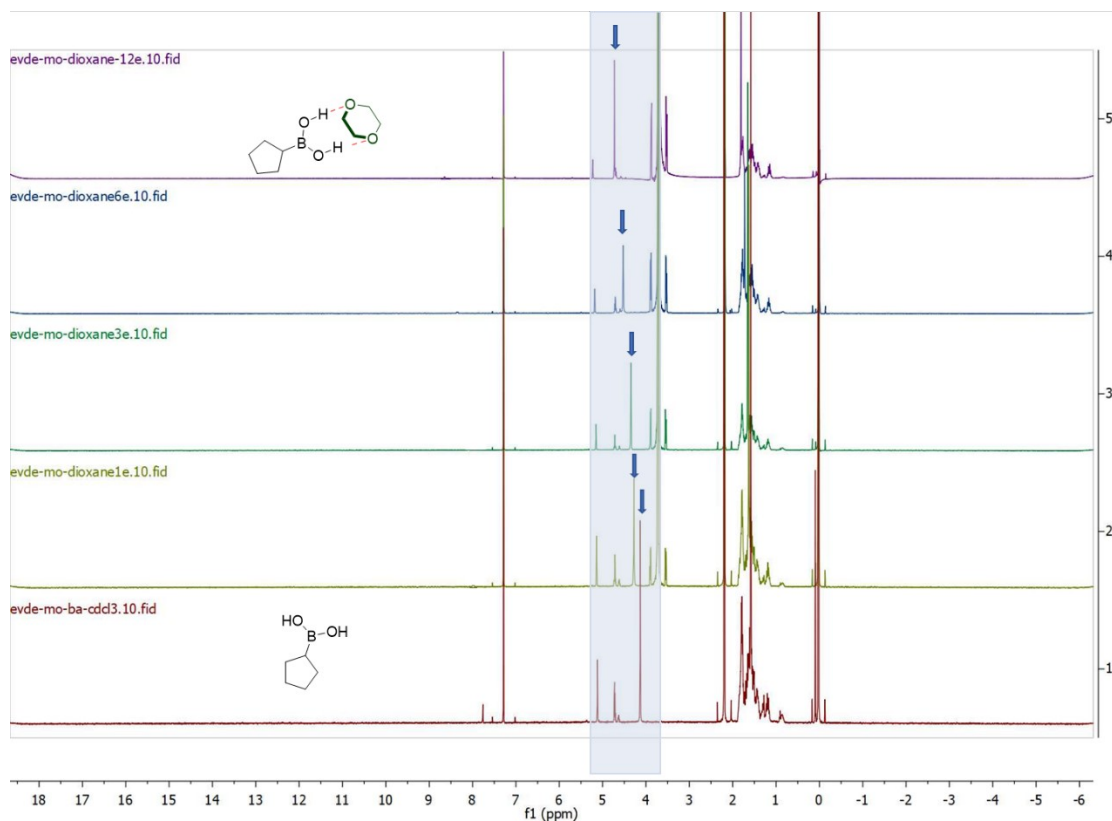

**Figure S4:**  $^1\text{H}$  NMR analysis between cyclopentyl boronic acid and increasing amounts of 1,4-dioxane.

### Detecting the presence of $\text{B}(\text{OH})_3$ in the reaction mixture

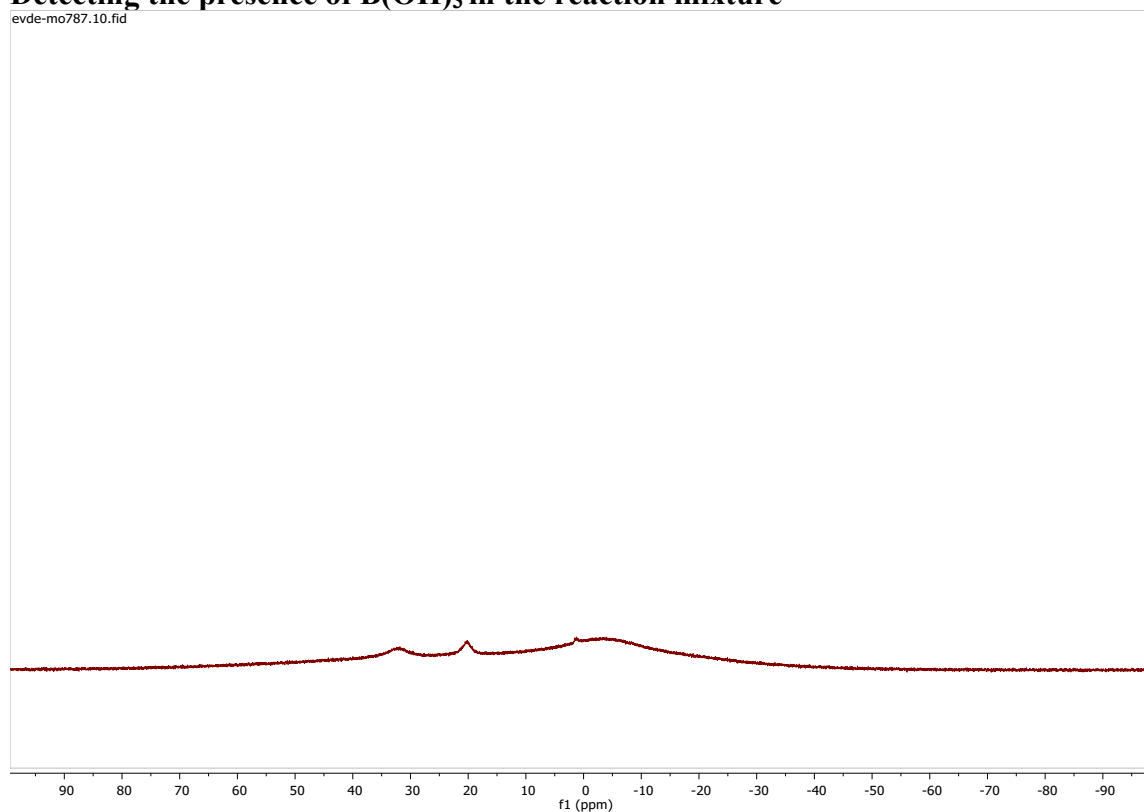

**Figure S5:**  $^{11}\text{B}$  NMR spectrum.  $\text{B}(\text{OH})_3$  detection at 20 ppm. Broad signal in the spectrum arising from the tube.

## 4.2 Stern-Volmer Emission Quenching Experiments

Fluorescence measurements were obtained using UV-Quartz cuvettes (10 mm pathlength) obtained from Hellma Analytics (Cat#: 111-10-40) with home-made silicon septa. Excitation was performed at 435 nm; fluorescence spectra were obtained from 450- 800 nm at medium speed (excitation slit width: 2.5 nm; emission slit width: 5 nm). The relative intensity  $I_0/I$  was calculated as a function of quencher concentration, where  $I_0$  is the luminescence intensity in the absence of quencher, while  $I$  is the intensity in the presence of the quencher. Before each measurement, the solutions were degassed for 60 seconds and kept under nitrogen atmosphere.

The following stock solutions were prepared:

**4CzIPN solution (1.78 mM):** To an oven-dried vial 4CzIPN (4.2 mg, 5.35  $\mu\text{mol}$ ) and acetonitrile were added (3 mL).

**TBABr solution (3.10 mM):** To an oven-dried 2-dram vial TBABr (6.00 mg, 18.6  $\mu\text{mol}$ ) and acetonitrile were added (6.00 mL).

**NiBr<sub>2</sub>dtbbpy solution (2.01 mM):** To an oven-dried vial Ni(II) complex (5mg, 10  $\mu\text{mol}$ ) and acetonitrile were added (5.00 mL).

**Cs<sub>2</sub>CO<sub>3</sub> + BA solution (3.10 mM):** To an oven-dried vial Cs<sub>2</sub>CO<sub>3</sub> (5.8 mg, 18.6  $\mu\text{mol}$ ), ciclopentylboronic acid (2.0 mg, 18.6  $\mu\text{mol}$ ) and acetonitrile were added (6.00 mL). The solution was stirred for one hour and filtered before the measurement.

**1,4-dioxane + BA solution (3.10 mM):** To an oven-dried vial 1,4-dioxane (6  $\mu\text{L}$ , 74.4  $\mu\text{mol}$ ), ciclopentylboronic acid (2.0 mg, 18.6  $\mu\text{mol}$ ) and acetonitrile (6.00 mL) were added.

For each experiment, a 3 mL solution of 4CzIPN in acetonitrile 25 $\mu\text{M}$  has been prepared with increasing concentrations of quenchers.

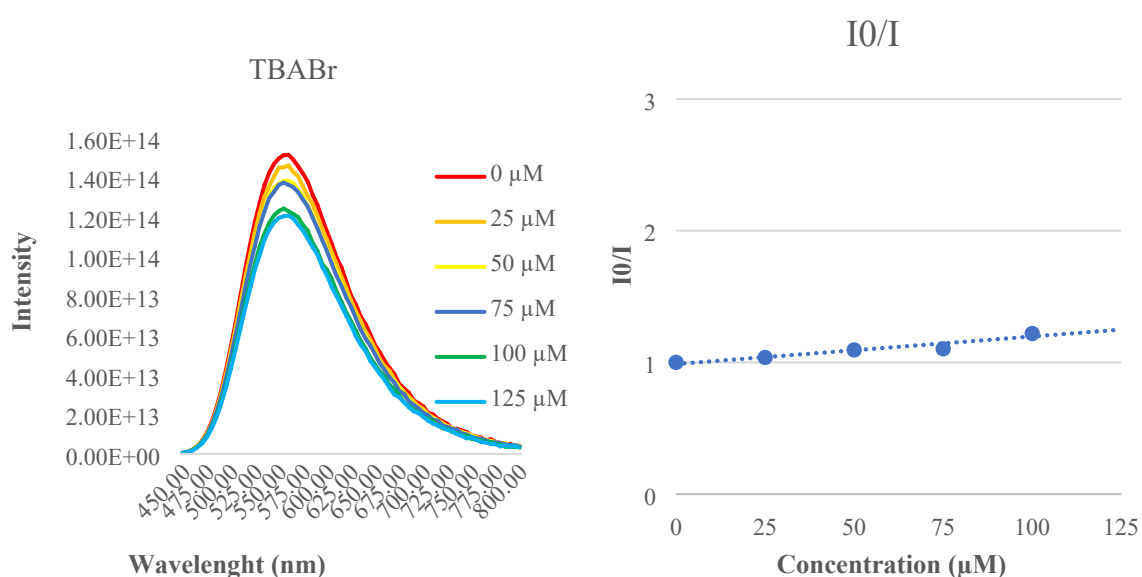

**Figure S6:** Fluorescence of 4CzIPN with TBABr.

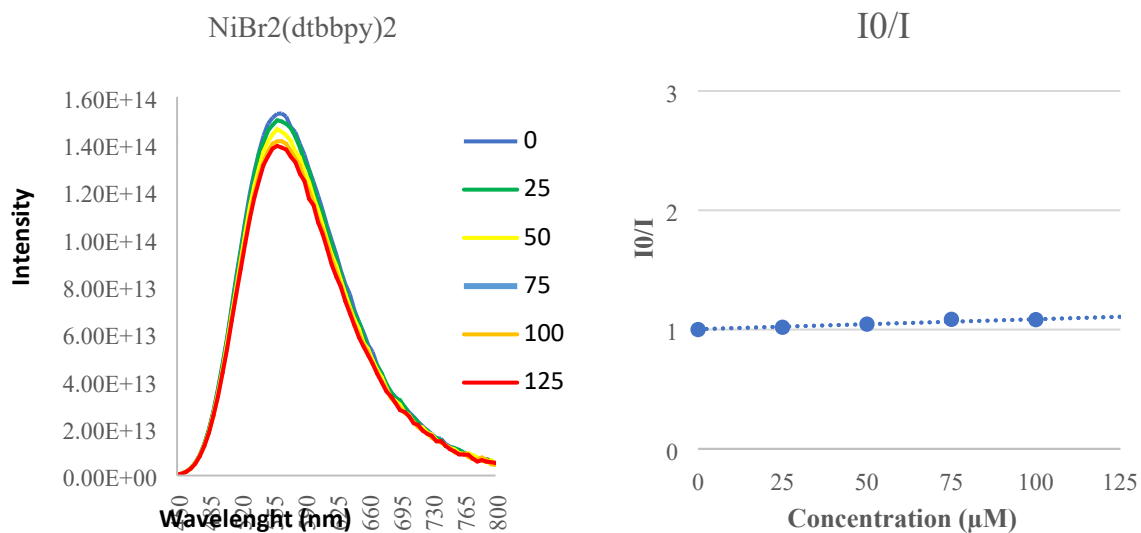

**Figure S7:** Fluorescence of 4CzIPN with NiBr<sub>2</sub>(dtbbpy)<sub>2</sub>.

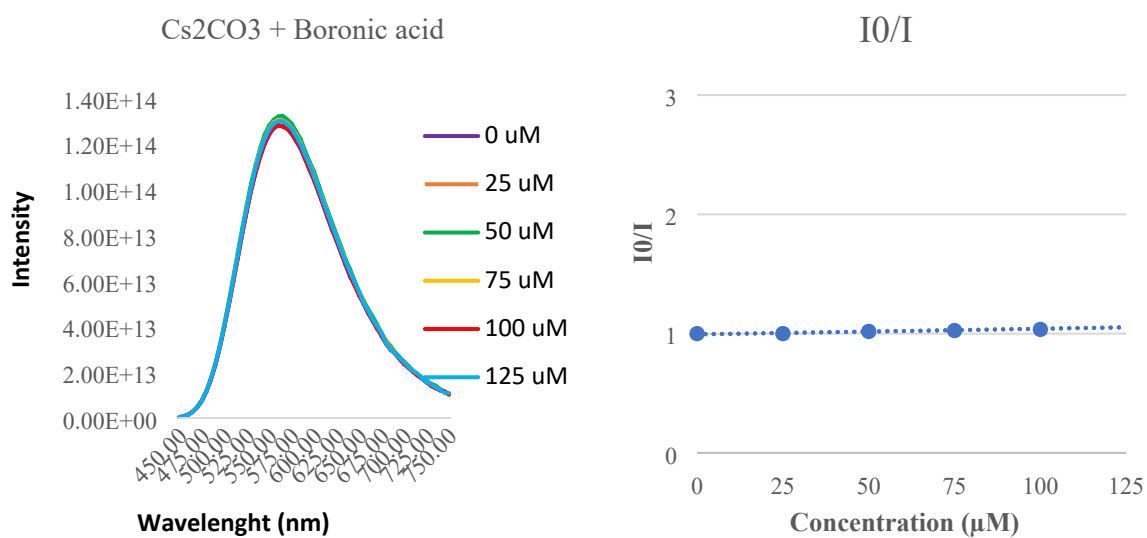

**Figure S8:** Fluorescence of 4CzIPN with Cs<sub>2</sub>CO<sub>3</sub> and cyclopentyl boronic acid.

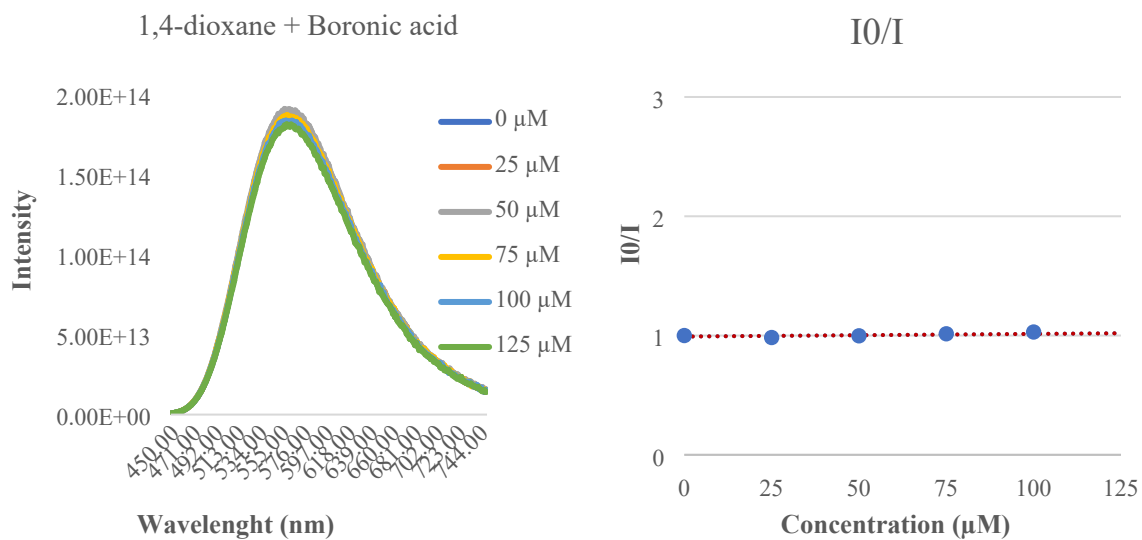

**Figure S9:** Fluorescence of 4CzIPN with 1,4-dioxane and cyclopentyl boronic acid.

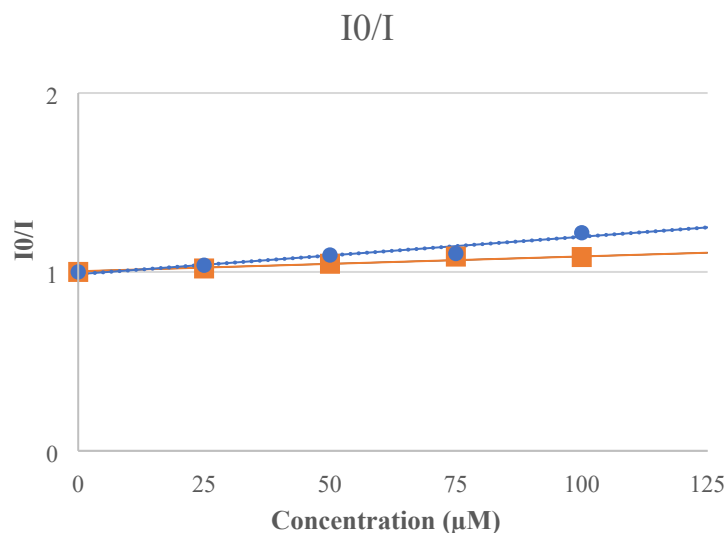

**Figure S10:** Stern Volmer plot for TBABr and NiBr<sub>2</sub>(dtbbpy)<sub>2</sub> quenching experiments.  
4.3 Cyclovoltammetry experiment

Cyclic voltammetry measurements were performed with Metrohm PGSTAT20 potentiostat/galvanostat equipped with a glassy carbon electrode as working electrode and platinum wire as counter electrode. Ag/AgCl (Silver wire in an aqueous 3 M KCl electrolyte) was used as pseudo reference electrode. A 0.1 M solution of tetrabutylammonium hexafluorophosphate was applied as supporting electrolyte. The scan rate was set to 150 mV/s. Solutions were degassed with argon prior to measurement and experiments were performed under an atmosphere of argon.

**TBABr + boronic acid:** Into an oven-dried vial *n*Bu<sub>4</sub>NPF<sub>6</sub> (1.0 mmol, 387 mg), phenethylboronic acid (0.1 mmol, 15 mg) and TBABr (0.25 mmol, 81 mg) were added. Three cycles vacuum-argon were applied. After the addition of *dry* acetonitrile (10 mL), the suspension was stirred for one hour, poured in the electrochemical cell, and degassed prior the measurement. The scan rate is 150 mV/s, ranging from 0 V to 2.5 V.

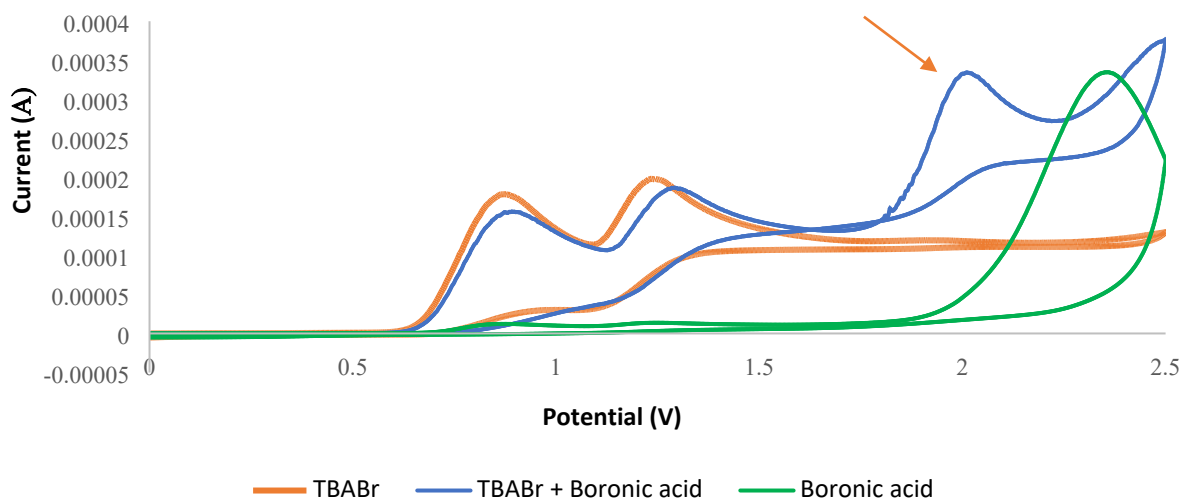

**Cs<sub>2</sub>CO<sub>3</sub> + boronic acid:** Into an oven-dried vial were added *n*Bu<sub>4</sub>NPF<sub>6</sub> (1.0 mmol, 387 mg), phenethylboronic acid (0.1 mmol, 15 mg) and Cs<sub>2</sub>CO<sub>3</sub> (0.25 mmol, 81.4 mg). After applying three cycles vacuum-argon, *dry* acetonitrile (10 mL) was added, and the suspension was stirred for one hour. It was then filtered, poured in the electrochemical cell, and degassed prior the measurement. The scan rate is 150 mV/s, ranging from 0 V to 2.5 V.

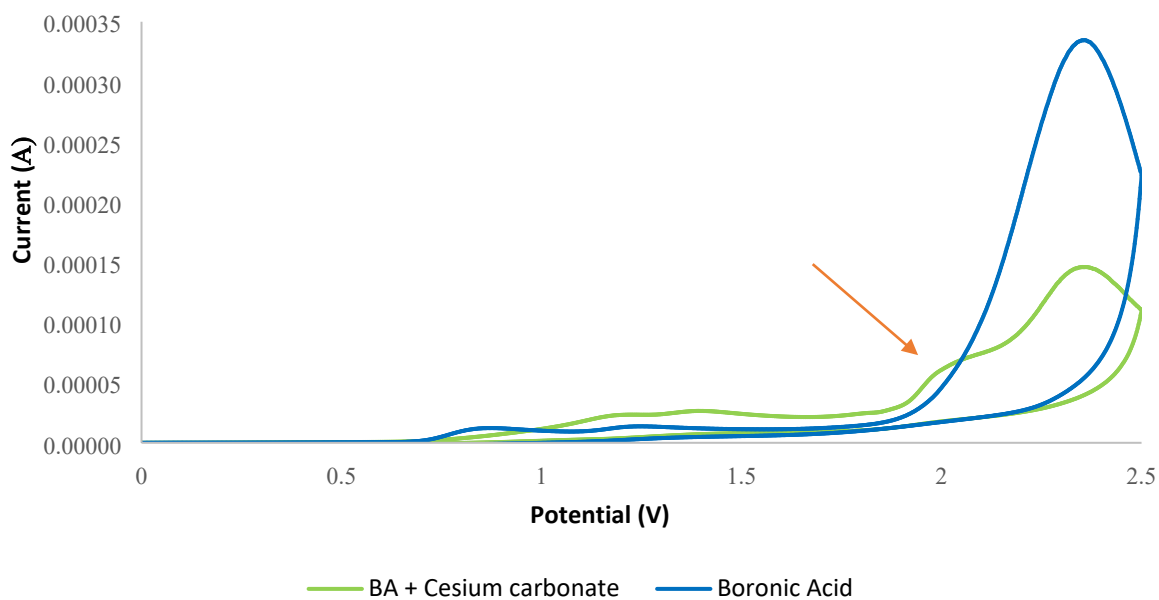

**1,4-dioxane + boronic acid:** Acetonitrile (10 mL) containing 1.0 mmol *n*Bu<sub>4</sub>NPF<sub>6</sub> (387 mg), 0.1 mmol phenethylboronic acid (15 mg) and 0.4 mmol of 1,4-dioxane (34  $\mu$ L) were poured into the electrochemical cell. The scan rate is 150 mV/s, ranging from 0 V to 2.5 V.

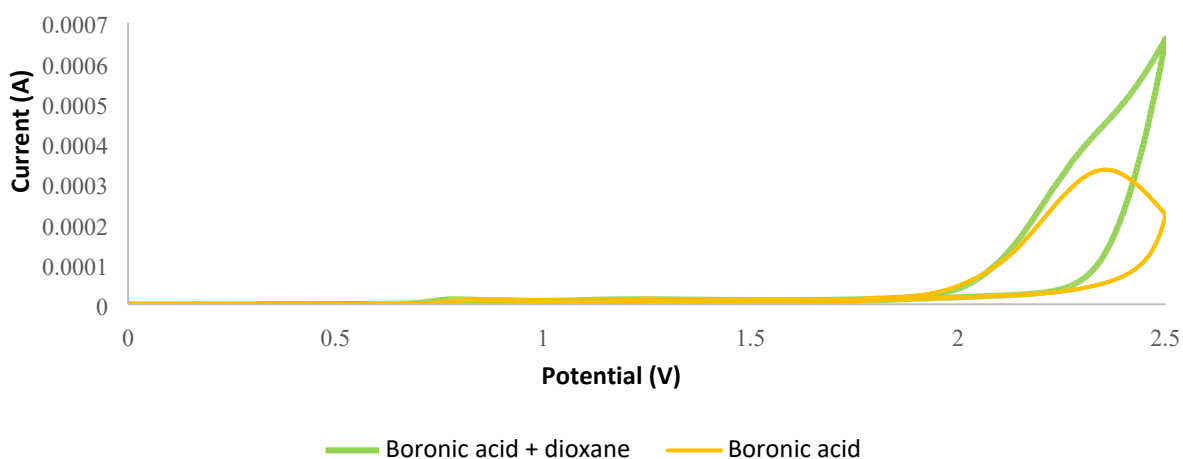

The same measurements performed using 1,4-dioxane as the major solvent (in a mixture with ACN in a ration of 7:3) did not lead to conclusive observations. The peak of the boronic acid could not be clearly detected, and the addition of Cs<sub>2</sub>CO<sub>3</sub> did not lead to an appreciable observation of new or shifted peaks.

As shown in the first two graphs reported above, when mixing phenethyl boronic acid respectively with TBABr and  $\text{Cs}_2\text{CO}_3$ , a new peak is forming around 2, suggesting the formation of a complex between the boronic acid and the additive employed. Nonetheless, its redox potential lies out the potential window of 4CzIPN, thus excluding the possibility of SET mechanism between the new boronic acid species and the photocatalyst.

As a consequence, the cyclic voltammetry data shown above suggest the positive interaction between TBABr and BA for radical generation.

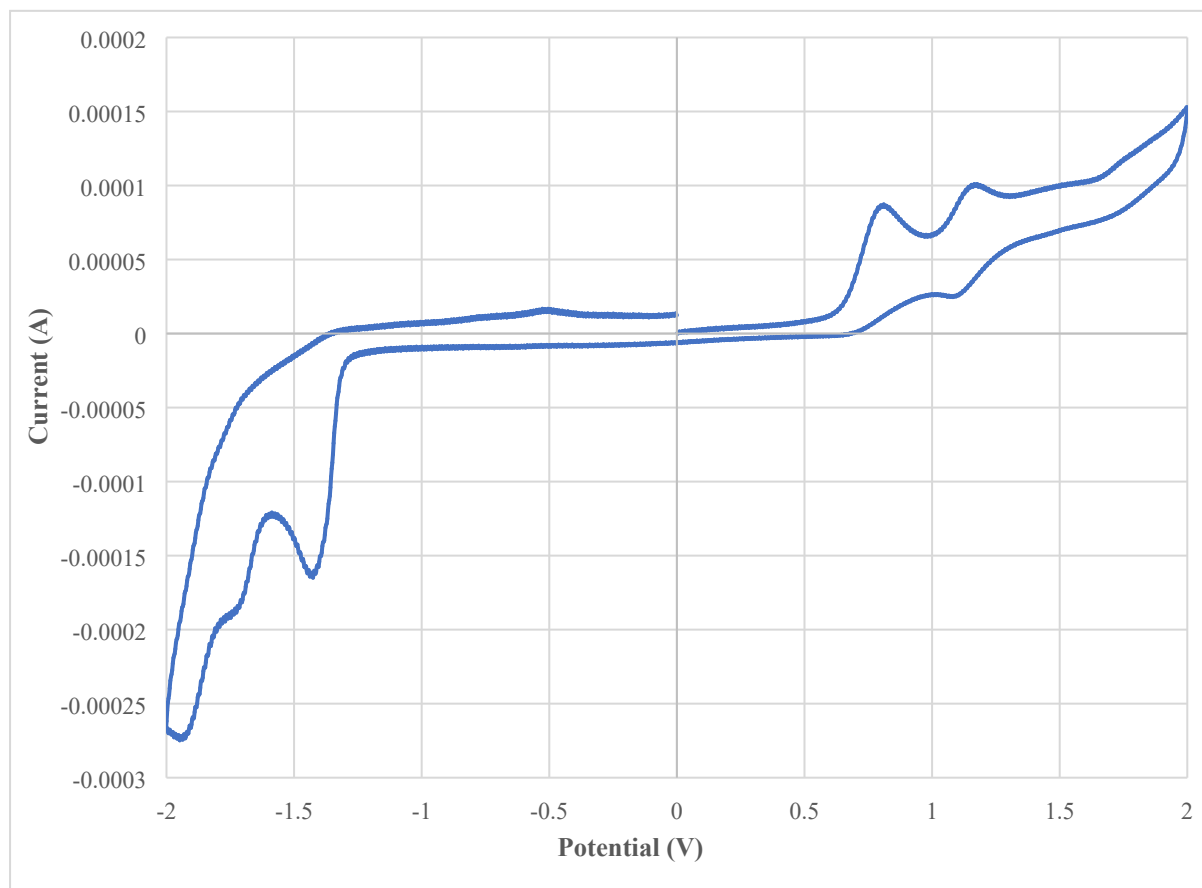

**Figure S11:** (dtbbpy)Ni(*o*-tolyl)Br cyclic voltammetry spectrum in  $\text{CH}_3\text{CN}$ .

Cyclic voltammogram of (dtbbpy)Ni(*o*-tolyl)Br shows an irreversible first oxidation at 0.65 V versus SCE in  $\text{CH}_3\text{CN}$  which corresponds to the  $\text{Ni}^{\text{II}}/\text{Ni}^{\text{III}}$  redox couple and an irreversible first reduction at -1.3 V versus SCE in  $\text{CH}_3\text{CN}$  which corresponds to the  $\text{Ni}^{\text{I}}/\text{Ni}^{\text{II}}$  redox couple. Remaining peaks could not be assigned due to the irreversible nature of the first oxidation and reduction.

#### 4.4 Miscellaneous

##### Bromine effect on the reaction kinetics

To an oven-dried 10 mL screw-capped vial equipped with a stirring bar were added cyclopentylboronic acid (34.2 mg, 0.3 mmol), methyl 4-bromobenzoate (43 mg, 0.2 mmol), 4CzIPN (7.9 mg, 0.01 mmol),  $\text{NiBr}_2\cdot\text{dtbbpy}$  (9.7 mg, 0.02 mmol)  $\text{Cs}_2\text{CO}_3$  (130.3 mg, 0.4 mmol) TBABr (16.1 mg, 0.05 mmol). The vial was capped, and three cycles vacuum/argon were performed before adding anhydrous degassed 1,4-dioxane (0.2 mL, 0.1 M). The reaction

mixture was stirred for 24 hours under 456 nm light irradiation using PhotoBOX reactor (Kessil light, LED power = 100%, fan speed = absent, stirring = 600 rpm). Different portions of the crude mixture at different times were collected. Product yields were measured by GC-MS analysis of the crude mixture in the presence of internal standard (3,4,5-trimethoxybenzene). The same experiment was also conducted without TBABr to observe bromine anion effect on reaction progress.

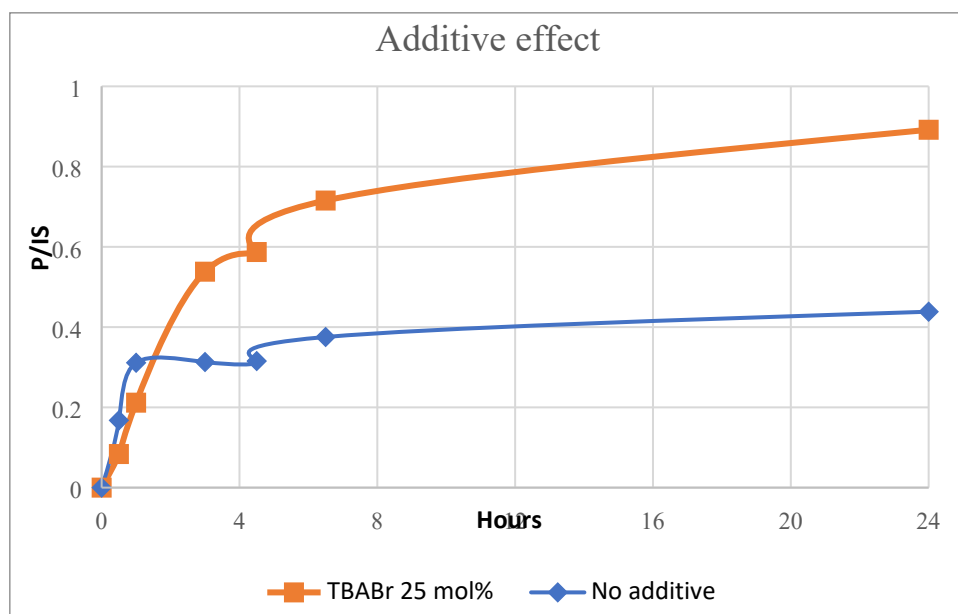

**Figure S12:** bromo anion effect on reaction's kinetics. P = product, IS = internal standard

These preliminary results show the benefits on the reaction kinetics by using TBABr as additive.

#### Giese-type addition

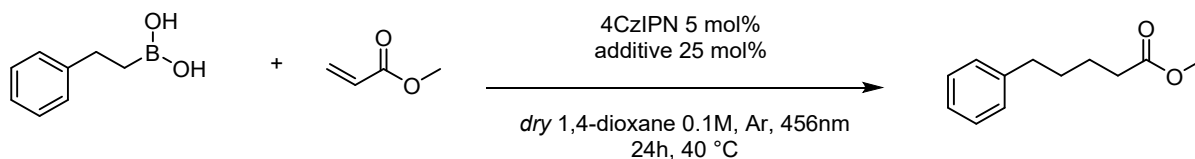

| Entry | Solvent     | Additive | Isolated yield% |
|-------|-------------|----------|-----------------|
| 1     | 1,4-dioxane | -        | 0               |
| 2     | 1,4-dioxane | TBABr    | 60              |

To further confirm the involvement of TBABr in radical formation from alkyl boronic acid, a Giese-type addition was performed. As shown in entry 2, no product is observed in the absence

of TBABr. This suggests a possible radical transfer mechanism from bromine radical and boronic acid with subsequent radical formation.

## 5. Photocatalyzed Suzuki-Miyaura reaction

Reaction in the presence of electron rich aryl iodides

When performing the reaction with electron rich aryl bromides, a moderate yield was observed. Due to the difficult oxidative addition in the presence of electron-rich aryl bromides, the reaction was attempted with electron-rich aryl iodides.

The reaction proved to be equally effective using aryl iodides, and especially in the case of electron rich species, good yields could be obtained.

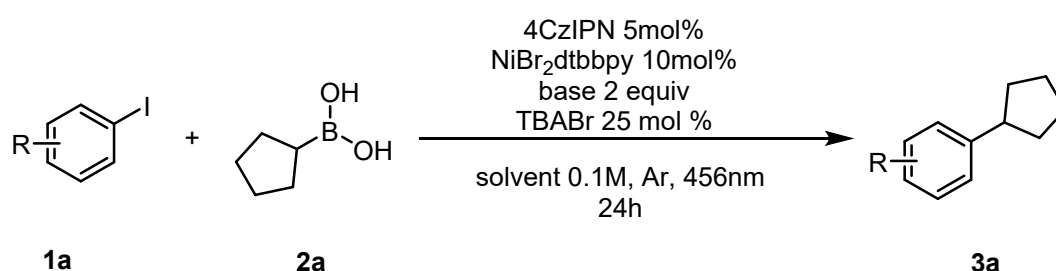

| Aryl iodide | Yield (%) |
|-------------|-----------|
|             | 70%       |
|             | 70%       |

### 1-cyclopentyl-4-methoxybenzene

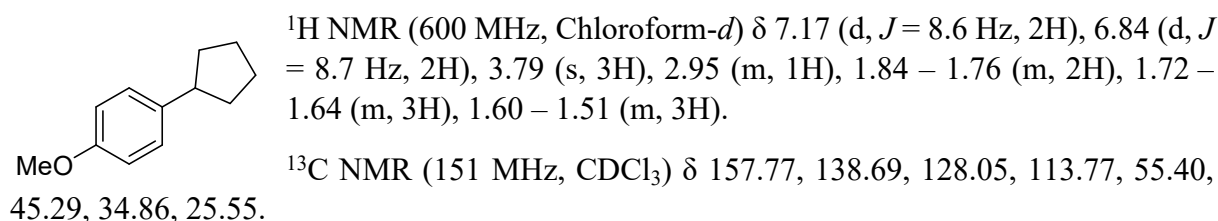

### 1-cyclopentyl-4-methylbenzene

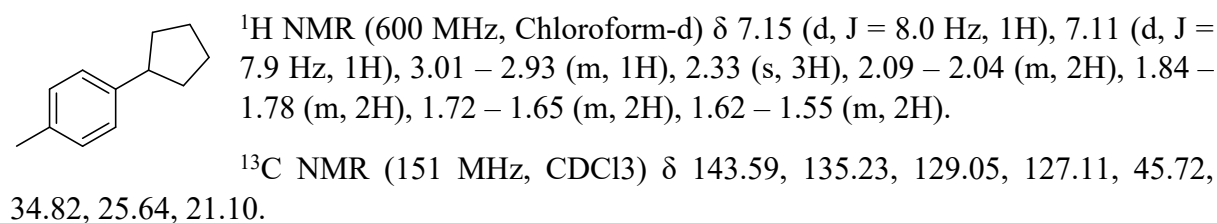



## General procedure using haloarenes and triflates as substrates

To a 10 mL reaction vial equipped with a stir bar were added bromobenzoate or triflate (0.2 mmol, 1 equiv), alkyl boronic boronic acid, (0.3 mmol, 1.5 equiv), 4CzIPN (8 mg, 0.01 mmol, 0.05 equiv),  $\text{NiBr}_2\cdot\text{dtbbpy}$  (9.7 mg, 0.02 mmol, 0.1 equiv),  $\text{Cs}_2\text{CO}_3$  (130 mg, 0.4 mmol, 2 equiv), and TBABr (16 mg, 0.05 mmol, 0.25 equiv). The vial was sealed with a cap containing a TFE-lined silicone septa and was evacuated and purged with argon three times via an inlet needle. The vial was then charged with an appropriate anhydrous solvent (0.1M, 2 mL). After this, the vial was irradiated in the PhotoRedox BOX reactor equipped with one Kessil light 456 nm. The temperature of the reaction was maintained at approximately 40 °C. After 24 h, the solvent was evaporated and purification via flash columns chromatography performed.

## Tested substrates excluded from the study using bromo arene as starting material in batch

| Failed substrates             |  |
|-------------------------------|--|
|                               |  |
| Poor performing substrates    |  |
|                               |  |
| Failing tested boronic esters |  |
|                               |  |

## General procedure using acylchlorides as substrates

To a 10 mL reaction vial equipped with a stir bar were added acyl chloride (if solid) (0.3 mmol, 1 equiv), alkyl boronic acid, (0.45 mmol, 1.5 equiv),  $[\text{Ir}(\text{dFCF}_3\text{ppy})_2(\text{bpy})]\text{PF}_6$  (6 mg, 0.006 mmol, 0.02 equiv),  $\text{NiCl}_2\cdot\text{glyme}$  (2.6 mg, 0.012 mmol, 0.04 equiv) dtbbpy (3.2 mg, 0.012 mmol, 0.04 equiv),  $\text{Cs}_2\text{CO}_3$  (195 mg, 0.6 mmol, 2 equiv), The vial was sealed with a cap containing a TFE-lined silicone septa and was evacuated and purged with argon three times via an inlet needle. The vial was then charged with anhydrous THF (0.1M, 3 mL and acyl chloride (if liquid). After this, the vial was irradiated in the PhotoRedox BOX reactor equipped with one Kessil light 456 nm. The temperature of the reaction was maintained at approximately 40 °C. After 24 h, the solvent was evaporated and purification via flash columns chromatography performed.

## 6. Spectral data for new compounds

### Methyl 4-cyclopentylbenzoate (3a)

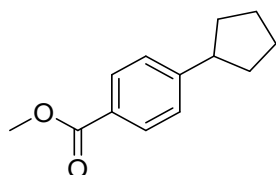

The product was isolated by flash chromatography (2% ethyl acetate/heptane) as a yellow oil (37 mg, 90%). The spectroscopic data of this compound are consistent with the data reported in the literature.<sup>1</sup>

**<sup>1</sup>H NMR (400 MHz, Chloroform-*d*)**  $\delta$  7.95 (d,  $J$  = 8.4 Hz, 2H), 7.30 (d,  $J$  = 8.2 Hz, 2H), 3.90 (s, 3H), 3.12 – 2.95 (m, 1H), 2.14 – 2.02 (m, 2H), 1.87 – 1.78 (m, 2H), 1.74 – 1.67 (m, 2H), 1.67 – 1.56 (m, 2H).

**<sup>13</sup>C NMR (101 MHz, Chloroform-*d*)**  $\delta$  167.32, 152.34, 129.73, 127.76, 52.06, 46.10, 34.62, 25.70.

### Tert-butyl 2-(4-methoxycarbonylphenyl)pyrrolidine-1-carboxylate (3b)

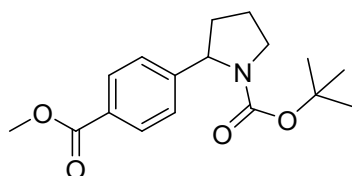

The product was isolated by flash chromatography (10% ethyl acetate/heptane) as a yellow oil (55 mg, 90%). The product was obtained as a mixture of two rotamers (R1:R2 = 2.3:1). The spectroscopic data of this compound are consistent with the data reported in the literature.<sup>2</sup>

**<sup>1</sup>H NMR (600 MHz, Chloroform-*d*)**  $\delta$  7.97 (d, *J* = 8.3 Hz, 2H, R1 + R2), 7.23 (d, *J* = 8.4 Hz, 2H, R1 + R2), 4.97 (brm, R2), 4.79 (brm, R1) (1H for R1 + R2), 3.90 (s, 3H, R1 + R2), 3.65 – 3.52 (m, 2H, R1 + R2), 2.40 – 2.27 (m, 1H, R1 + R2), 1.96 – 1.76 (m, 3H, R1 + R2), 1.44 (s, R2), 1.16 (s, R1) (9H for R1 and R2).

**<sup>13</sup>C NMR (151 MHz, Chloroform-*d*)**  $\delta$  167.16, 154.56, 150.75, 129.95, 129.75, 128.65, 125.61, 79.63, 61.35, 60.73, 52.16, 47.51, 47.28, 36.07, 28.26, 23.40, 22.82.

### Methyl 4-isopropylbenzoate (3c)

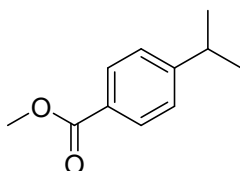

The product was isolated by flash chromatography (2% ethyl acetate/heptane) as a yellow oil (14 mg, 40%). The spectroscopic data of this compound are consistent with the data reported in the literature.<sup>3</sup>

**<sup>1</sup>H NMR (400 MHz, Chloroform-*d*)**  $\delta$  7.96 (d, *J* = 8.4 Hz, 2H), 7.29 (d, *J* = 8.2 Hz, 2H), 3.90 (s, 3H), 2.96 (p, *J* = 6.9 Hz, 1H), 1.27 (d, *J* = 7.0 Hz, 6H).

**<sup>13</sup>C NMR (101 MHz, Chloroform-*d*)**  $\delta$  167.32, 154.45, 129.87, 127.91, 126.61, 52.09, 34.39, 23.84.

### Methyl 4-cyclobutylbenzoate (3d)

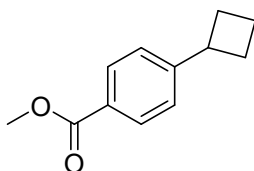

The product was isolated by flash chromatography (3% ethyl acetate/heptane) as a white solid (37 mg, 97%). The spectroscopic data of this compound are consistent with the data reported in the literature.<sup>1</sup>

**<sup>1</sup>H NMR (400 MHz, Chloroform-*d*)**  $\delta$  7.96 (d, *J* = 8.9 Hz, 2H), 6.81 (d, *J* = 8.9 Hz, 2H), 4.78 – 4.63 (m, 1H), 3.87 (s, 3H), 2.55 – 2.36 (m, 2H), 2.27 – 2.09 (m, 2H), 1.95 – 1.80 (m, 1H), 1.78 – 1.66 (m, 1H).

**<sup>13</sup>C NMR (101 MHz, Chloroform-*d*)**  $\delta$  167.02, 161.55, 131.71, 122.54, 114.67, 71.85, 51.95, 30.63, 13.43.

### 1,1-Dimethylethyl 4-[4-(methoxycarbonyl)phenyl]-1-piperidinecarboxylate (3e)

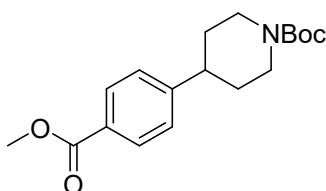

The product was isolated by flash chromatography (10% ethyl acetate/heptane) as a light-yellow solid (64 mg, 99%). The spectroscopic data of this compound are consistent with the data reported in the literature.<sup>4</sup>

**<sup>1</sup>H NMR (400 MHz, Chloroform-*d*)**  $\delta$  7.97 (d,  $J = 8.4$  Hz, 2H), 7.26 (d,  $J = 8.4$  Hz, 2H), 4.25 (brs, 2H), 3.89 (s, 3H), 2.80 (t,  $J = 12.8$  Hz, 2H), 2.70 (tt,  $J = 12.2, 3.6$  Hz, 1H), 1.86 – 1.78 (m, 2H), 1.62 (qd,  $J = 12.6, 4.3$  Hz, 2H), 1.47 (s, 9H).

**<sup>13</sup>C NMR (101 MHz, Chloroform-*d*)**  $\delta$  167.11, 154.91, 151.17, 130.00, 128.45, 126.95, 79.66, 52.13, 42.92, 33.00, 28.59.

#### Methyl 4-(2-phenylethyl)benzoate (3f):

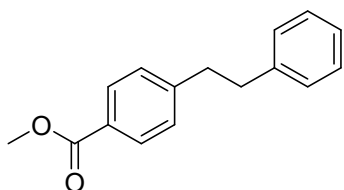

The reaction was performed on a 0.1 mmol scale and the product was isolated by flash chromatography (3% ethyl acetate/heptane) as a yellow oil (15 mg, 62%). The spectroscopic data of this compound are consistent with the data reported in the literature.<sup>5</sup>

**<sup>1</sup>H NMR (400 MHz, Chloroform-*d*)**  $\delta$  8.01 – 7.95 (m, 2H), 7.32 – 7.16 (m, 7H), 3.93 (s, 3H), 3.05 – 2.90 (m, 4H).

**<sup>13</sup>C NMR (101 MHz, Chloroform-*d*)**  $\delta$  167.28, 147.30, 141.26, 129.82, 129.68 – 128.53 (m), 128.07, 126.22, 52.12, 38.02, 37.59.

#### Methyl 4-(2-methylpropyl)benzoate (3g)

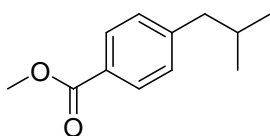

The product was isolated by flash chromatography (2% ethyl acetate/heptane) as a yellow liquid (16 mg, 42%). The spectroscopic data of this compound are consistent with the data reported in the literature.<sup>6</sup>

**<sup>1</sup>H NMR (400 MHz, Chloroform-*d*)**  $\delta$  7.95 (d,  $J = 8.3$  Hz, 2H), 7.21 (d,  $J = 8.4$  Hz, 2H), 3.90 (s, 3H), 2.52 (d,  $J = 7.2$  Hz, 2H), 1.89 (hept,  $J = 6.8$  Hz, 1H), 0.91 (s, 3H), 0.89 (s, 3H).

**<sup>13</sup>C NMR (101 MHz, Chloroform-*d*)**  $\delta$  167.37, 147.42, 129.60, 129.25, 127.83, 52.08, 45.54, 30.26, 22.45.

#### Methyl 4-ethylbenzoate (3h)

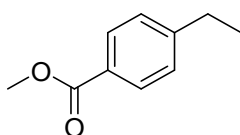

The product was isolated by flash chromatography (2% ethyl acetate/heptane) as a yellow liquid (15 mg, 45%). The spectroscopic data of this compound are consistent with the data reported in the literature.<sup>7</sup>

**<sup>1</sup>H NMR (400 MHz, Chloroform-*d*)**  $\delta$  7.96 (d,  $J$  = 8.3 Hz, 2H), 7.26 (d,  $J$  = 8.5 Hz, 1H), 3.90 (s, 3H), 2.70 (q,  $J$  = 7.6 Hz, 2H), 1.26 (t,  $J$  = 7.6 Hz, 3H).

**<sup>13</sup>C NMR (101 MHz, Chloroform-*d*)**  $\delta$  167.34, 149.88, 131.86, 131.26, 129.84, 128.02, 127.78, 52.09, 29.09, 15.35.

#### Methyl 4-butylbenzoate (3i)

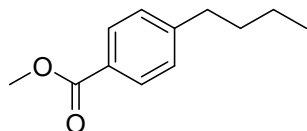

The product was isolated by flash chromatography (2% ethyl acetate/heptane) as a yellow liquid (16 mg, 41%). The spectroscopic data of this compound are consistent with the data reported in the literature.<sup>7</sup>

**<sup>1</sup>H NMR (400 MHz, Chloroform-*d*)**  $\delta$  7.95 (d,  $J$  = 8.3 Hz, 2H), 7.24 (d,  $J$  = 8.3 Hz, 2H), 3.90 (s, 3H), 2.88 – 2.52 (m, 2H), 1.77 – 1.48 (m, 2H), 1.35 (dq,  $J$  = 14.6, 7.3 Hz, 2H), 0.93 (t,  $J$  = 7.4 Hz, 3H).

**<sup>13</sup>C NMR (101 MHz, Chloroform-*d*)**  $\delta$  167.35, 148.62, 129.75, 128.57, 127.75, 52.08, 35.84, 33.40, 22.45, 14.03.

#### Methyl 4-(but-3-en-1-yl)benzoate (3j)

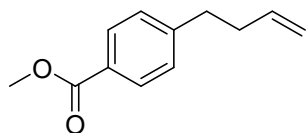

The product was isolated by flash chromatography (2% ethyl acetate/heptane) as a yellow oil (8 mg, 21%). The spectroscopic data of this compound are consistent with the data reported in the literature.<sup>8</sup>

**<sup>1</sup>H NMR (400 MHz, Chloroform-*d*)**  $\delta$  8.00 – 7.95 (m, 2H), 7.30 – 7.25 (m, 2H), 5.85 (ddt,  $J$  = 16.9, 10.2, 6.6 Hz, 1H), 5.10 – 4.98 (m, 2H), 3.93 (s, 3H), 2.79 (dd,  $J$  = 8.7, 6.8 Hz, 2H), 2.45 – 2.38 (m, 2H).

**<sup>13</sup>C NMR (101 MHz, Chloroform-*d*)**  $\delta$  167.31, 147.50, 137.63, 129.81, 128.64, 128.01, 115.51, 52.12, 35.51, 35.21, 29.85.

#### 1,1-Dimethylethyl 2-[4-(trifluoromethyl)phenyl]-1-pyrrolidinecarboxylate (4a)

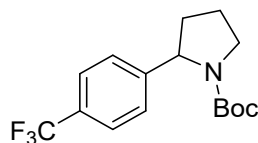

The product was isolated by flash chromatography (from 5% to 15% ethyl acetate/heptane) as a yellow oil (42 mg, 66%). The product was obtained as a mixture of two rotamers (R1:R2 =

2:1). The spectroscopic data of this compound are consistent with the data reported in the literature.<sup>9</sup>

**<sup>1</sup>H NMR (400 MHz, Chloroform-*d*)**  $\delta$  7.55 (d,  $J$  = 8.2 Hz, **2H**, R1+R2), 7.28 (d,  $J$  = 8.0 Hz, **2H**, R1+R2), 4.98 (brm, R2), 4.81 (brm, R1) (**1H** for R1+R2), 3.68-3.52 (m, **2H**, R1+R2), 2.41-2.27 (m, **1H**, R1+R2), 1.94-1.70 (m, **3H**, R1+R2), 1.45 (s, R2) and 1.18 (s, R1) (**9H**, R1+R2).

**<sup>13</sup>C NMR (101 MHz, Chloroform-*d*)**  $\delta$  156.63, 149.15, 128.91 (d,  $J$  = 32.3 Hz), 125.48 (d,  $J$  = 60.1 Hz), 120.86, 118.45, 79.70, 61.17 and 60.64 (R1 + R2) 47.53 and 47.28 (R1 + R2), 36.07 and 35.12 (R1 + R2), 28.59 and 28.25 (R1 + R2), 23.67 and 23.33 (R1 + R2).

#### ***tert*-butyl 2-(4-acetylphenyl)pyrrolidine-1-carboxylate (4b)**

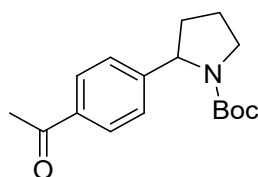

The product was isolated by flash chromatography (from 5% to 15% ethyl acetate/heptane) as a yellow oil (57 mg, 99%). The product was obtained as a mixture of two rotamers (R1:R2 = 2:1). The spectroscopic data of this compound are consistent with the data reported in the literature.<sup>10</sup>

**<sup>1</sup>H NMR (600 MHz, Chloroform-*d*)**  $\delta$  7.89 (d,  $J$  = 8.3 Hz, **2H**, R1 + R2), 7.25 (d,  $J$  = 8.3 Hz, **2H**, R1 + R2), 4.95 (brm, R2), 4.80 (brm, R1) (**1H** for R1 + R2), 3.68- 3.48 (m, **2H**, R1 + R2), 2.58 (s, **3H**, R1 + R2), 2.37 - 2.28 (m, **1H**, R1 + R2), 1.91 - 1.76 (m, **3H**, R1 + R2), 1.44 (s, R2), 1.16 (s, R1) (**9H** for R1 + R2).

**<sup>13</sup>C NMR (151 MHz, Chloroform-*d*)**  $\delta$  197.86, 154.52, 150.91, 135.83, 128.54, 125.74, 79.61, 61.27 and 60.78 (R1 +R2), 47.52 and 47.24 (R1 +R2), 36.00, 28.57 and 28.25 (R1 +R2), 26.69, 23.35 and 22.79 (R1 +R2).

#### ***tert*-butyl 2-(4-fluorophenyl)pyrrolidine-1-carboxylate (4c)**

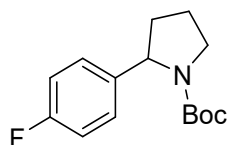

The product was isolated by flash chromatography (from 5% to 10% ethyl acetate/heptane) as a yellow oil (53 mg, 99%). The product was obtained as a mixture of two rotamers (R1:R2 = 2:1). The spectroscopic data of this compound are consistent with the data reported in the literature.<sup>11</sup>

**<sup>1</sup>H NMR (400 MHz, Chloroform-*d*)**  $\delta$  7.16 – 7.09 (m, **2H**, R1 + R2), 7.02 – 6.91 (m, **2H**, R1 + R2), 4.92 (brm, R2), 4.74 (brm, R1) (**1H** for R1 + R2), 3.64 – 3.62 (m, **2H**, R1 + R2), 2.36 – 2.26 (m, **1H**, R1 + R2), 1.94 – 1.74 (m, **3H**, R1 + R2), 1.46 (s, R2), 1.22 – 1.18 (m, R1) (**9H** for R1 and R2).

**<sup>13</sup>C NMR (101 MHz, Chloroform-*d*)**  $\delta$  162.95, 160.53, 154.66, 127.05, 115.15 and 114.94 (R1 + R2), 79.47, 60.86, 47.22, 36.23 and 35.57 (R1 + R2), 32.07, 29.84, 22.83.

$^{19}\text{F}$  NMR (400 MHz, Chloroform-*d*) – 116.87.

***tert*-butyl 2-(4-2,2,2-trifluoroacetophenone)pyrrolidine-1-carboxylate (4d)**

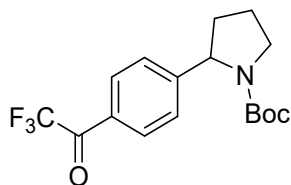

The product was isolated by flash chromatography (from 5% to 10% ethyl acetate/heptane) as a yellow oil (21 mg, 31%). The product was obtained as a mixture of two rotamers (R1:R2 = 1.5:1).

$^1\text{H}$  NMR (400 MHz, Chloroform-*d*)  $\delta$  8.01 (d,  $J$  = 8.0 Hz, 2H, R1 + R2), 7.35 (d,  $J$  = 8.4 Hz, 2H, R1 + R2), 4.99 – 4.97 (brm, R2), 4.84 – 4.81 (brm, R1) (1H for R1 + R2), 3.66 – 3.63 (m, 2H, R1 + R2), 2.41 - 2.34 (m, 1H, R1 + R2), 1.93 – 1.78 (m, 3H, R1 + R2), 1.45 (s, R2), 1.17 (s, R1) (9H for R1 and R2).

$^{13}\text{C}$  NMR (101 MHz, Chloroform-*d*)  $\delta$  180.05 (q,  $J$  = 34.8 Hz), 154.31, 153.80, 152.84, 132.61, 130.54, 130.31, 128.44, 126.18, 121.07, 118.17, 115.27, 112.38, 79.81, 61.23 and 60.75 (R1 + R2), 47.21, 35.85 and 34.72 (R1 + R2), 28.55 and 28.44 (R1 + R2), 23.68 and 23.32 (R1 + R2).

$^{19}\text{F}$  NMR (400 MHz, Chloroform-*d*) – 71.35.

**1,1-Dimethylethyl 2-(4-cyanomethyl)-1-pyrrolidinecarboxylate (4e)**

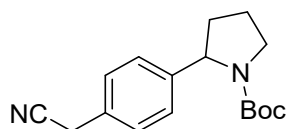

The product was isolated by preparative TLC (20% ethyl acetate/heptane) as a yellow oil (50mg, 87%). The product was obtained as a mixture of two rotamers (R1:R2 = 1.5:1).

$^1\text{H}$  NMR (600 MHz, Chloroform-*d*)  $\delta$  7.27 – 7.25 (m, 2H, R1 + R2), 7.18 (d,  $J$  = 7.9 Hz, 2H, R1 + R2), 4.93 (brm, R2), 4.77 (brm, R1) (1H for R1 + R2), 3.72 (d,  $J$  = 12.6 Hz, 2H), 3.65 – 3.46 (m, 2H, R1 + R2), 2.40 – 2.24 (m, 1H, R1 + R2), 1.91 – 1.83 (m, 2H, R1 + R2), 1.80 – 1.74 (m, 1H, R1 + R2), 1.45 (s, R2), 1.19 (s, R1) (9H for R1 and R2).

$^{13}\text{C}$  NMR (151 MHz, Chloroform-*d*)  $\delta$  154.64, 145.42, 128.14, 127.90, 126.43, 118.11, 79.52, 60.80 (d,  $J$  = 77.2 Hz), 47.21, 36.12, 28.32, 23.41.

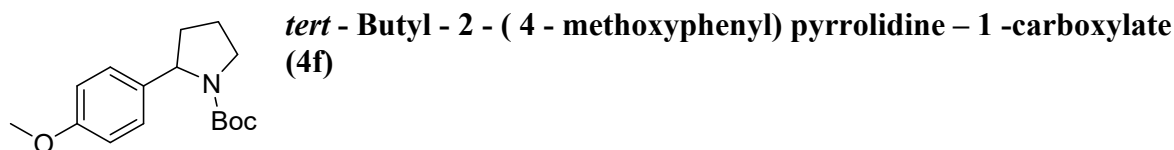

The product was isolated by flash chromatography eluting with 5% EtOAc/hexanes to afford the title compound as a colorless oil (20 mg, 36% yield). The product was obtained as a mixture of two rotamers (R1:R2 = 2:1).

**<sup>1</sup>H NMR (400 MHz, CDCl<sub>3</sub>):** δ 7.08 (d, *J* = 8.3 Hz, 2H, R1 + R2), 6.83 (d, *J* = 8.3 Hz, 2H, R1 + R2), 4.90 (br. m, R2), 4.71 (br. m, R1) (1H for R1 + R2), 3.79 (s, 3H for R1 + R2), 3.66–3.42 (m, 2H, R1 + R2), 2.34–2.17 (m, 1H, R1 + R2), 1.95–1.74 (m, 1H, R1 + R2), 1.45 (br. s, R2), 1.20 (br. s, R1) (9H for R1 and R2).

**<sup>13</sup>C NMR (101 MHz, CDCl<sub>3</sub>):** δ 158.34 (R1 + R2), 154.78 (R1 + R2), 137.43 (R2), 136.40 (R1), 126.72 (R1 + R2), 113.88 (R1), 113.56 (R2), 79.25 (R1 + R2), 60.86 (R2), 60.25 (R1), 55.40 (R1 + R2), 47.39 (R1), 47.12 (R2), 36.19 (R2), 35.01 (B), 28.65 (B), 28.35 (A), 23.59 (B), 23.27 (A).

The spectroscopic properties of this compound are consistent with data reported in the literature.

#### *tert*-butyl 2-([1,1'-biphenyl]-4-yl)pyrrolidine-1-carboxylate (4g)

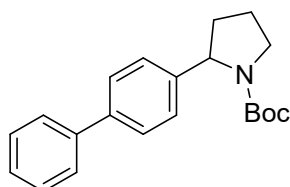

The product was isolated by flash chromatography (from 10% to 15% ethyl acetate/heptane) as a white solid (65 mg, quantitative yield). The product was obtained as a mixture of two rotamers (R1:R2 = 2:1). The spectroscopic data of this compound are consistent with the data reported in the literature.<sup>12</sup>

**<sup>1</sup>H NMR (400 MHz, Chloroform-*d*):** δ 7.67 – 7.49 (m, 4H, R1 + R2), 7.47 – 7.39 (m, 2H, R1 + R2), 7.37 – 7.28 (m, 1H, R1 + R2), 7.28 – 7.20 (m, 2H, R1 + R2), 5.07 – 4.96 (brm, R2), 4.89 – 4.76 (brm, R1) (1H for R1 + R2), 3.73 – 3.48 (m, 2H, R1 + R2), 2.43 – 2.23 (m, 1H, R1 + R2), 2.02 – 1.78 (m, 3H, R1 + R2), 1.47 (s, R2), 1.21 (s, R1) (9H for R1 and R2).

**<sup>13</sup>C NMR (151 MHz, Chloroform-*d*):** δ 154.74, 144.38, 141.03, 139.50, 128.85, 127.32, 127.24 (d, *J* = 3.9 Hz), 127.10, 126.92, 126.13, 125.91, 79.40, 72.58, 67.23, 66.53, 61.21, 60.59, 47.21, 36.13, 34.98, 28.50 (d, *J* = 57.6 Hz), 23.37.

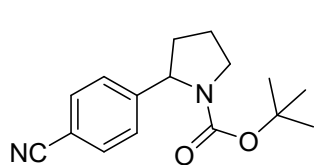

#### *tert*-Butyl 2-(4-cyanophenyl)pyrrolidine-1-carboxylate (4h)

The product was isolated by flash chromatography eluting with 7% EtOAc/hexanes to afford the title compound as a foam (27 mg, 50% yield). The product was obtained as a mixture of two rotamers (R1:R2 = 1.5:1).

**<sup>1</sup>H NMR (400 MHz, CDCl<sub>3</sub>):** δ 7.60 (d, *J* = 8.0 Hz, 2H, R1 + R2), 7.28 (d, *J* = 8.0 Hz, 2H, R1 + R2), 4.94 (brm, R2), 4.78 (brm, R1) (1H for R1 + R2), 3.64–3.60 (m, 2H, R1 + R2),



2.38-2.36 (m, **1H**, R1 + R2), 1.89-1.87 (m, **2H**, R1 + R2), 1.77- 1.75 (m, **1H**, R1 + R2), 1.45 (s, R2), 1.17 (s, R1) (**9H** for R1 and R2).

<sup>13</sup>C NMR (101 MHz, CDCl<sub>3</sub>) δ 154.6, 154.3, 150.9, 149.9, 132.4, 132.3, 126.4, 119.1, 110.5, 79.8, 61.3, 60.8, 47.6, 47.3, 36.0, 34.9, 4

The spectroscopic properties of this compound are consistent with data reported in the literature.

#### *tert*-butyl 2-(5-(trifluoromethyl)pyridin-2-yl)pyrrolidine-1-carboxylate (**4i**)

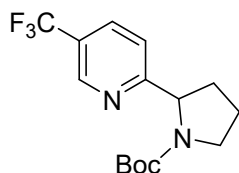

The product was isolated by preparative TLC (30% ethyl acetate/heptane) as a yellow oil (54 mg, 85%). The product was obtained as a mixture of two rotamers (R1:R2 = 1.5:1). The spectroscopic data of this compound are consistent with the data reported in the literature.<sup>13</sup>

<sup>1</sup>H NMR (600 MHz, Chloroform-*d*) δ 8.80 (s, **1H**, R1 + R2), 7.86 (t, *J* = 9.7 Hz, **1H**, R1 + R2), 7.31 (t, *J* = 8.3 Hz, **1H**, R1 + R2), 5.07 – 5.00 (brm, R2), 4.93 – 4.91 (brm, R1) (**1H** for R1 + R2), 3.69 – 3.49 (m, **2H**, R1 + R2), 2.46 – 2.29 (m, **1H**, R1 + R2), 2.08 – 1.94 (m, **1H**, R1 + R2), 1.91 (q, *J* = 6.8 Hz, **2H**, R1 + R2), 1.45 (s, R2), 1.20 (s, R1) (**9H** for R1 + R2).

<sup>13</sup>C NMR (151 MHz, Chloroform-*d*) δ 168.06, 166.92, 154.84, 154.45, 146.45, 146.22, 133.76, 133.51, 124.98, 124.76, 120.09, 119.61, 79.85, 62.88 and 62.31 (R1+R2), 47.63 and 47.28 (R1+R2), 34.39 and 33.13 (R1+R2), 28.61 and 28.31 (R1+R2), 24.05 and 23.41 (R1+R2).

<sup>19</sup>F NMR (400 MHz, Chloroform-*d*) – 62.19.

#### *tert*-butyl 2-(pyridine-3-yl)pyrrolidine-1-carboxylate (**4j**)

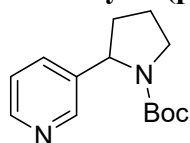

The product was isolated by flash chromatography (from 10% to 20% ethyl acetate/heptane) as a pale-yellow liquid (32 mg, 64%). The product was obtained as a mixture of two rotamers (R1:R2 = 2:1). The spectroscopic data of this compound are consistent with the data reported in the literature.

<sup>1</sup>H NMR (400 MHz, Chloroform-*d*): δ 8.47 (s, **1H**, R1 + R2), 8.52 – 8.42 (m, **1H**, R1 + R2), 7.52 – 7.46 (m, **1H**, R1 + R2), 7.23 (dd, *J* = 7.9, 4.8 Hz, **1H**, R1 + R2), 5.13 – 4.92 (m, R2), 4.85 – 4.70 (m, R1) (**1H** for R1 + R2), 3.71 – 3.37 (m, **2H**, R1 + R2), 2.57 – 2.24 (m, **1H**, R1 + R2), 2.05 – 1.68 (m, **3H**, R1 + R2), 1.45 (s, R2), 1.20 (s, R2) (**9H** for R1 + R2).

$^{13}\text{C}$  NMR (101 MHz, Chloroform-*d*):  $\delta$  154.2, 147.9, 147.7, 147.3, 140.3, 139.2, 133.0, 132.9, 123.1, 79.5, 59.1, 58.7, 47.1, 47.0, 35.8, 34.5, 28.3, 28.31, 23.4, 23.2.

***tert*-butyl 2-(6-methylpyridin-2-yl)pyrrolidine-1-carboxylate (4k)**

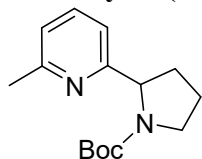

The product was isolated by flash chromatography (from 10% to 20% ethyl acetate/heptane) as a yellow solid (24 mg, 45%). The product was obtained as a mixture of two rotamers (R1:R2 = 2:1). The spectroscopic data of this compound are consistent with the data reported in the literature.<sup>14</sup>

$^1\text{H}$  NMR (400 MHz, Chloroform-*d*)  $\delta$  7.49 (t,  $J = 7.7$  Hz, 1H, R1 + R2), 6.95 (dd,  $J = 17.4$ , 7.7 Hz, 2H, R1 + R2), 5.03 – 4.92 (brm, R2), 4.89 – 4.76 (brm, R1) (1H for R1 + R2), 3.69 – 3.53 (m, 2H, R1 + R2), 2.51 (s, 3H, R1 + R2), 2.40 – 2.27 (m, 1H, R1 + R2), 1.94 – 1.78 (m, 3H, R1 + R2), 1.45 (s, R2), 1.19 (s, R1) (9H for R1 + R2).

$^{13}\text{C}$  NMR (101 MHz, Chloroform-*d*)  $\delta$  163.36, 157.60, 154.74, 136.57, 121.11, 116.39, 79.36, 63.09 and 62.45 (R1+R2), 47.47 and 47.14 (R1+R2), 34.43, 28.65 and 28.30 (R1+R2), 24.54, 23.22.

***tert*-Butyl-2-(pyrimidin-5-yl)pyrrolidine-1-carboxylate (4l)**

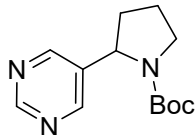

The product was isolated by flash chromatography (from 10% to 15% ethyl acetate/heptane) as a yellow solid (36 mg, 72%). The product was obtained as a mixture of two rotamers (R1:R2 = 1.4:1). The spectroscopic data of this compound are consistent with the data reported in the literature.<sup>15</sup>

$^1\text{H}$  NMR (400 MHz, Chloroform-*d*)  $\delta$  9.08 (s, 1H, R1 + R2), 8.56 (s, 2H, R1 + R2), 4.91 (brs, R2), 4.82 – 4.68 (brm, R1), (1H for R1 + R2), 3.70 – 3.37 (m, 2H, R1 + R2), 2.45 – 2.25 (m, 1H, R1 + R2), 1.99 – 1.77 (m, 3H), 1.42 (s, R2), 1.20 (s, R1) (9H for R1 + R2).

$^{13}\text{C}$  NMR (101 MHz, Chloroform-*d*)  $\delta$  157.48, 154.76, 137.91, 136.94, 80.24, 57.40, 56.95, 47.21, 35.70, 34.33, 29.77, 29.43, 28.38, 23.83, 23.51.

***tert*-butyl 2-(6-methylpyridinecarboxylate-2-yl)pyrrolidine-1-carboxylate (4m)**

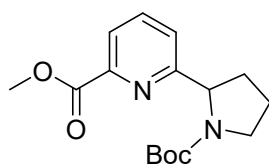

The product was isolated by flash chromatography (from 10% to 30% ethyl acetate/heptane) as a yellow solid (22 mg, 36%). The product was obtained as a mixture of two rotamers (R1:R2 = 1.5:1).

**<sup>1</sup>H NMR (600 MHz, Chloroform-*d*)**  $\delta$  7.97 – 7.89 (m, **1H**, R1 + R2), 7.79 – 7.67 (m, **1H**, R1 + R2), 7.32 (d,  $J = 7.9$  Hz, **1H**, R1 + R2), 5.09 – 5.02 (brm, R2), 4.98 – 4.95 (brm, R1), (**1H** for R1 + R2), 3.98 – 3.85 (m, **3H**, R1 + R2), 3.63 – 3.43 (m, **2H**, R1 + R2), 2.42 – 2.25 (m, **1H**, R1 + R2), 1.98 – 1.91 (m, **1H**, R1 + R2), 1.88 – 1.75 (m, **2H**, R1 + R2), 1.40 (s, R2), 1.13 (s, R1) (**9H** for R1 + R2).

**<sup>13</sup>C NMR (151 MHz, Chloroform-*d*)**  $\delta$  165.88, 164.59, 163.34, 154.57 (d,  $J = 21.9$  Hz), 147.48 (d,  $J = 39.8$  Hz), 137.22, 123.16 (d,  $J = 11.9$  Hz), 122.70, 79.56, 62.89, 62.21, 52.83 (d,  $J = 19.6$  Hz), 47.27 (d,  $J = 44.5$  Hz), 34.54, 33.18, 28.34 (d,  $J = 47.1$  Hz), 23.73, 23.19.

**HRMS (ESI<sup>+</sup>):** [M+H]<sup>+</sup> calculated for C<sub>16</sub>H<sub>23</sub>N<sub>2</sub>O<sub>4</sub> 307,1652 found: 307,1640.

***tert*-butyl 2-(dibenzo[*b,d*]furan-2-yl)pyrrolidine-1-carboxylate (4n)**

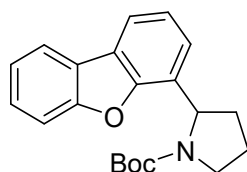

The product was isolated by flash chromatography (from 5% to 15% ethyl acetate/heptane) as a pale-yellow solid (56 mg, 83%). The product was obtained as a mixture of two rotamers (R1:R2 = 2.3:1).

**<sup>1</sup>H NMR (600 MHz, Chloroform-*d*)**  $\delta$  7.95 (d,  $J = 7.7$  Hz, **1H**, R1 + R2), 7.83 (d,  $J = 7.6$  Hz, **1H**, R1 + R2), 7.61 – 7.56 (m, **1H**, R1 + R2), 7.48 – 7.43 (m, **1H**, R1 + R2), 7.37 – 7.31 (m, **1H**, R1 + R2), 7.29 (t,  $J = 7.5$  Hz, **1H**, R1 + R2), 7.25 – 7.19 (m, **1H**, R1 + R2), 5.56 – 5.51 (brm, R2), 5.40 – 5.36 (brm, R1) (**1H** for R1 + R2), 3.81 – 3.57 (m, **2H**, R1 + R2), 2.46 (dq,  $J = 22.9, 15.4, 11.4$  Hz, **1H**, R1 + R2), 2.12 – 1.89 (m, **2H**, R1 + R2), 1.83 (dd,  $J = 6.7, 3.5$  Hz, **1H**, R1 + R2), 1.47 (s, R2), 1.08 (s, R1) (**9H** for R1 + R2).

**<sup>13</sup>C NMR (151 MHz, Chloroform-*d*)**  $\delta$  156.21, 154.68, 153.17, 129.07, 124.38, 124.15, 123.73, 122.79, 122.66, 120.77, 119.05, 118.91, 111.82, 79.31, 79.01, 56.61, 47.07, 34.58, 28.69, 28.19, 23.98, 23.72.

**HRMS (ESI<sup>+</sup>):** [M+Na]<sup>+</sup> calculated for C<sub>21</sub>H<sub>23</sub>NaNO<sub>3</sub> 360,1570 found: 360,1560.

***tert*-Butyl 2-(2-quinolinyl)pyrrolidine-1-carboxylate (4o)**

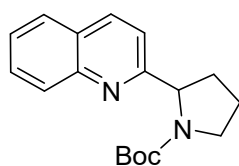

The product was isolated by flash chromatography (from 10% to 30% ethyl acetate/heptane) as a yellow solid (76 mg, 85%). The product was obtained as a mixture of two rotamers (R1:R2 = 2.3:1). The spectroscopic data of this compound are consistent with the data reported in the literature.<sup>16</sup>

**<sup>1</sup>H NMR (400 MHz, Chloroform-*d*)**  $\delta$  8.14 – 8.08 (m, **1H**, R1 + R2), 8.03 (d,  $J$  = 8.5 Hz, **1H**, R1 + R2), 7.83 – 7.74 (m, **1H**, R1 + R2), 7.72 – 7.66 (m, **1H**, R1 + R2), 7.54 – 7.46 (m, **1H**, R1 + R2), 7.32 (d,  $J$  = 8.5 Hz, **1H**, R1 + R2), 5.16 (brs, R2), 5.07 – 4.98 (brmm, R1) (**1H** for R1 + R2), 3.70 (q,  $J$  = 10.7, 8.8 Hz, **2H**, R1 + R2), 2.55 – 2.35 (m, **1H**, R1 + R2), 2.07 – 1.83 (m, **3H**, R1 + R2), 1.46 (s, R2), 1.11 (s, R1), (**9H** for R1 + R2).

**<sup>13</sup>C NMR (151 MHz, Chloroform-*d*)**  $\delta$  164.45, 154.78, 147.62, 136.63, 129.64, 129.05, 127.65, 127.19, 126.09, 117.85, 79.57, 63.78, 63.09, 47.69, 34.80, 29.83, 28.65, 23.71.

**HRMS (ESI<sup>+</sup>):** [M+H]<sup>+</sup> calculated for C<sub>18</sub>H<sub>23</sub>N<sub>2</sub>O<sub>2</sub> 299,1754 found: 299,1759.

#### ***tert*-butyl 2-(*p*-tolyl)pyrrolidine-1-carboxylate (4p)**

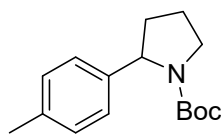

The product was isolated by flash chromatography (from 10% to 20% ethyl acetate/heptane) as a pale-yellow liquid (8 mg, 17%). The product was obtained as a mixture of two rotamers (R1:R2 = 2:1). The spectroscopic data of this compound are consistent with the data reported in the literature.<sup>14</sup>

**<sup>1</sup>H NMR (500 MHz, Chloroform-*d*)**  $\delta$  7.10 (d,  $J$  = 7.6 Hz, **2H**, R1 + R2), 7.04 (d,  $J$  = 8.1 Hz, **2H**, R1 + R2), 5.00 – 4.67 (m, **1H**, R1 + R2), 3.69 – 3.42 (m, **2H**, R1 + R2), 2.32 (m, **4H**), 1.96 – 1.74 (m, **3H**), 1.45 (s, R2), 1.19 (s, R1) (**9H** for R1 + R2).

**<sup>13</sup>C NMR (125 MHz, Chloroform-*d*)**  $\delta$  154.7, 142.0, 135.9, 129.0, 128.7, 125.4, 79.2, 61.0, 60.6, 47.0, 36.0, 34.8, 28.5, 28.2, 23.1, 21.0.

#### **(4-(*tert*-Butyl)phenyl)(cyclopentyl)methanone (4q)**

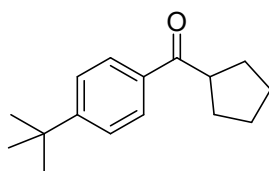

The product was isolated by flash chromatography (5% ethyl acetate/heptane) as a colourless oil (30 mg, 0.13 mmol, 43% yield). The spectroscopic data of this compound are consistent with the data reported in the literature.<sup>17</sup>

**<sup>1</sup>H NMR (500 MHz, Chloroform-*d*)**  $\delta$  7.95 (d,  $J$  = 8.5 Hz, **2H**), 7.50 (d,  $J$  = 8.5 Hz, **2H**), 3.76-3.70 (m, **1H**), 1.96-1.92 (m, **4H**), 1.79-1.64 (m, **4H**), 1.37 (s, **9H**).

$^{13}\text{C}$  NMR (125 MHz, Chloroform-*d*)  $\delta$  202.5, 156.4, 134.3, 128.4, 125.5, 46.3, 35.1, 31.1, 30.0, 26.3.

#### Methyl 4-(cyclopentanecarbonyl)benzoate (4r)

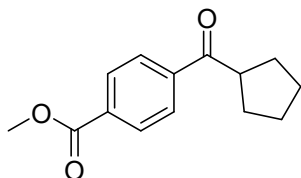

The product was isolated by flash chromatography (5% ethyl acetate/heptane) as a white solid (27 mg, 0.12 mmol, 39% yield). The spectroscopic data of this compound are consistent with the data reported in the literature.<sup>18</sup>

$^1\text{H}$  NMR (400 MHz, Chloroform-*d*)  $\delta$  8.13 – 8.11 (m, 2H), 8.03 – 8.00 (m, 2H), 3.95 (s, 3H), 3.72 (ddd,  $J = 15.7, 8.5, 7.2$  Hz, 1H), 1.98 – 1.88 (m, 4H), 1.76 – 1.64 (m, 4H).

$^{13}\text{C}$  NMR (101 MHz, Chloroform-*d*)  $\delta$  202.4, 166.5, 140.4, 133.7, 129.9, 128.5, 52.5, 46.9, 30.0, 26.4.

#### (4-Chlorophenyl)(cyclopentyl)methanone (4s)

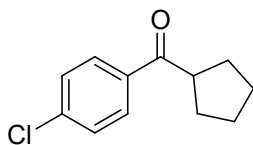

The product was isolated by flash chromatography (3% ethyl acetate/heptane) as a colourless oil (11 mg, 0.05 mmol, 18% yield). The spectroscopic data of this compound are consistent with the data reported in the literature.<sup>19</sup>

$^1\text{H}$  NMR (600 MHz, Chloroform-*d*)  $\delta$  7.91 (d,  $J = 8.7$  Hz, 2H), 7.42 (d,  $J = 8.8$  Hz, 2H), 3.66 (quintet,  $J = 8.1$  Hz, 1H), 1.72 (m, 2H), 1.91 (m, 4H), 1.66 (m, 2H).

$^{13}\text{C}$  NMR (150 MHz, Chloroform-*d*)  $\delta$  201.5, 139.1, 135.2, 129.9, 128.8, 46.3, 29.9, 26.3.

#### cyclopentyl(*p*-tolyl)methanone (4t)

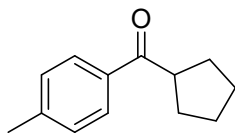

The product was isolated by flash chromatography (3% ethyl acetate/heptane) as a colourless oil (34 mg, 0.18 mmol, 60% yield). The spectroscopic data of this compound are consistent with the data reported in the literature.<sup>20</sup>

$^1\text{H}$  NMR (600 MHz, CDCl<sub>3</sub>)  $\delta$  7.88 (d,  $J = 7.8$  Hz, 2H), 7.25 (d,  $J = 7.8$  Hz, 2H), 3.72–3.67 (m, 1H), 2.41 (s, 3H), 1.95 – 1.86 (m, 4H), 1.76 – 1.69 (m, 2H), 1.67 – 1.61 (m, 2H).

**$^{13}\text{C}$  NMR (151 MHz,  $\text{CDCl}_3$ )  $\delta$  202.5, 143.4, 134.4, 129.2, 128.6, 46.2, 30.0, 26.3, 21.6.**

### <sup>1</sup>H NMR spectrum of 3a

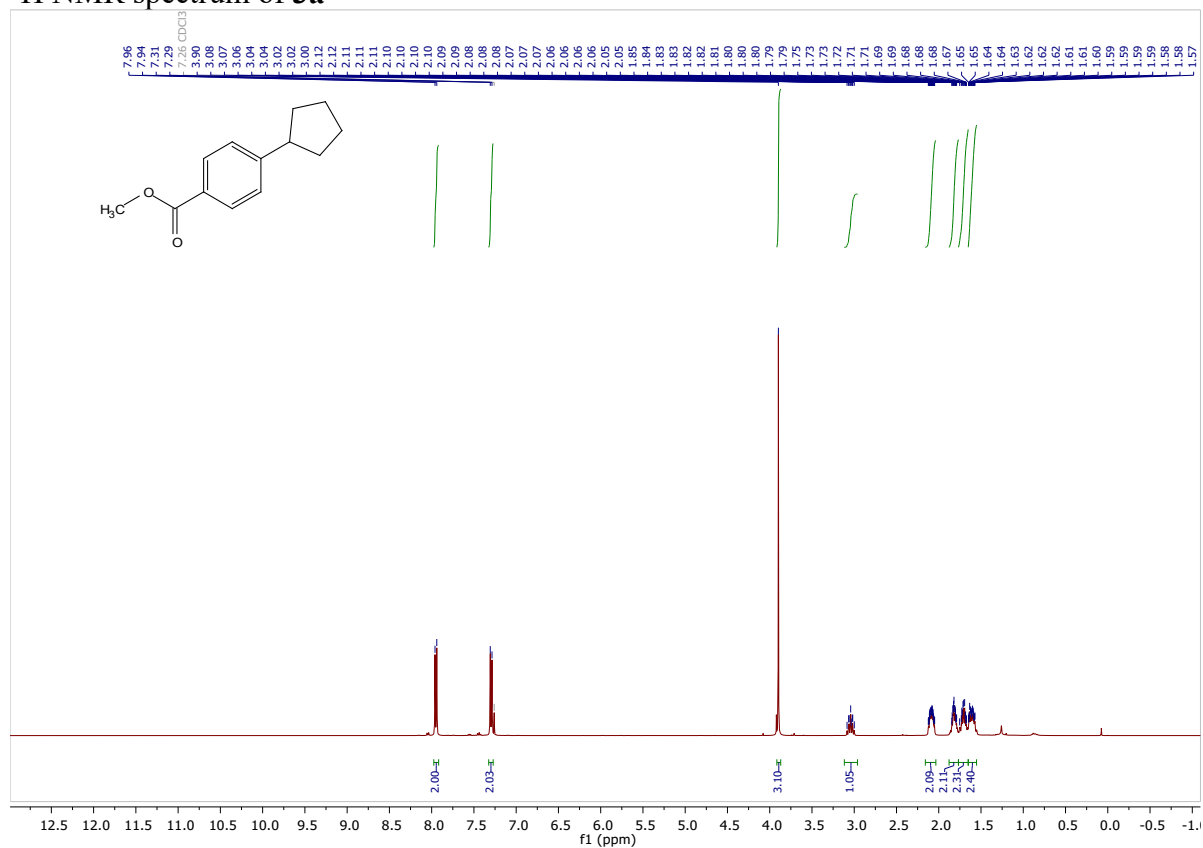

### <sup>13</sup>C NMR spectrum of 3a

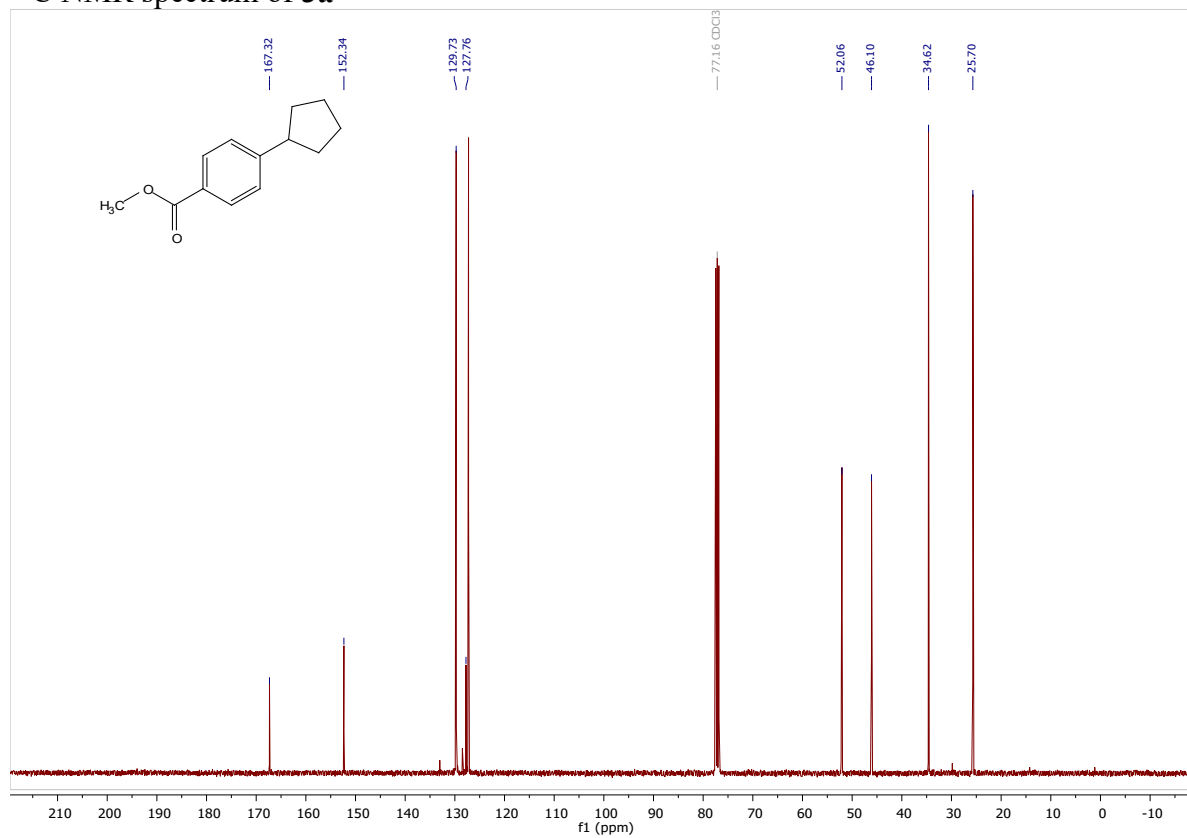

### <sup>1</sup>H NMR spectrum of **3b**

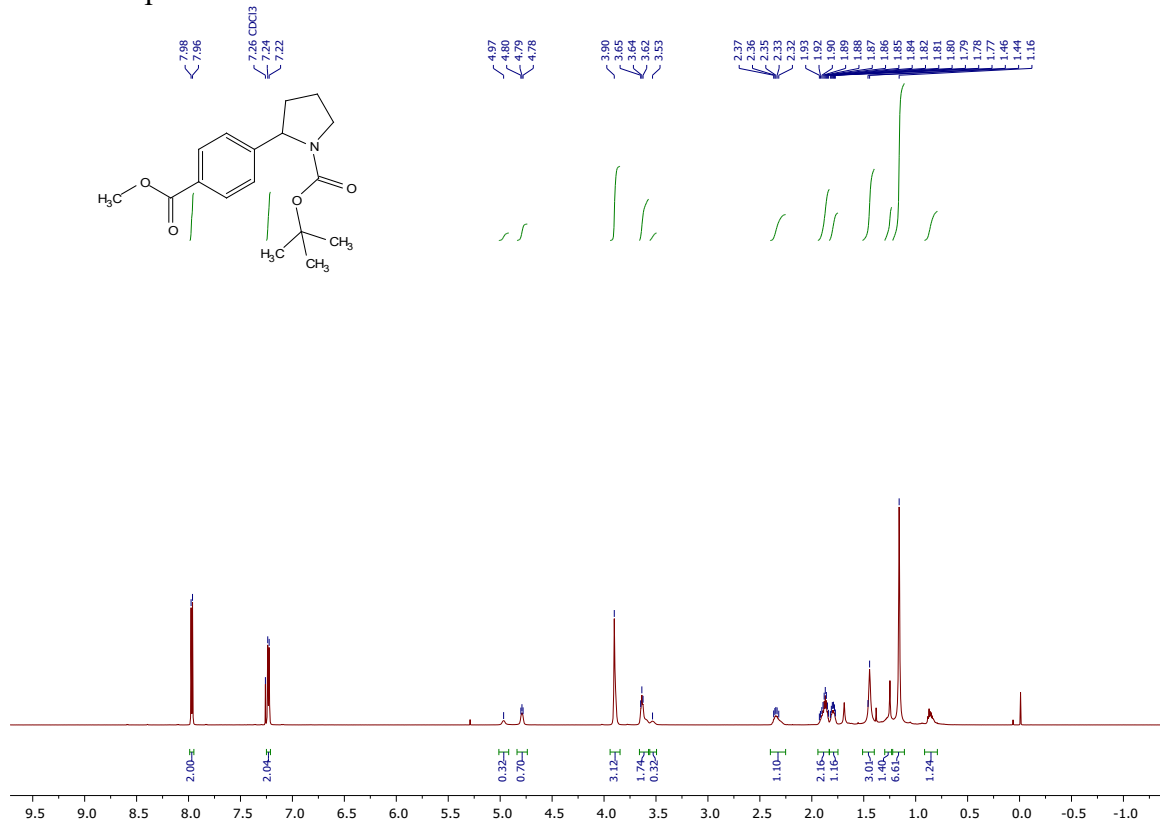

### <sup>13</sup>C NMR spectrum of **3b**

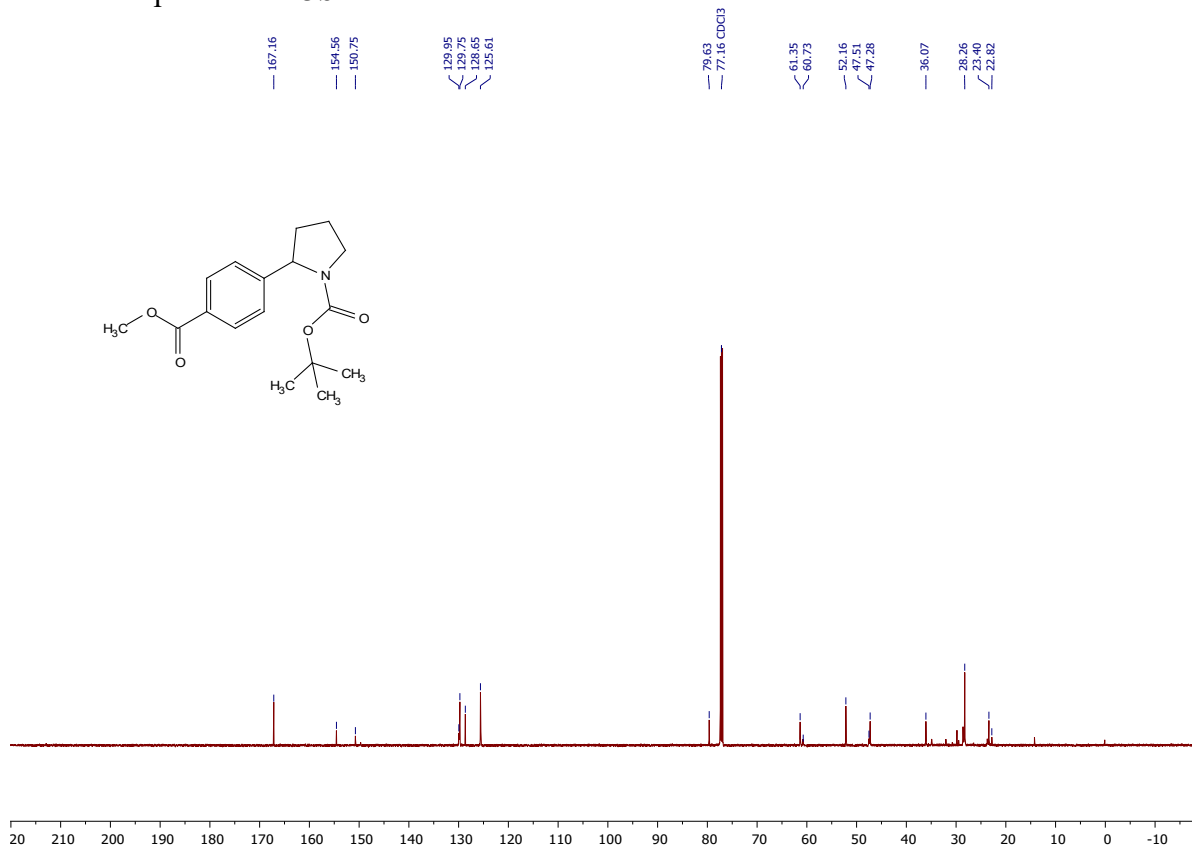



<sup>1</sup>H NMR spectrum of **3c**

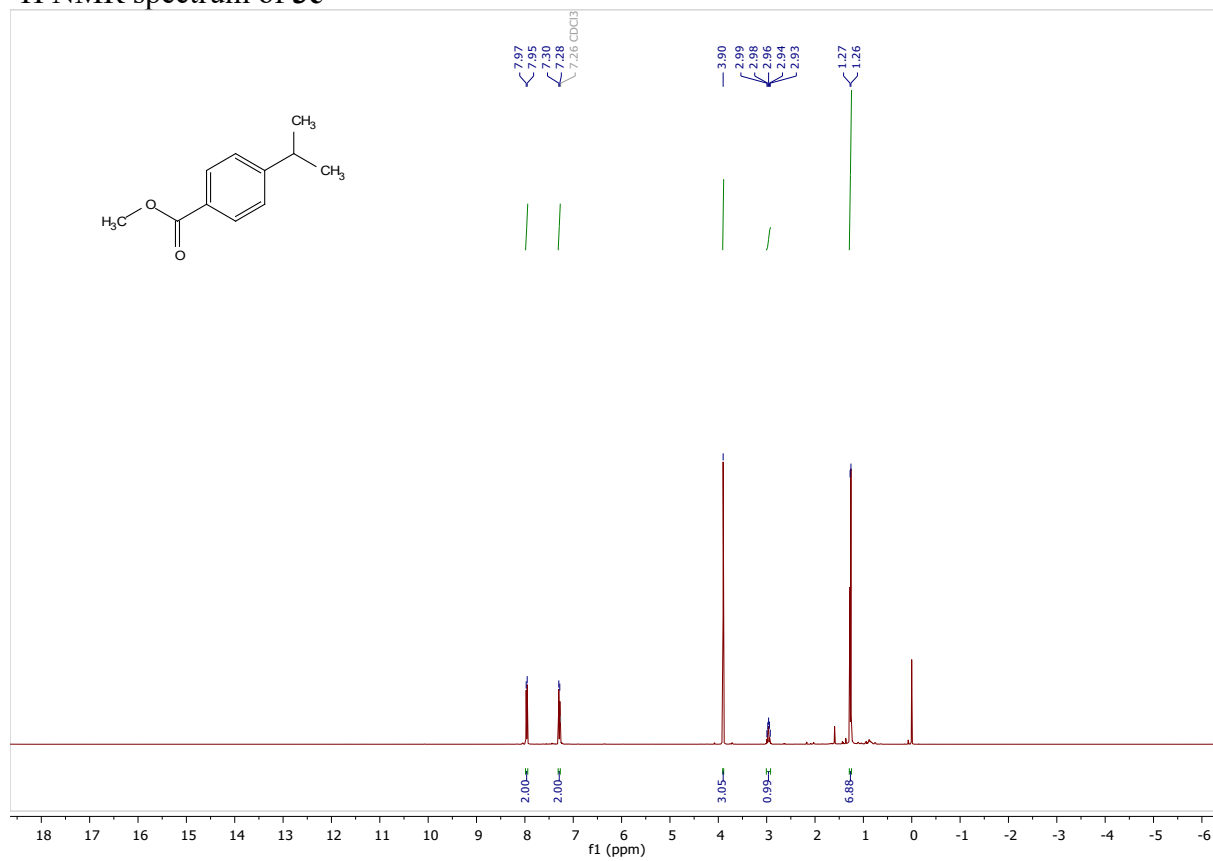

<sup>13</sup>C NMR spectrum of **3c**

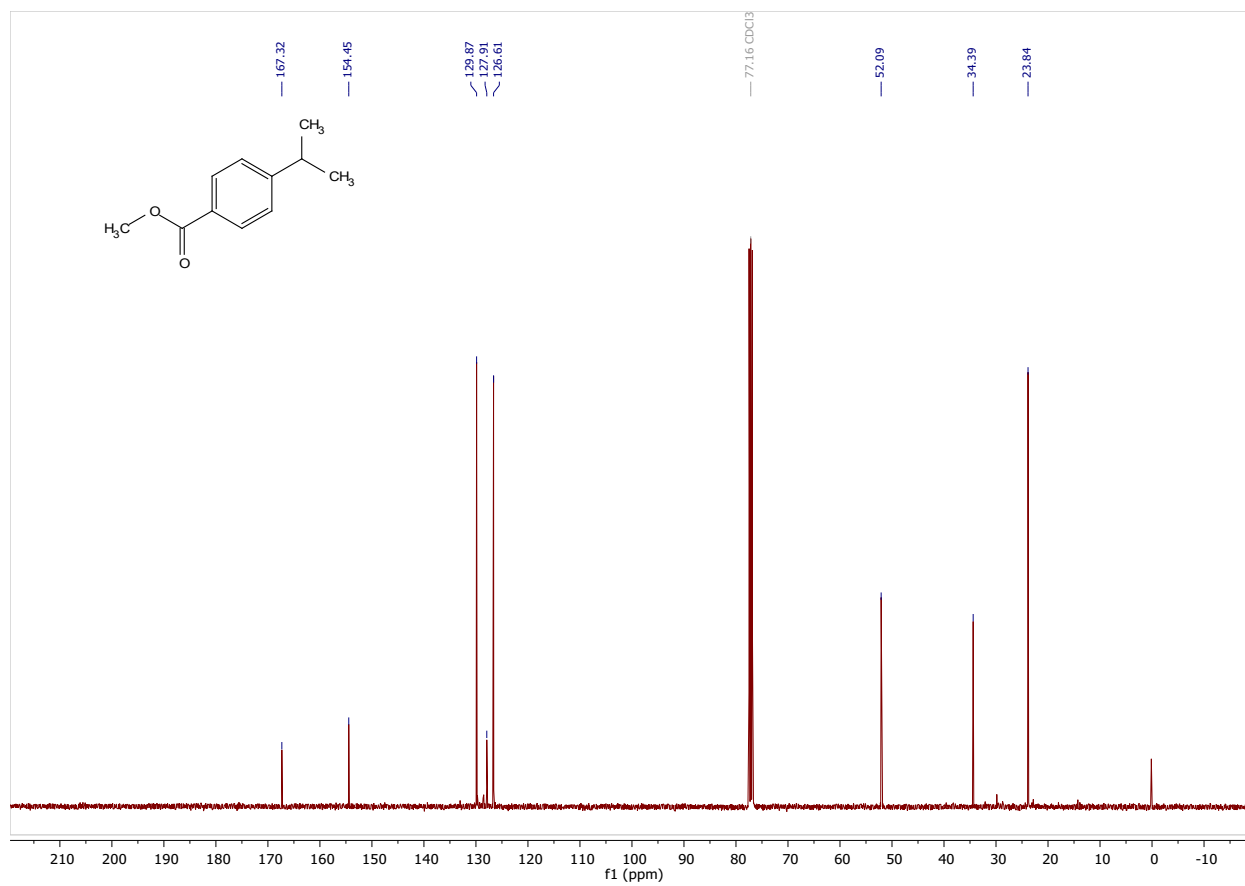

<sup>13</sup>C NMR spectrum of **3d**

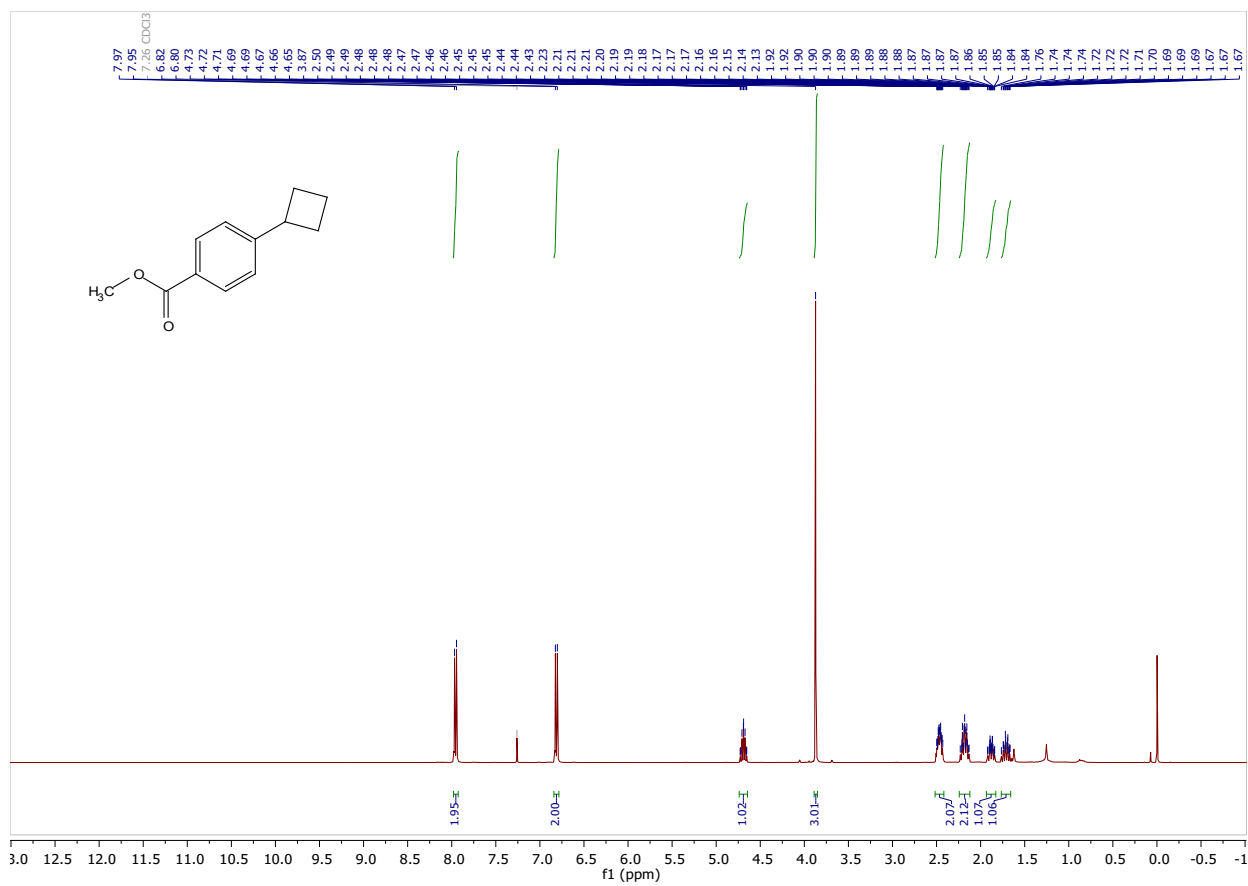

<sup>13</sup>C NMR spectrum of **3d**

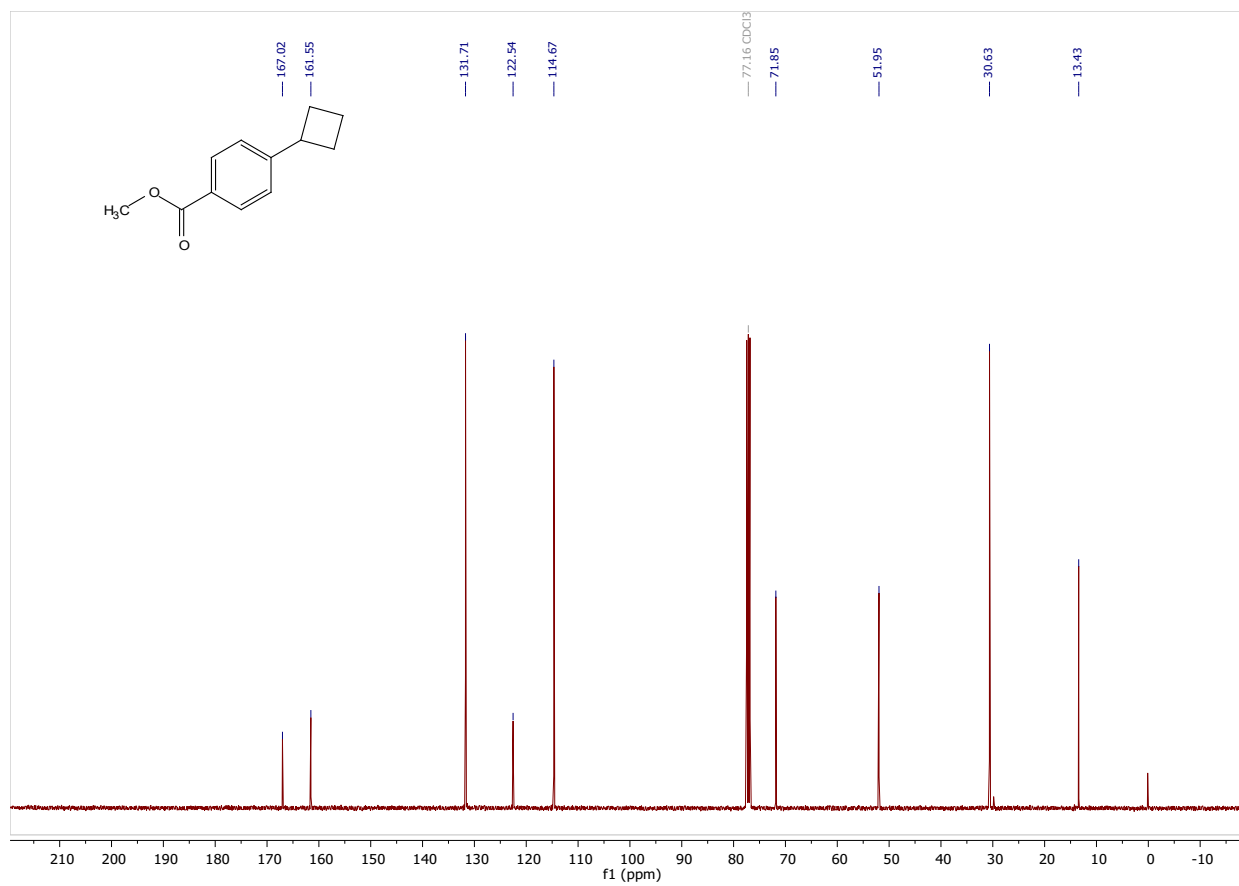

<sup>1</sup>H NMR spectrum of **3e**

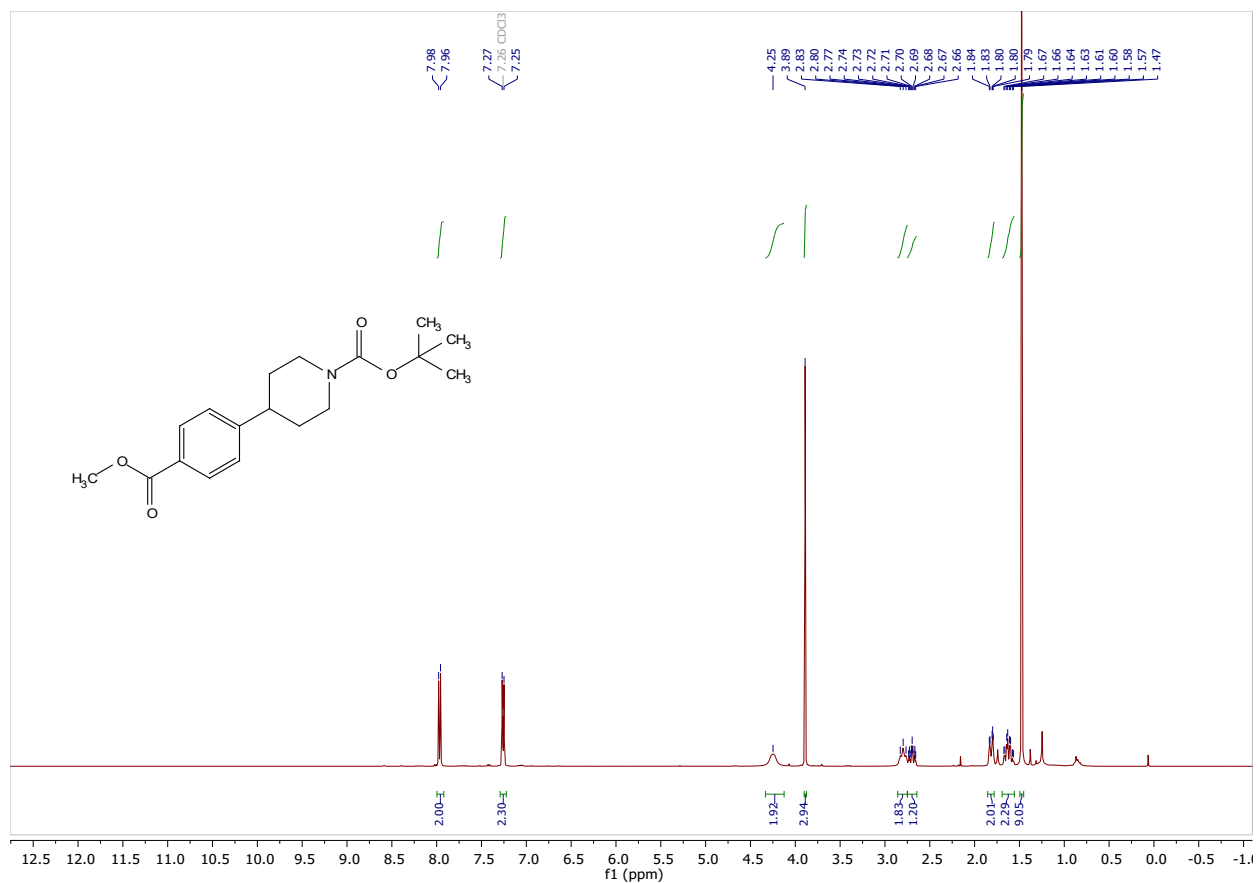

<sup>13</sup>C NMR spectrum of **3e**

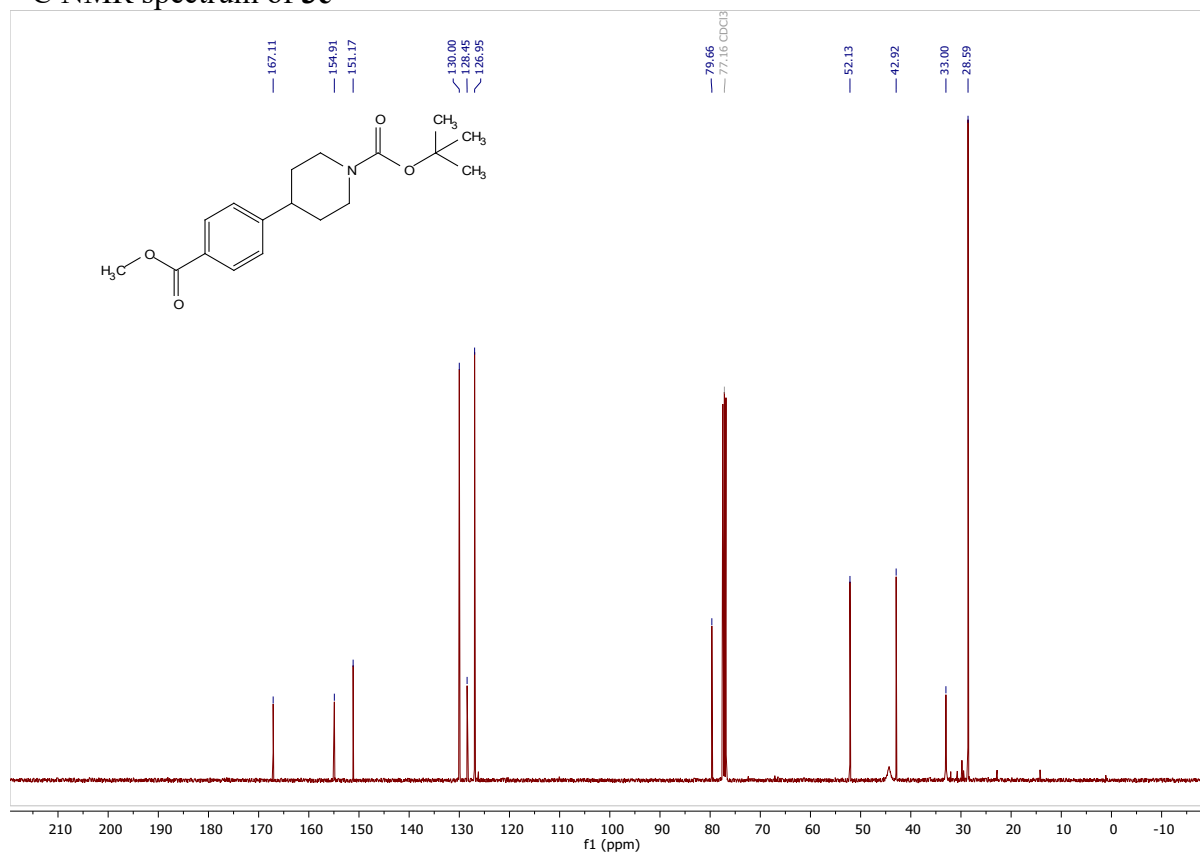

### <sup>1</sup>H NMR spectrum of **3f**

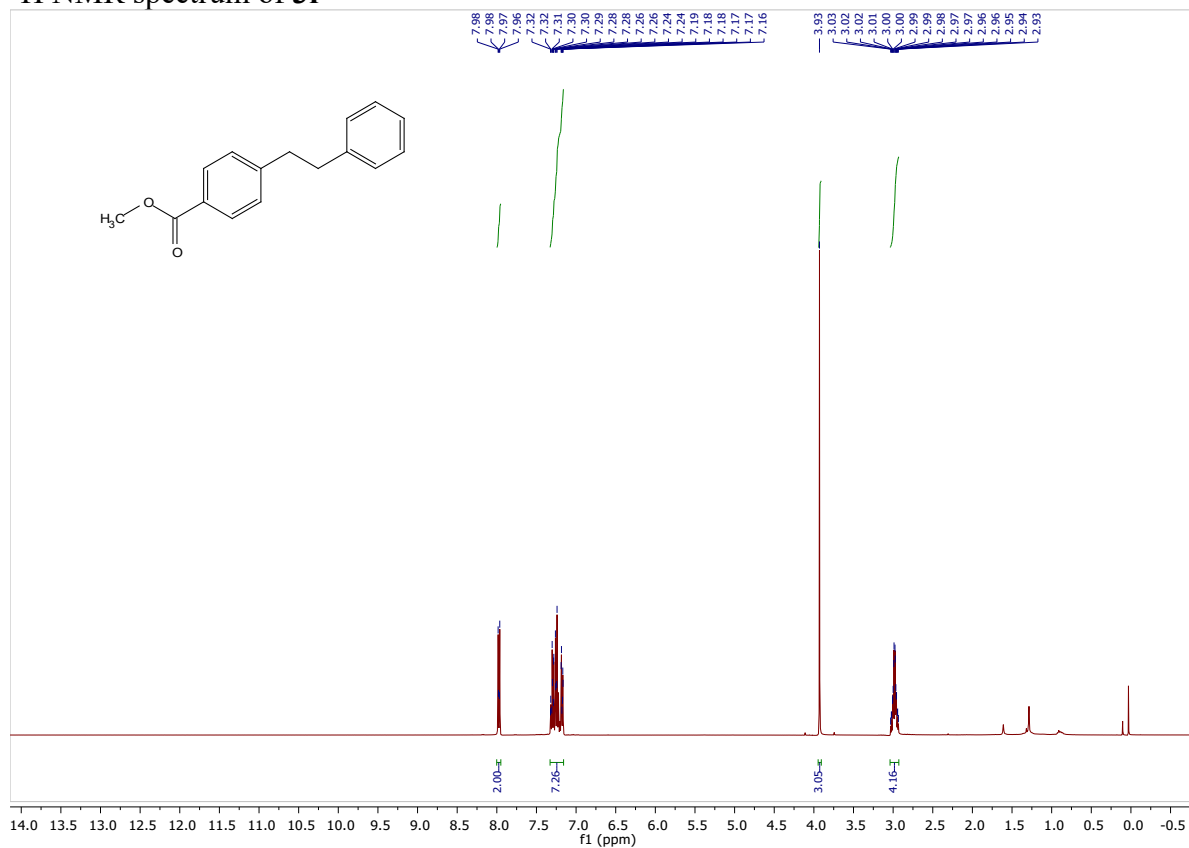

### <sup>13</sup>C NMR spectrum of **3f**

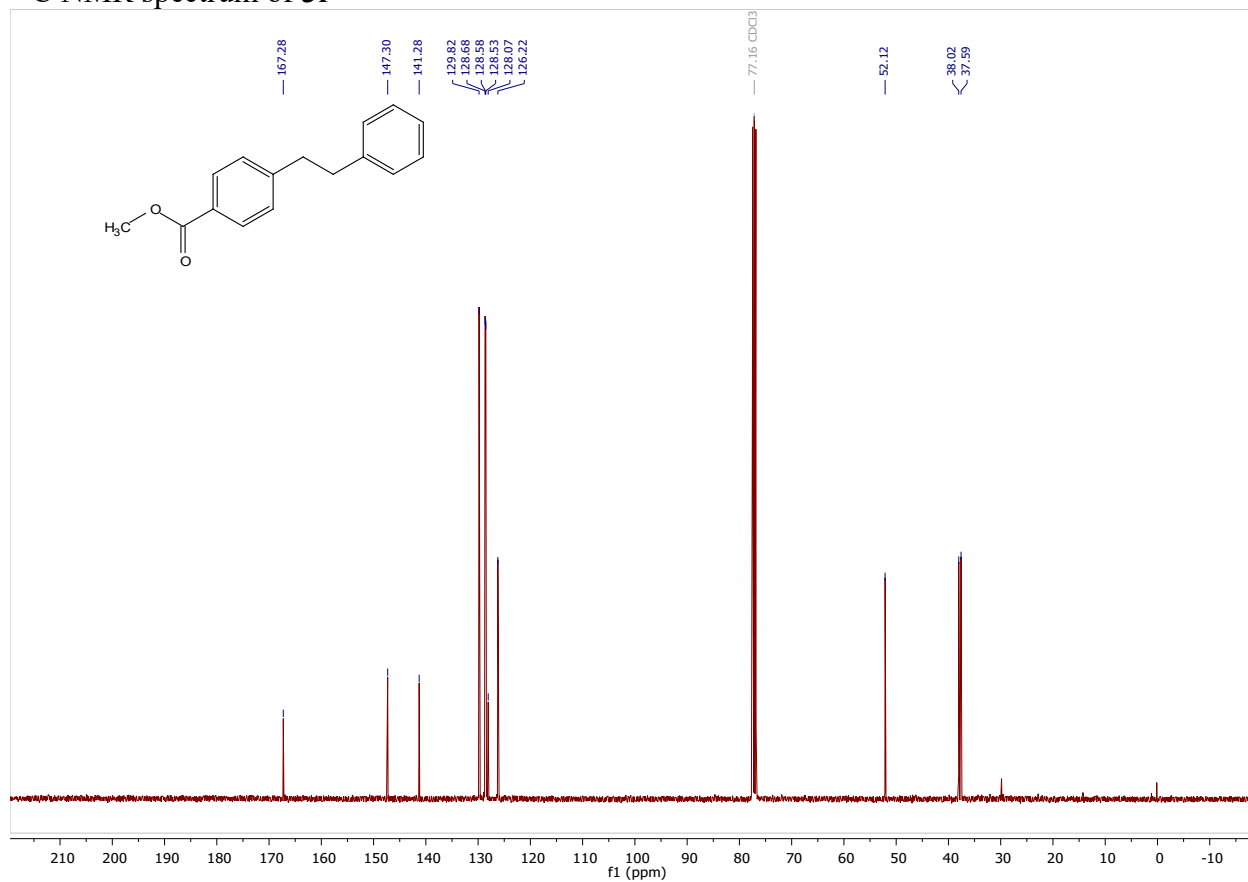

<sup>1</sup>H NMR spectrum of **3g**

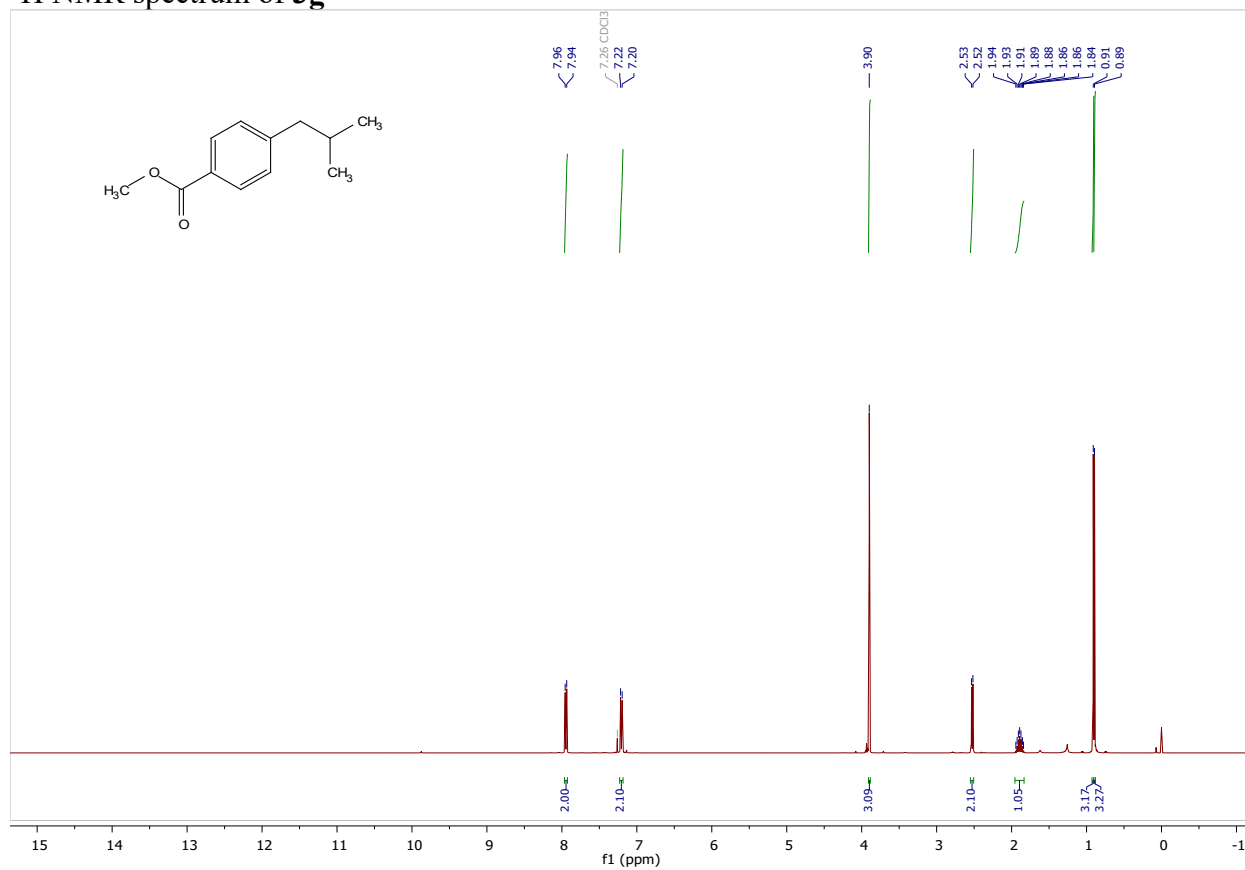

<sup>13</sup>C NMR spectrum of **3g**

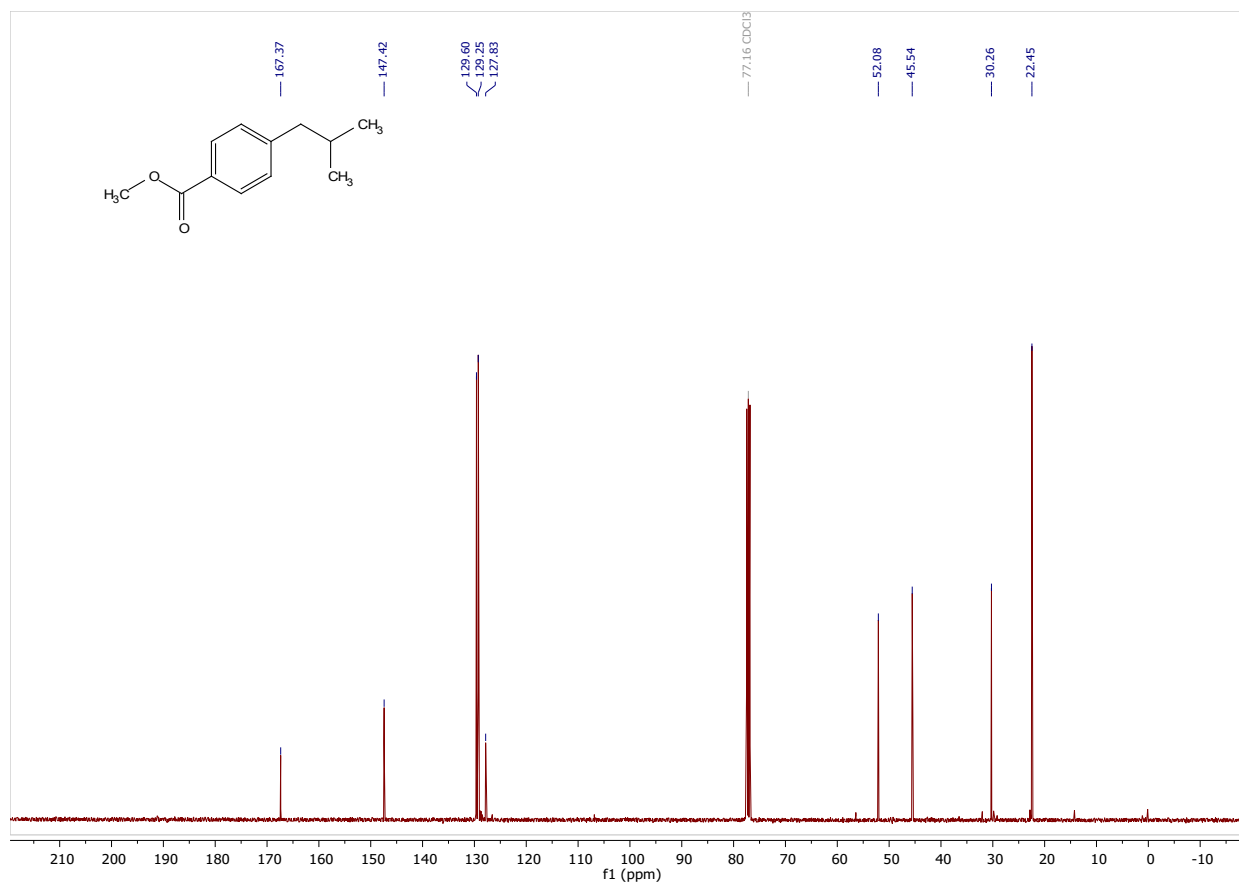

<sup>1</sup>H NMR spectrum of **3h**



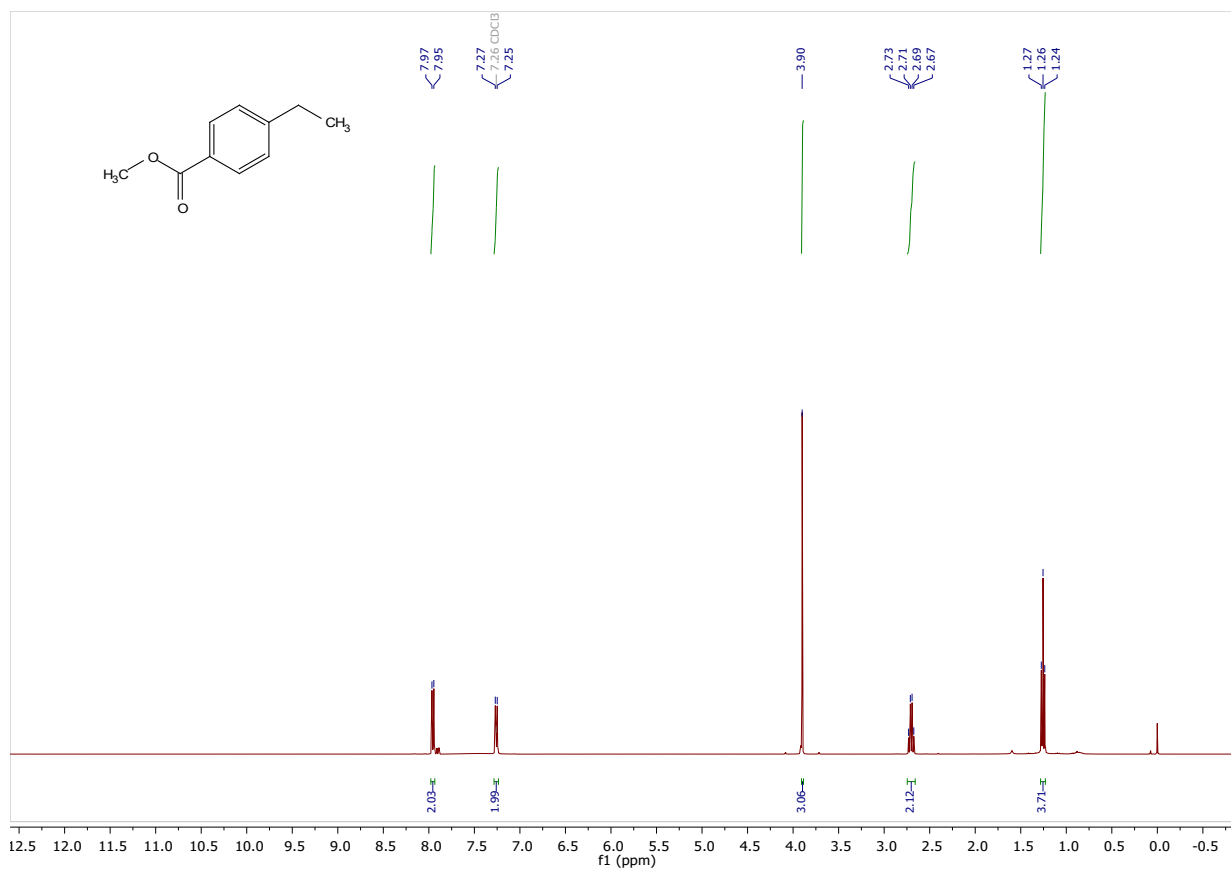

**<sup>13</sup>C NMR spectrum of 3h**

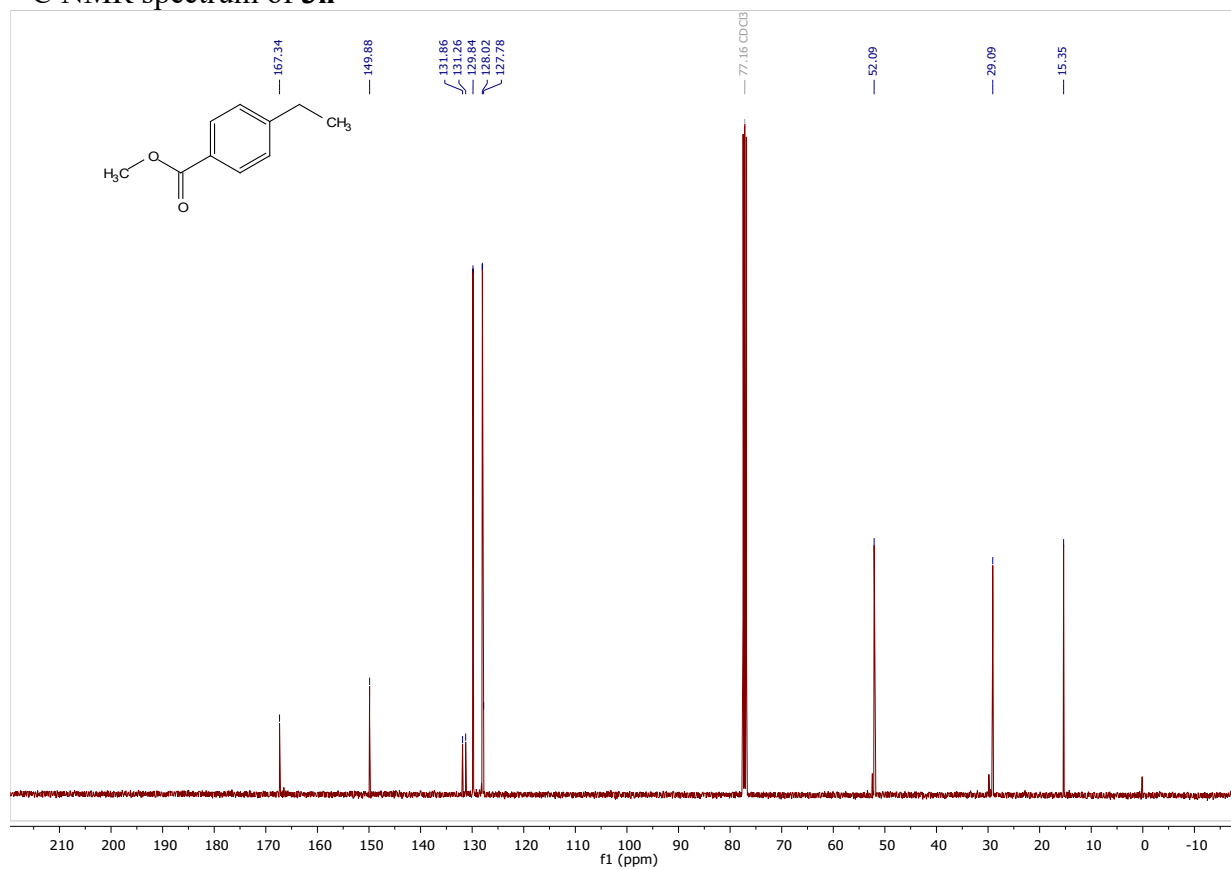

### <sup>1</sup>H NMR spectrum of **3i**

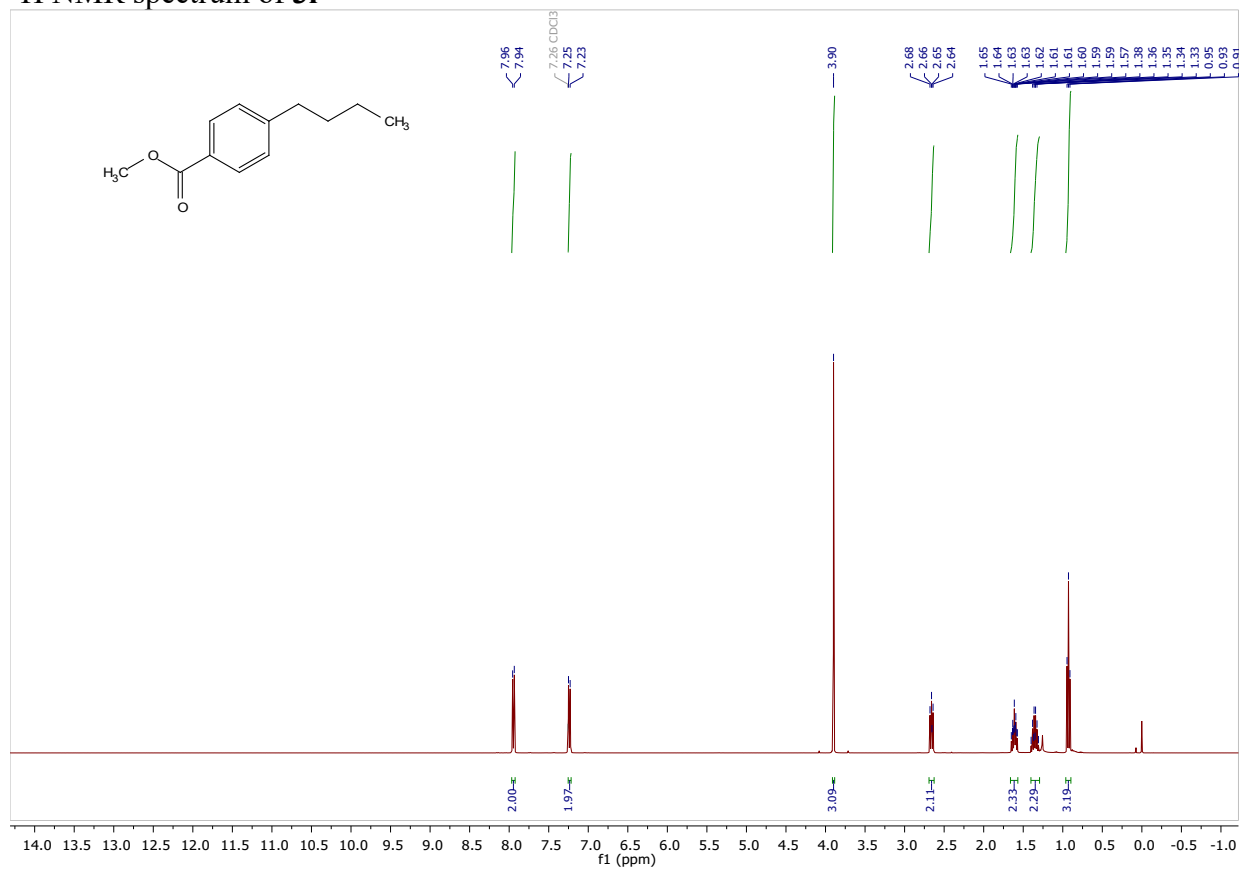

### <sup>13</sup>C NMR spectrum of **3i**

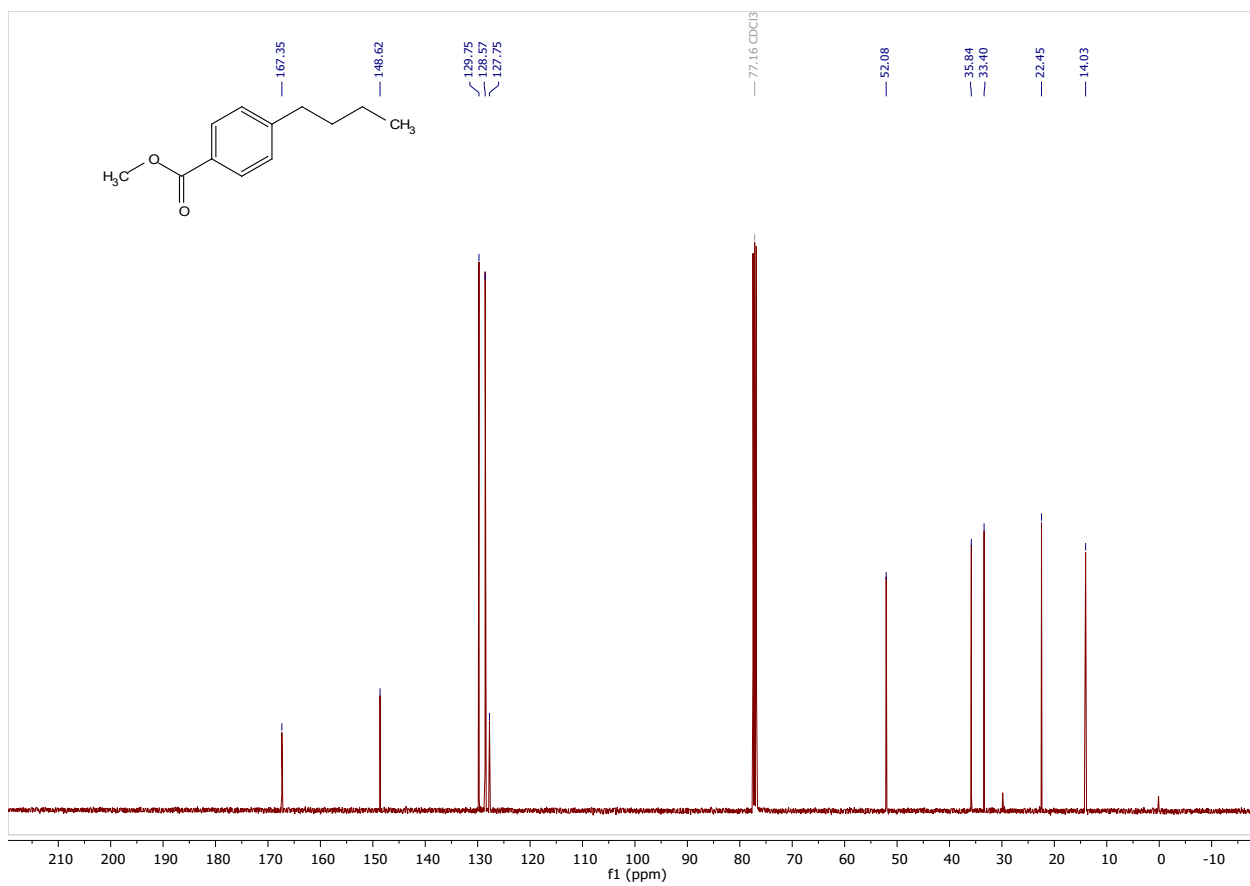

<sup>13</sup>C NMR spectrum of **3j**

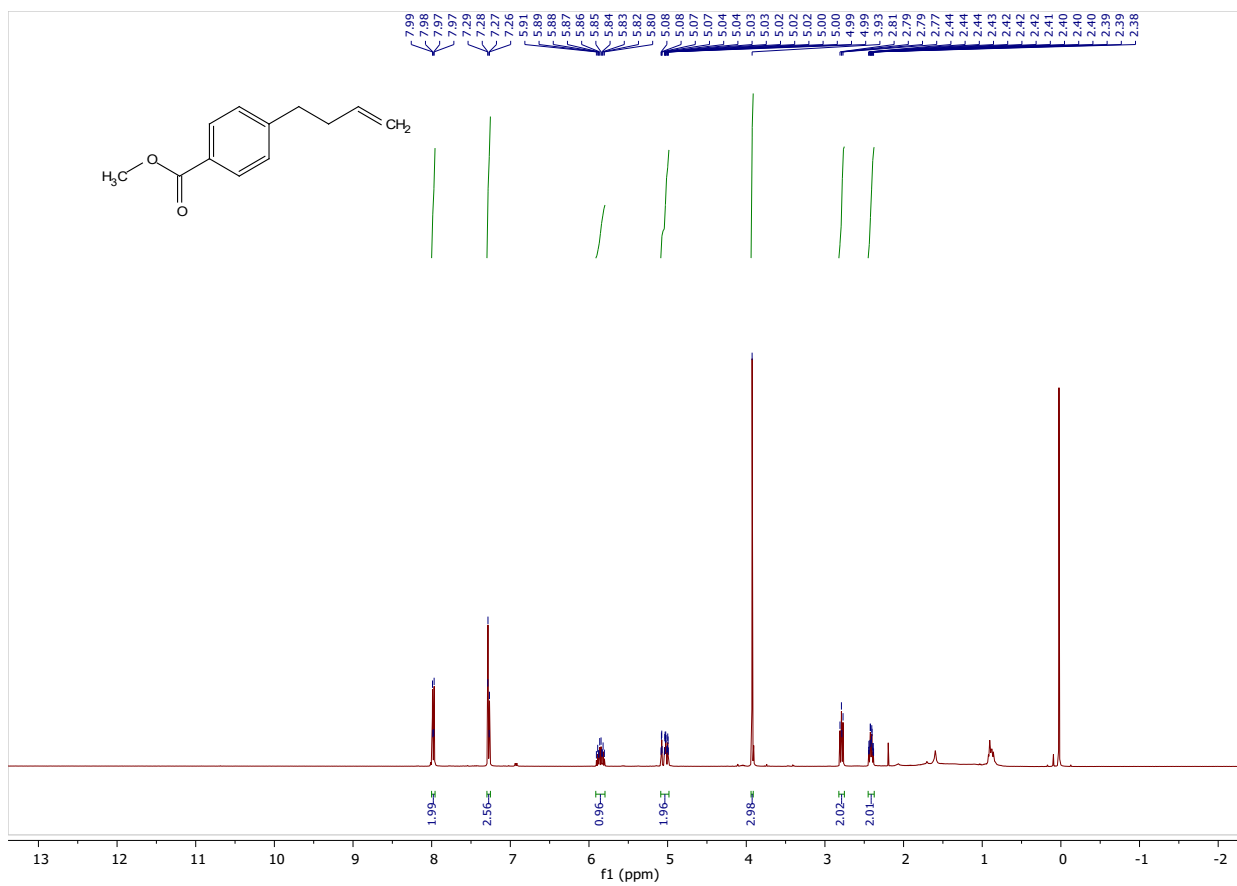

**<sup>13</sup>C NMR spectrum of 3j**

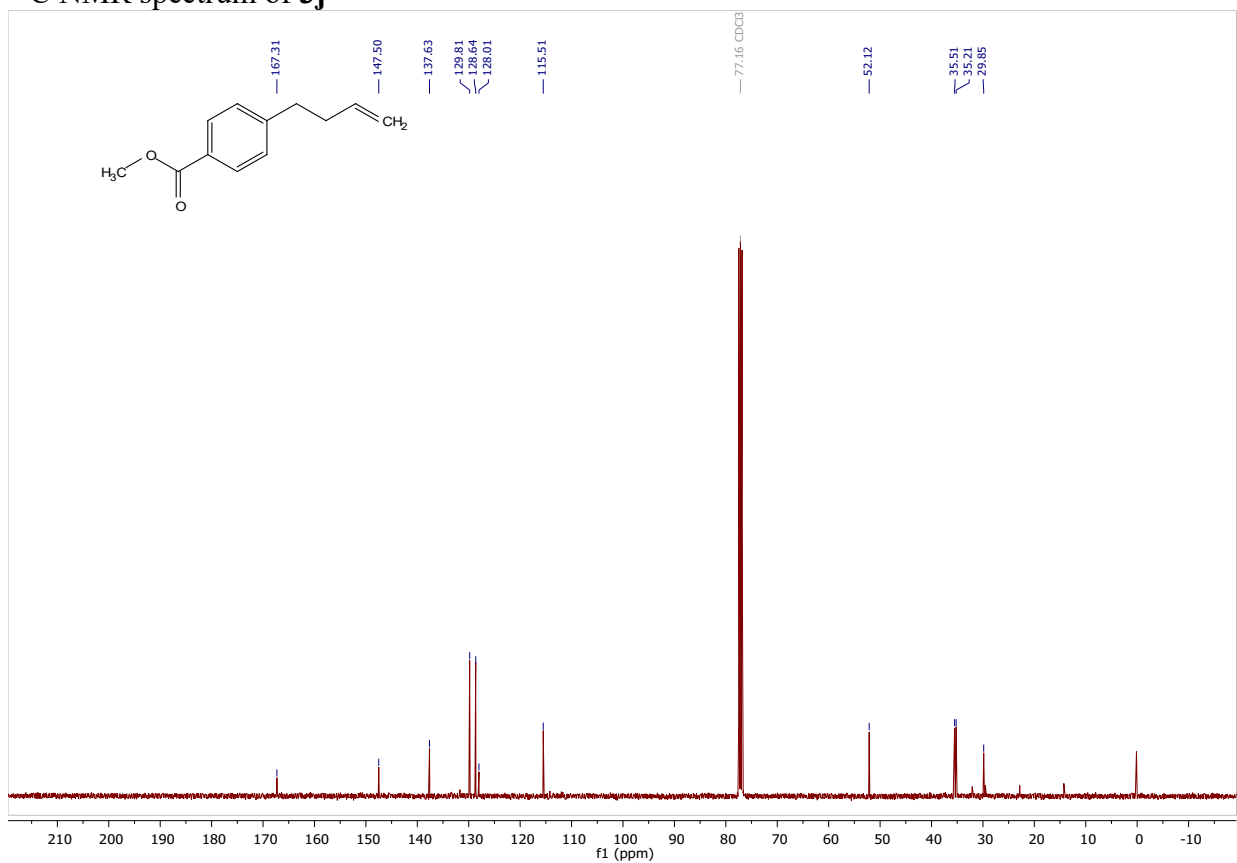

### <sup>1</sup>H NMR spectrum of **4a**

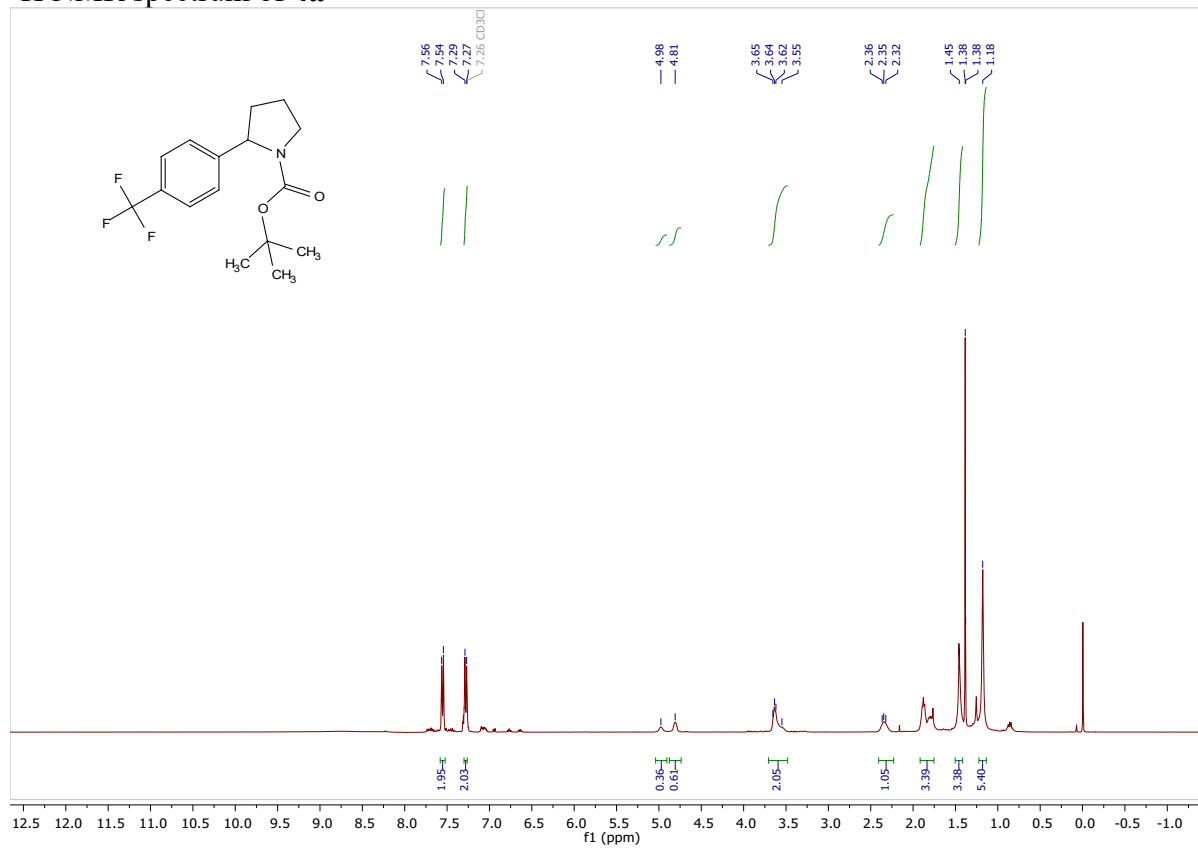

### <sup>13</sup>C NMR spectrum of **4a**

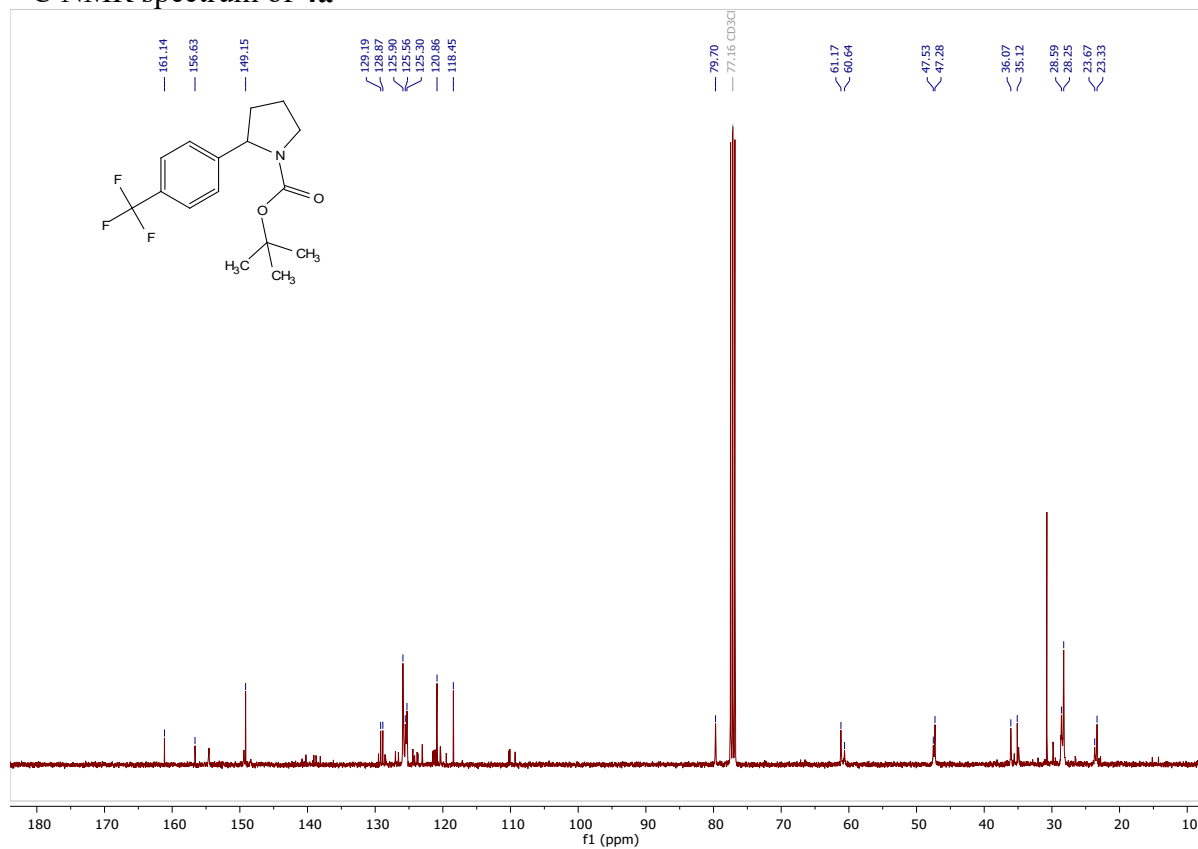

<sup>1</sup>H NMR spectrum of **4b**

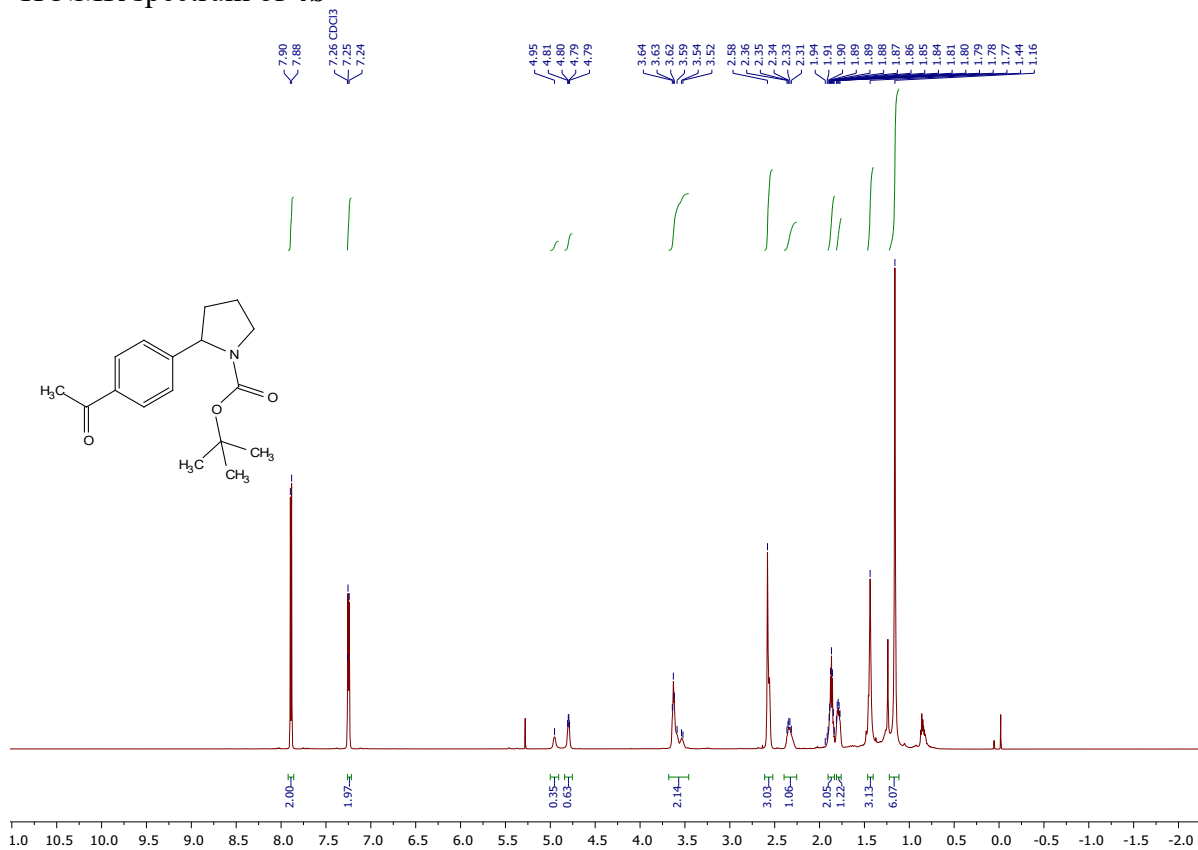

<sup>13</sup>C NMR spectrum of **4b**

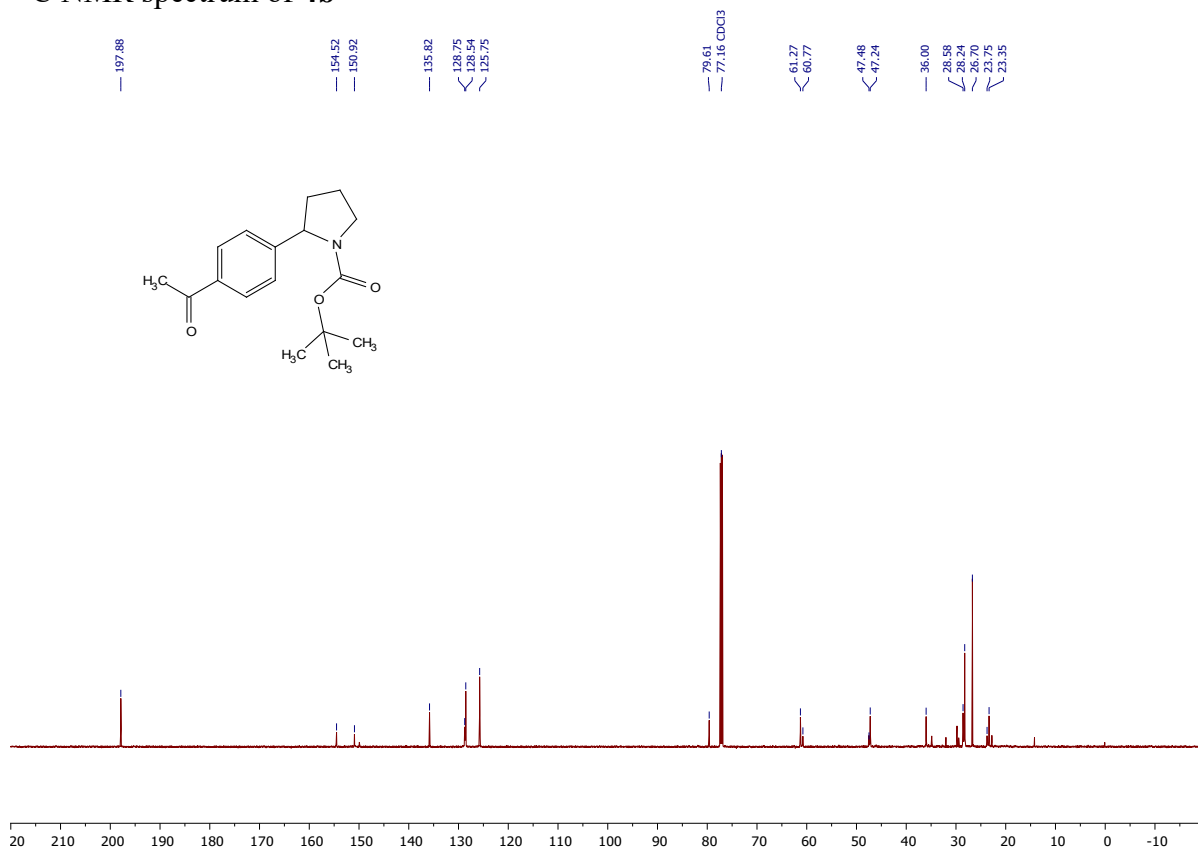

### <sup>1</sup>H NMR spectrum of **4c**

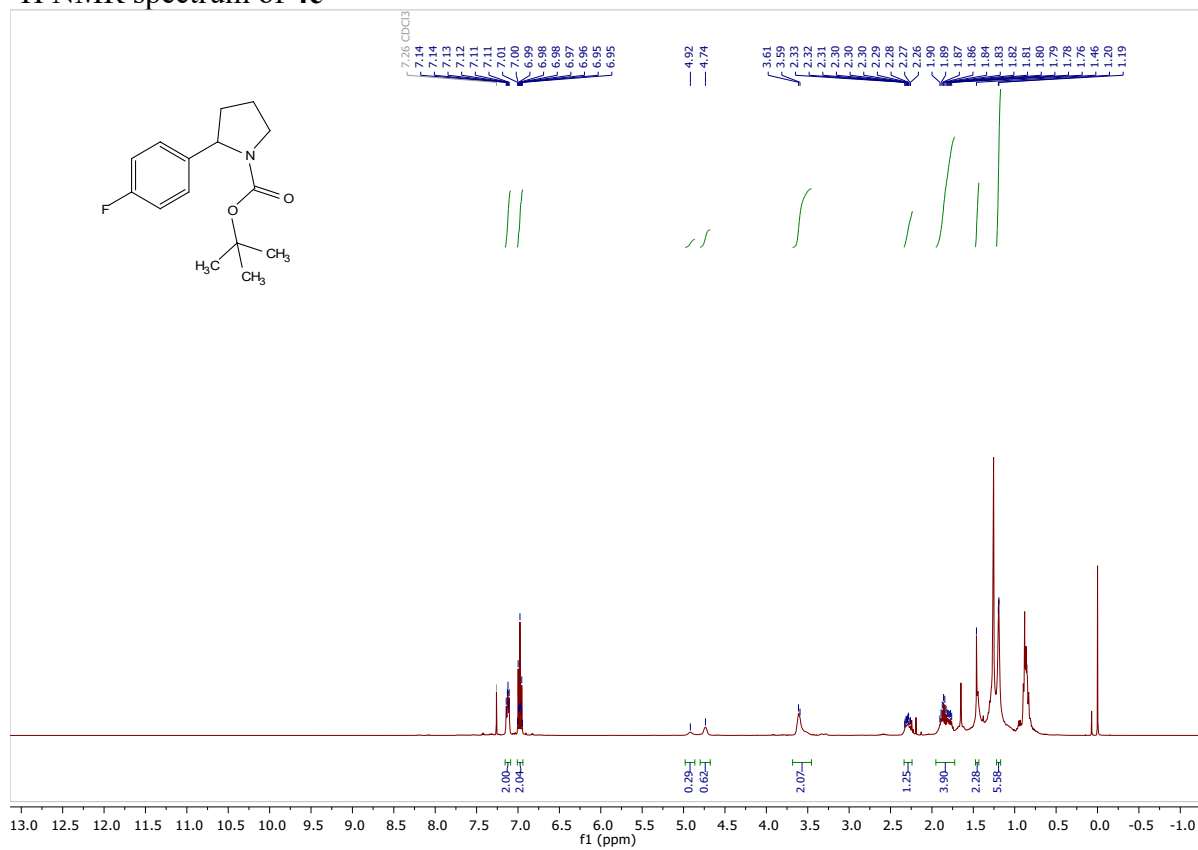

### <sup>19</sup>F NMR spectrum of **4c**

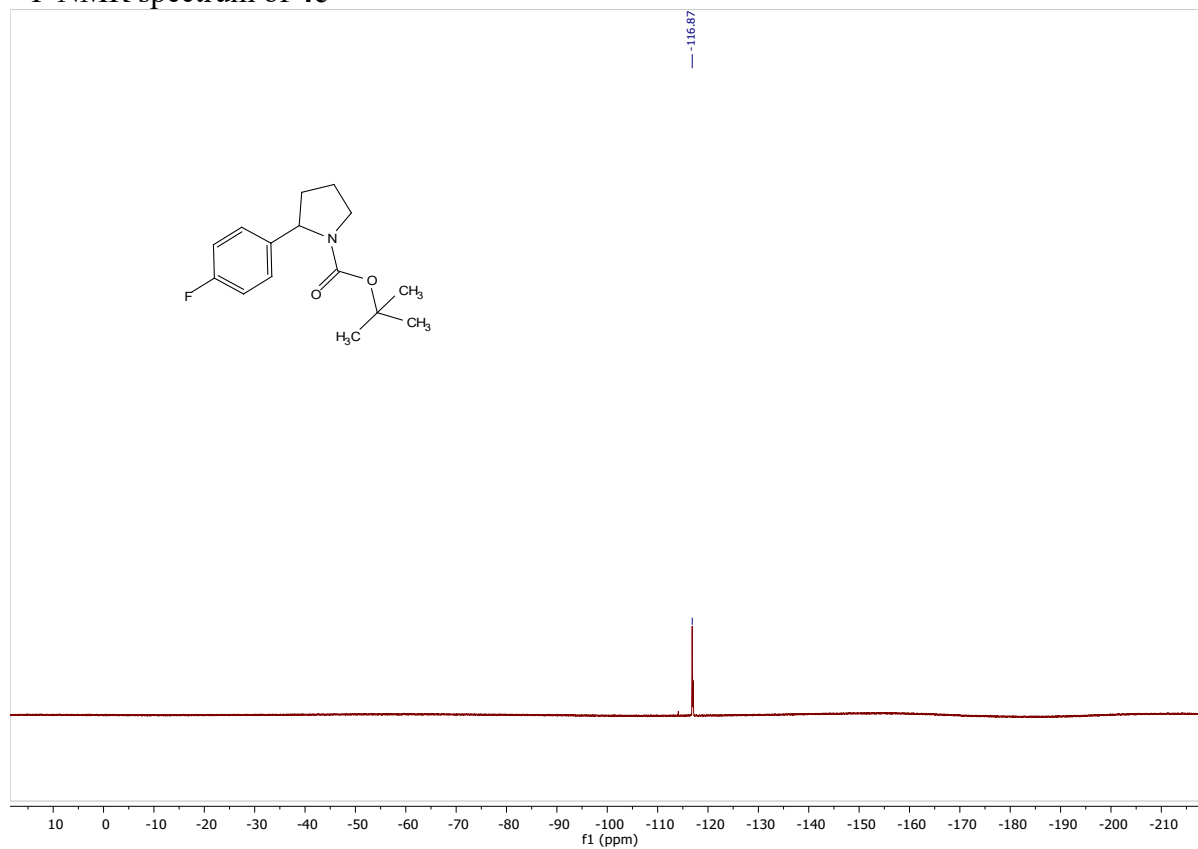

<sup>1</sup>H NMR spectrum of **4d**

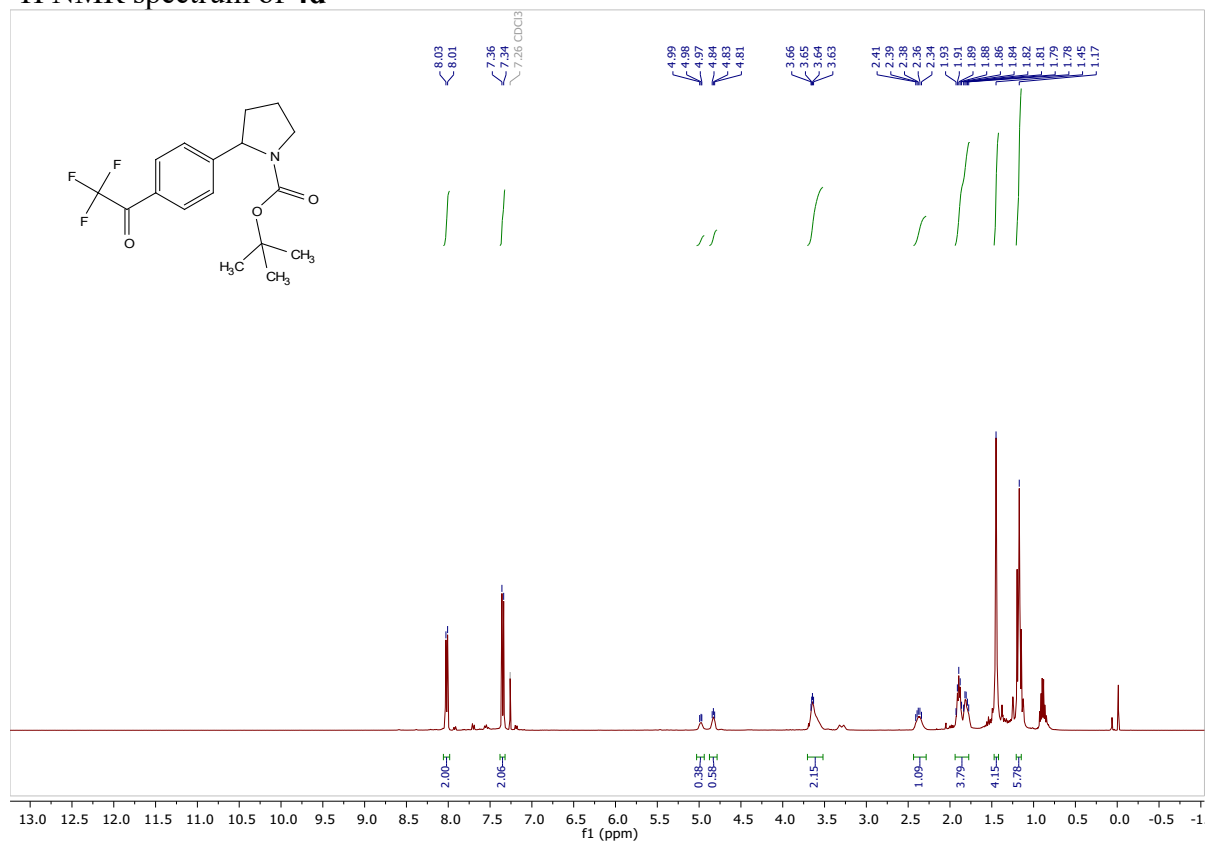

<sup>13</sup>C NMR spectrum of **4d**

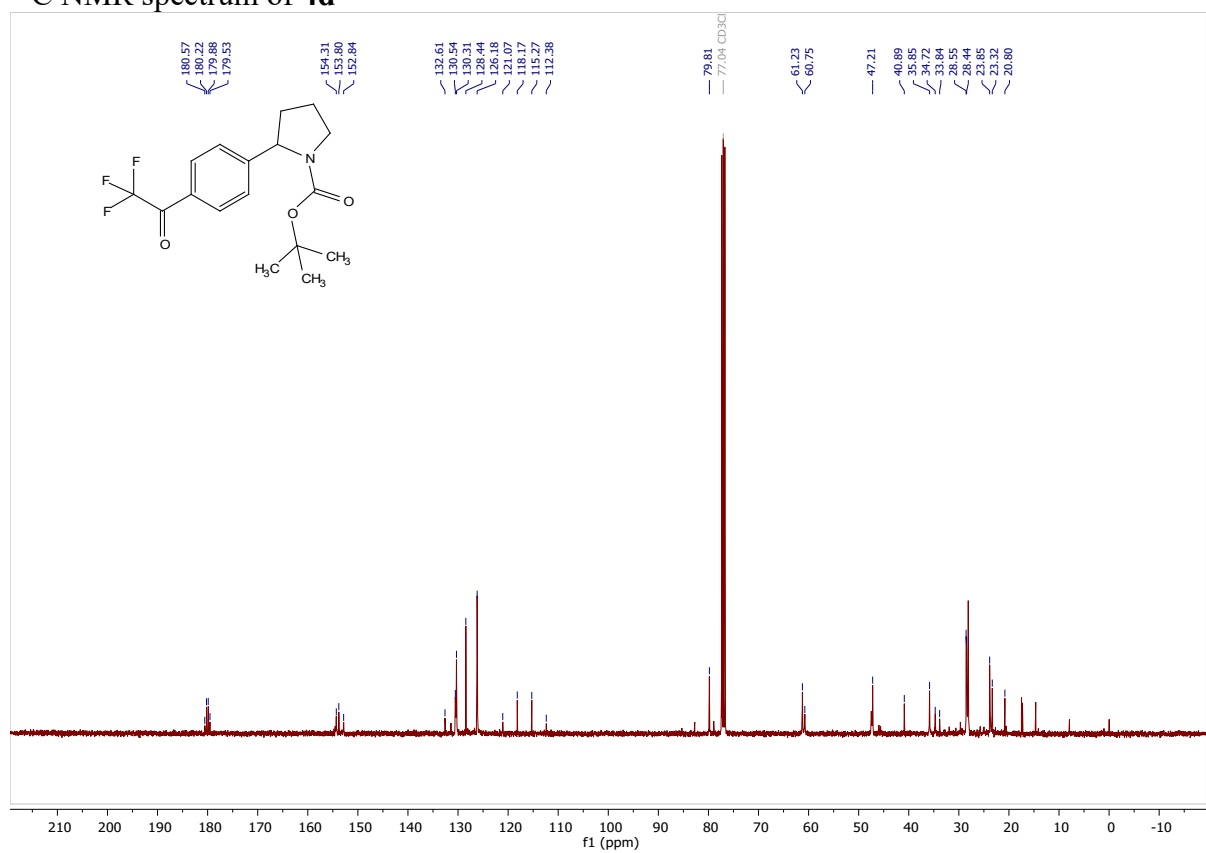



### $^{19}\text{F}$ NMR spectrum of **4d**

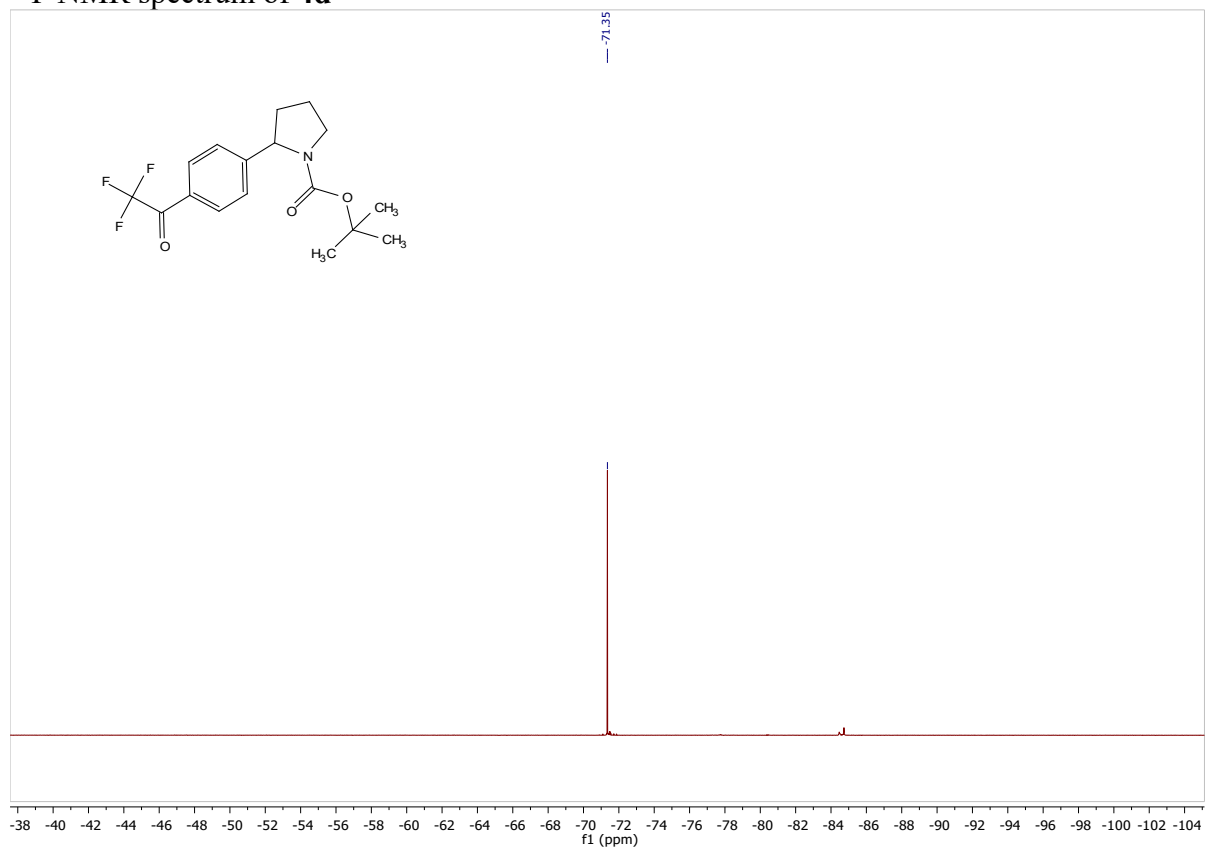

### $^1\text{H}$ NMR spectrum of **4e**

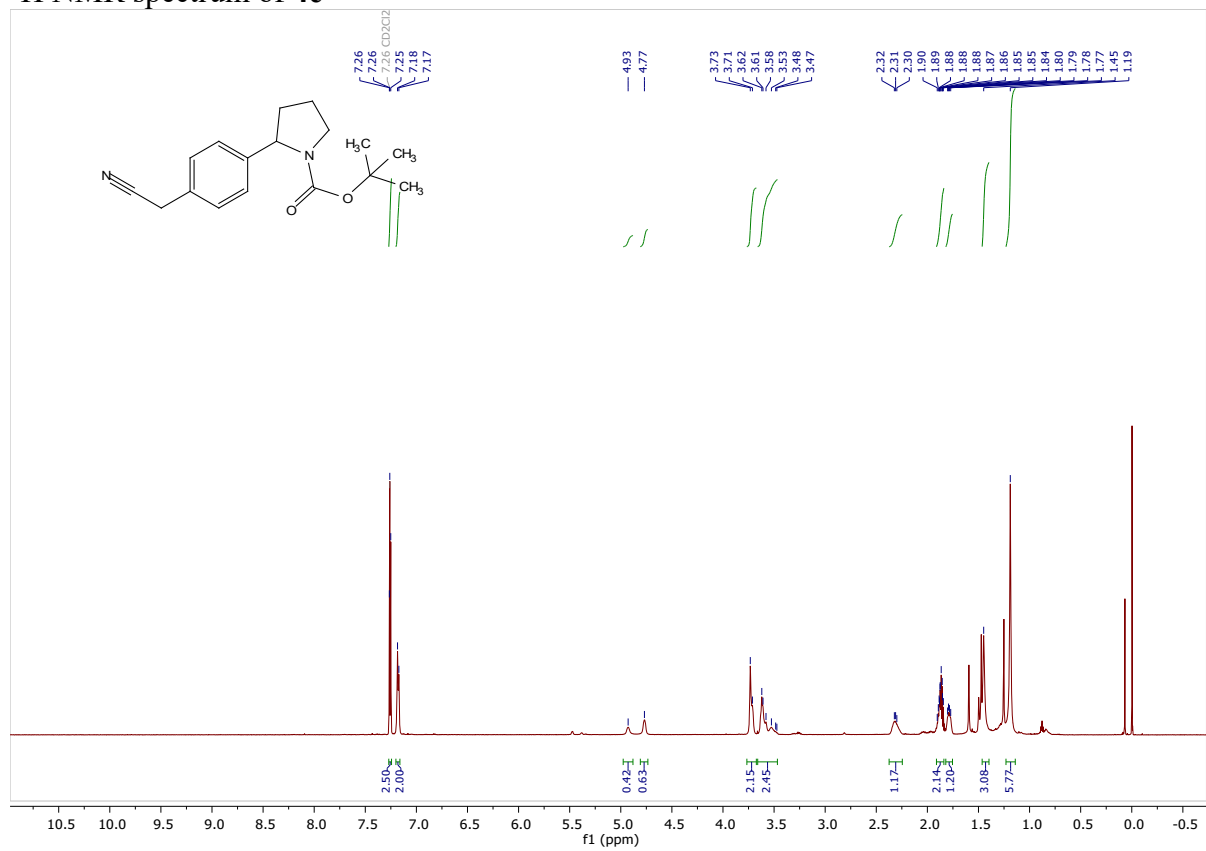

$^{13}\text{C}$  NMR spectrum of **4e**

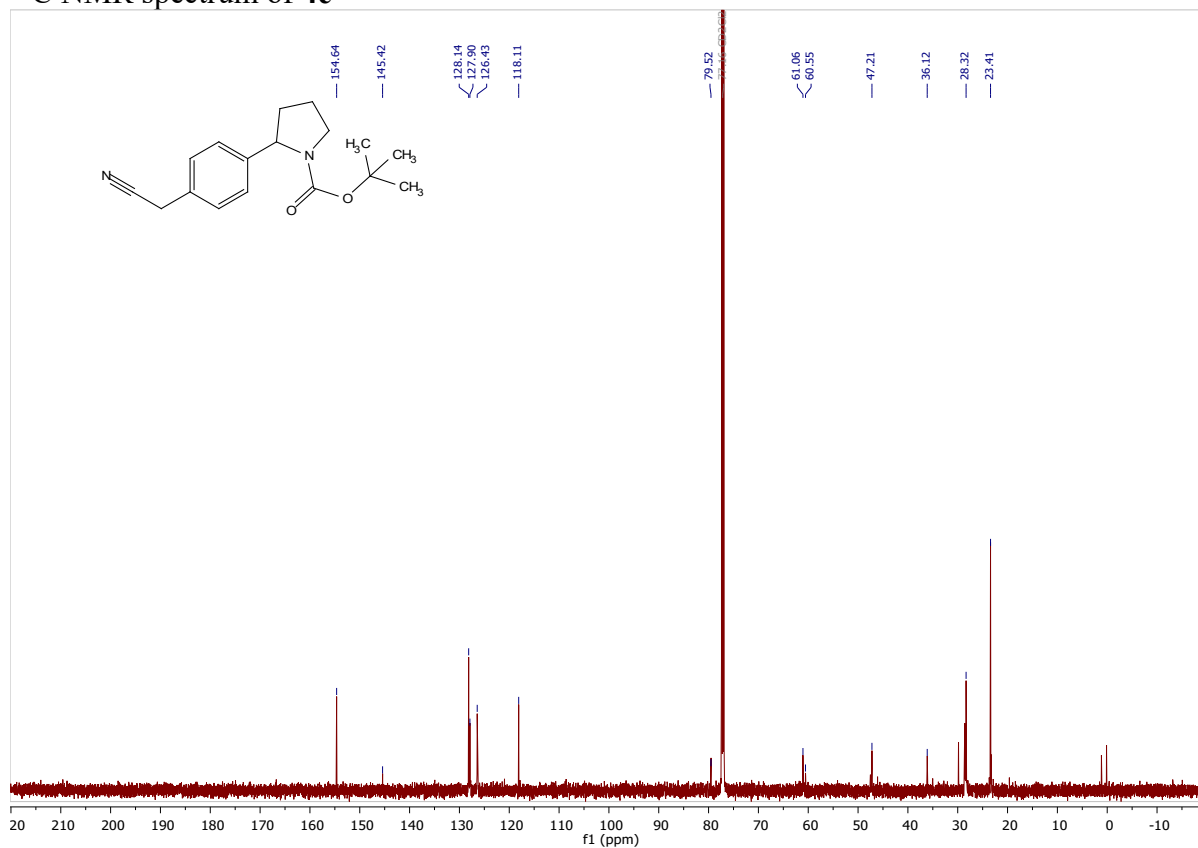

$^1\text{H}$  NMR spectrum of **4g**

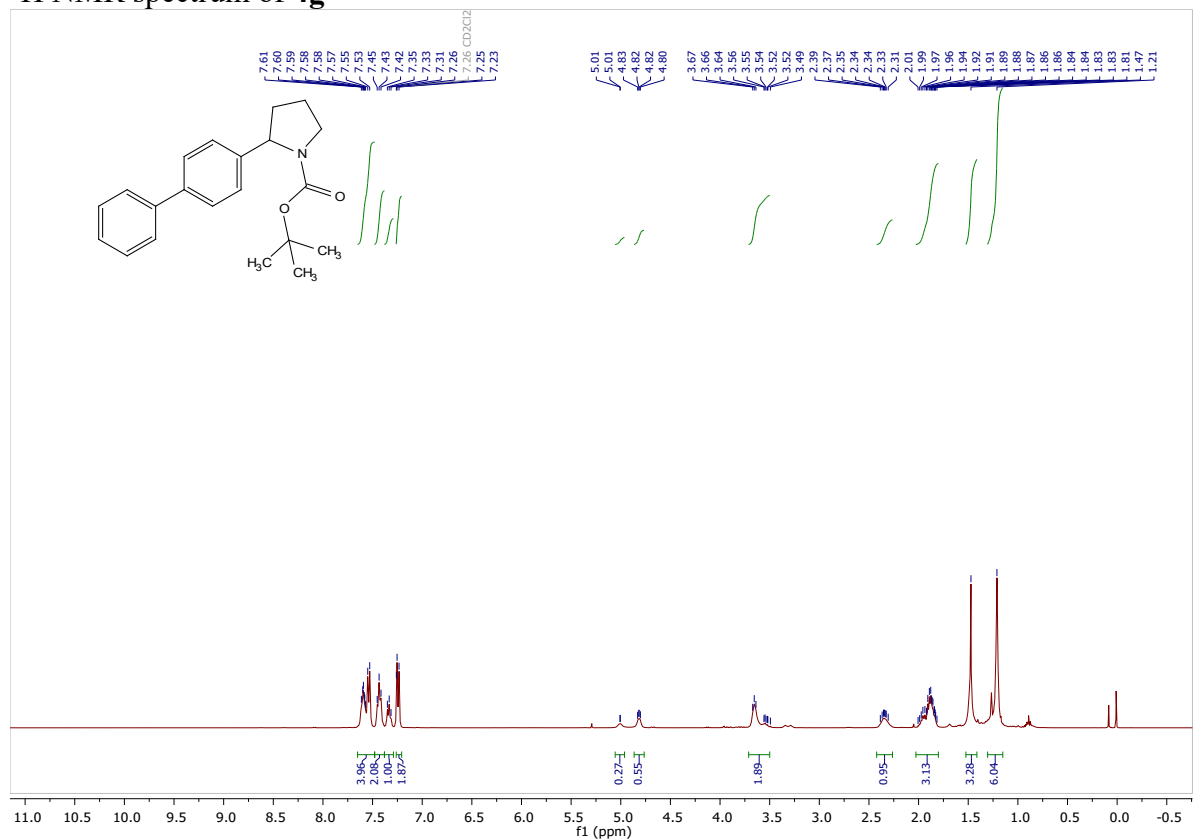

<sup>13</sup>C NMR spectrum of **4g**

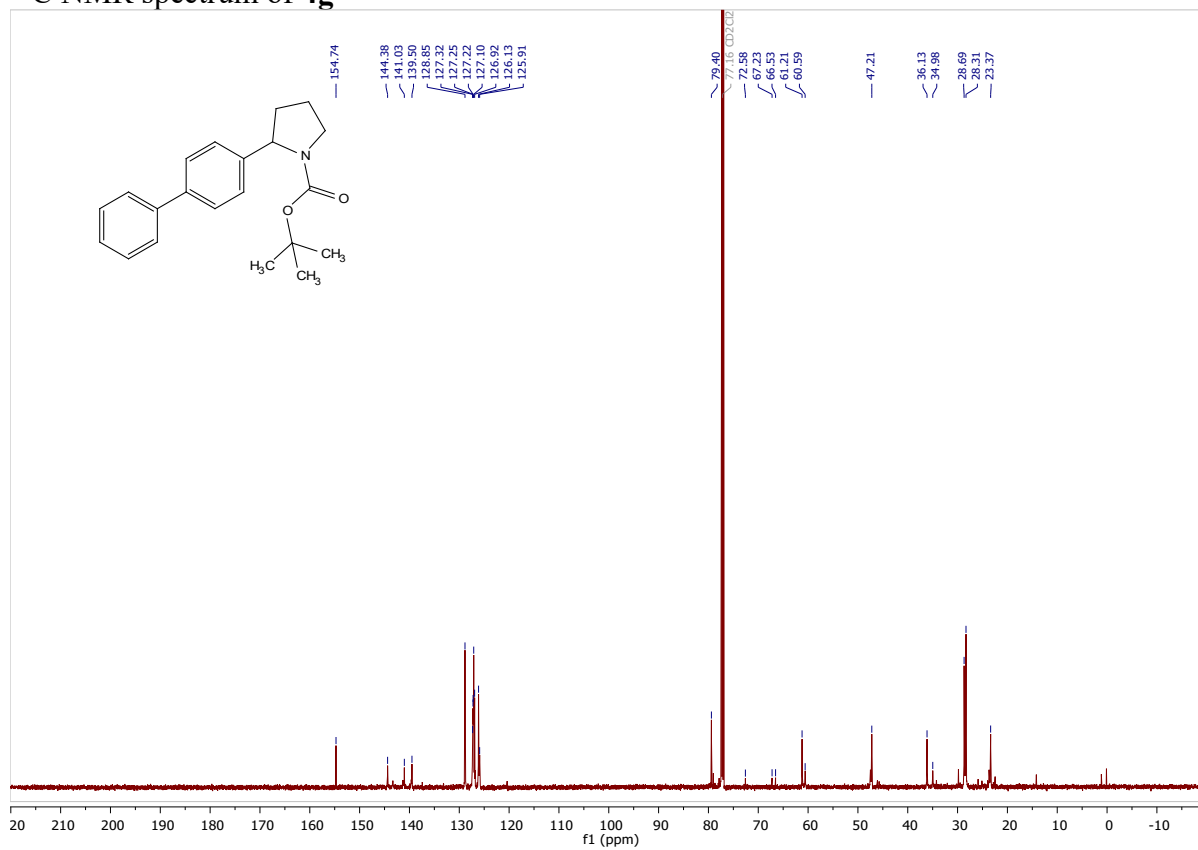

<sup>1</sup>H NMR spectrum of **4i**

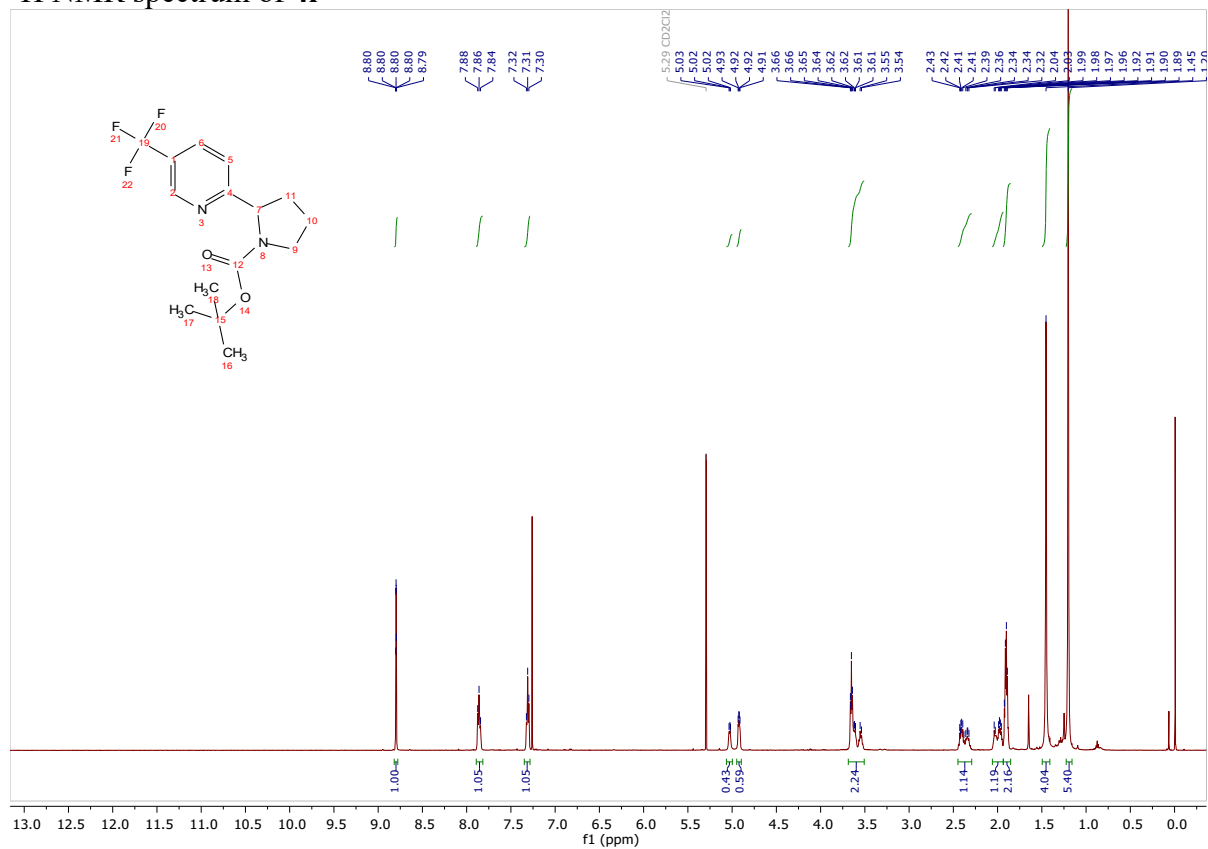

### <sup>13</sup>C NMR spectrum of **4i**

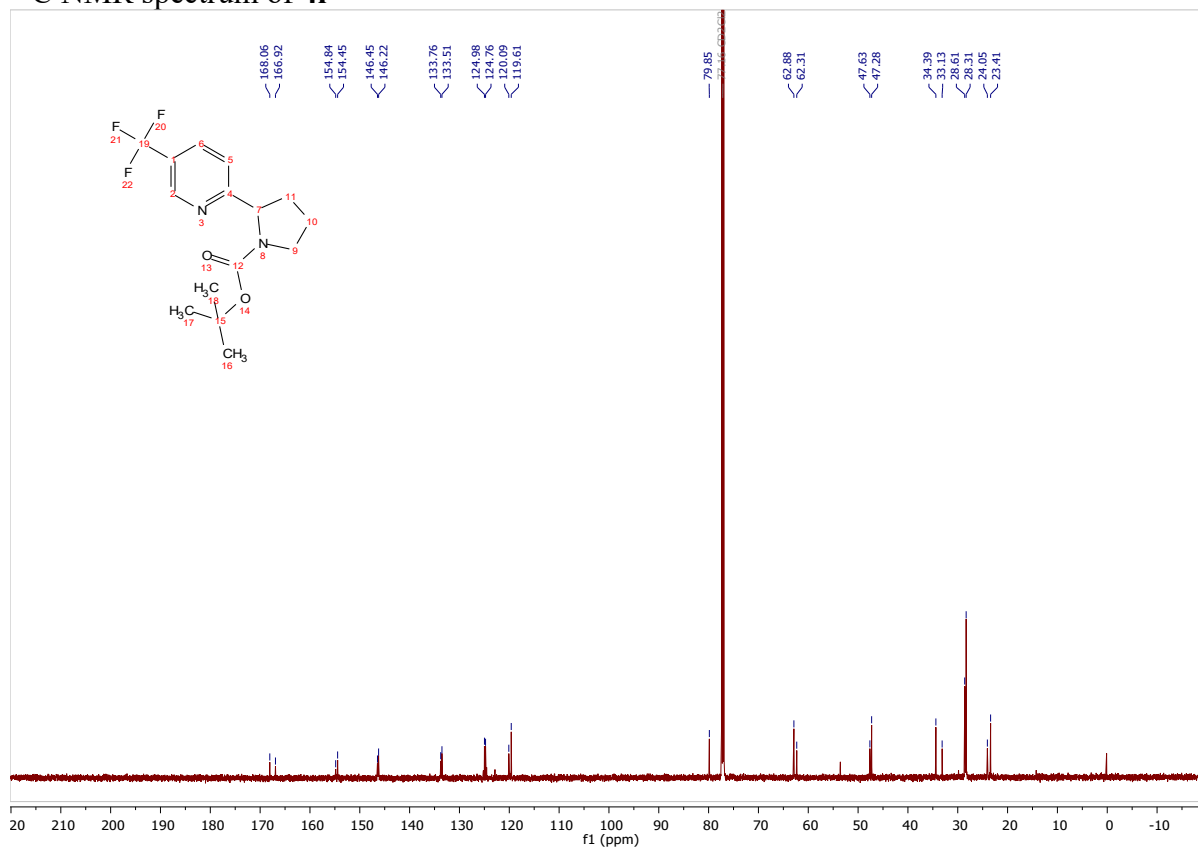

### <sup>19</sup>F NMR spectrum of **4i**

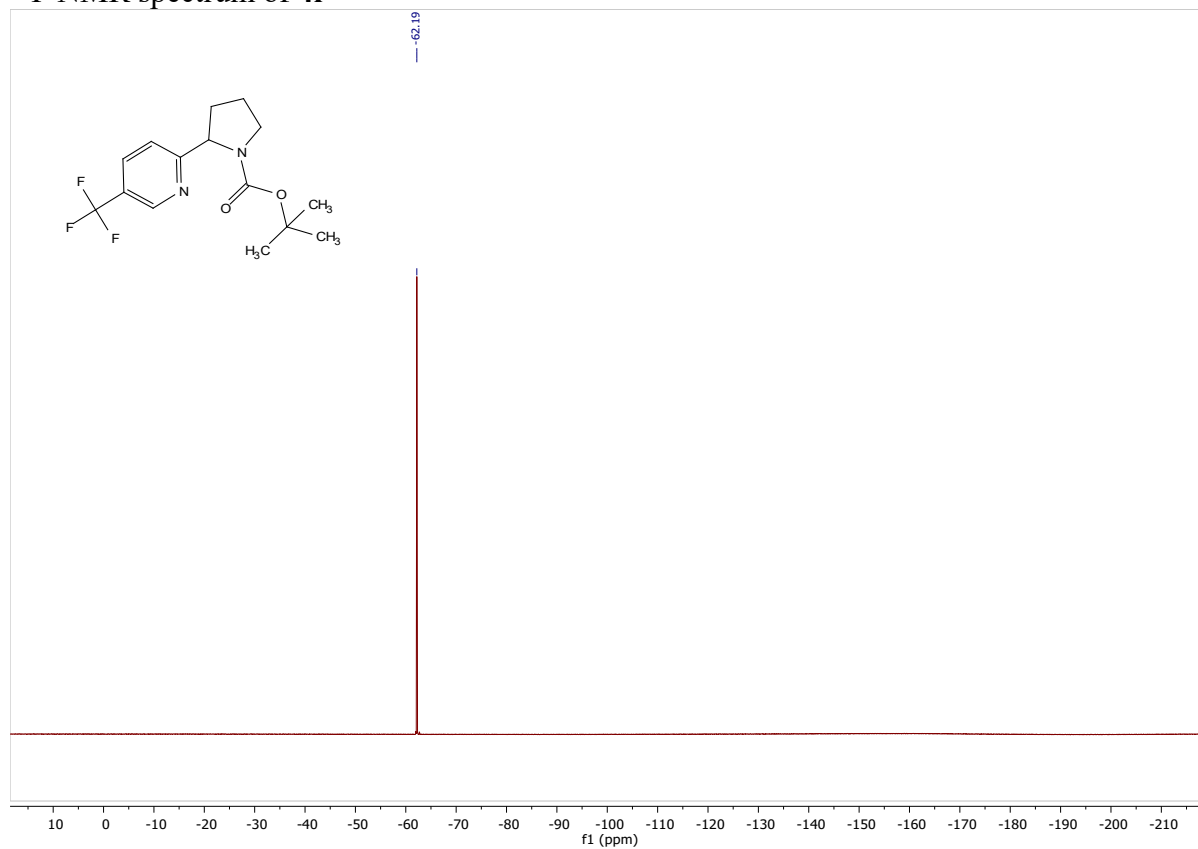

### <sup>1</sup>H NMR spectrum of **4k**

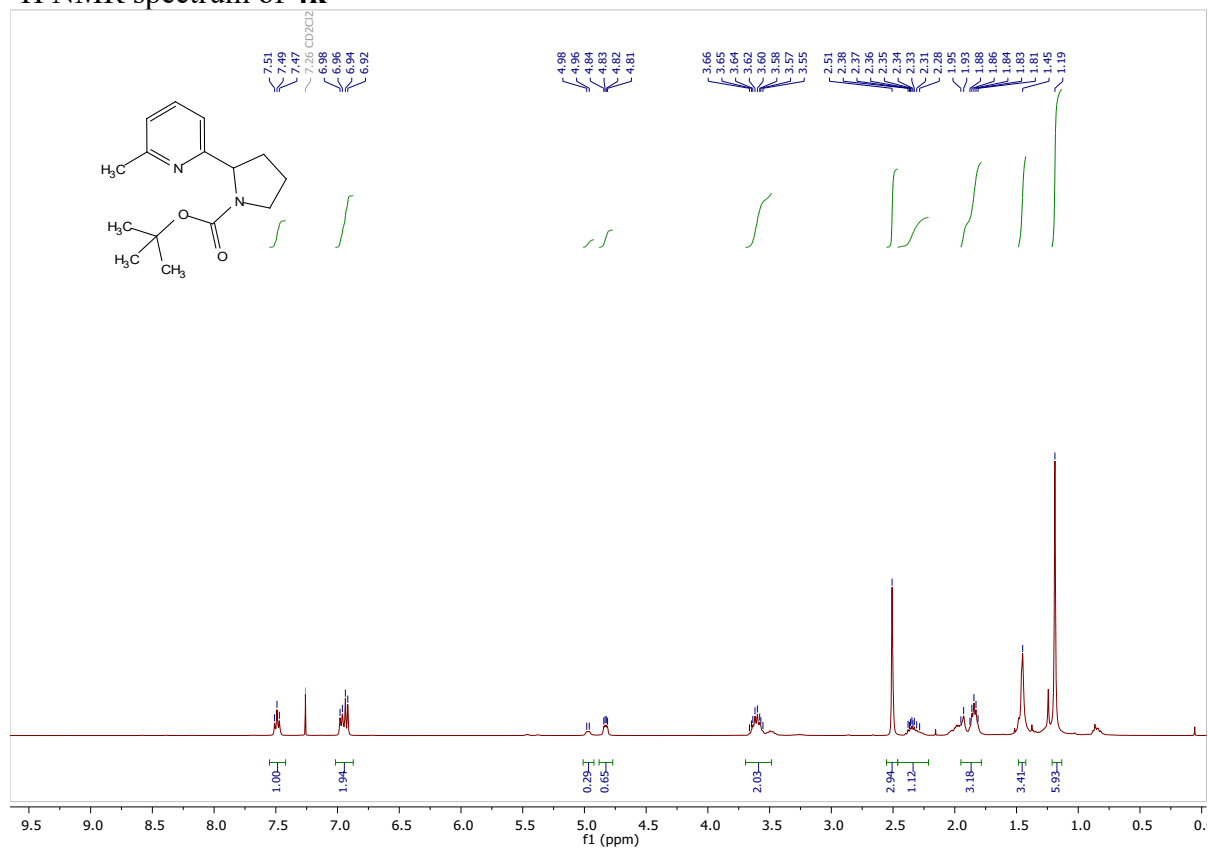

### <sup>13</sup>C NMR spectrum of **4k**

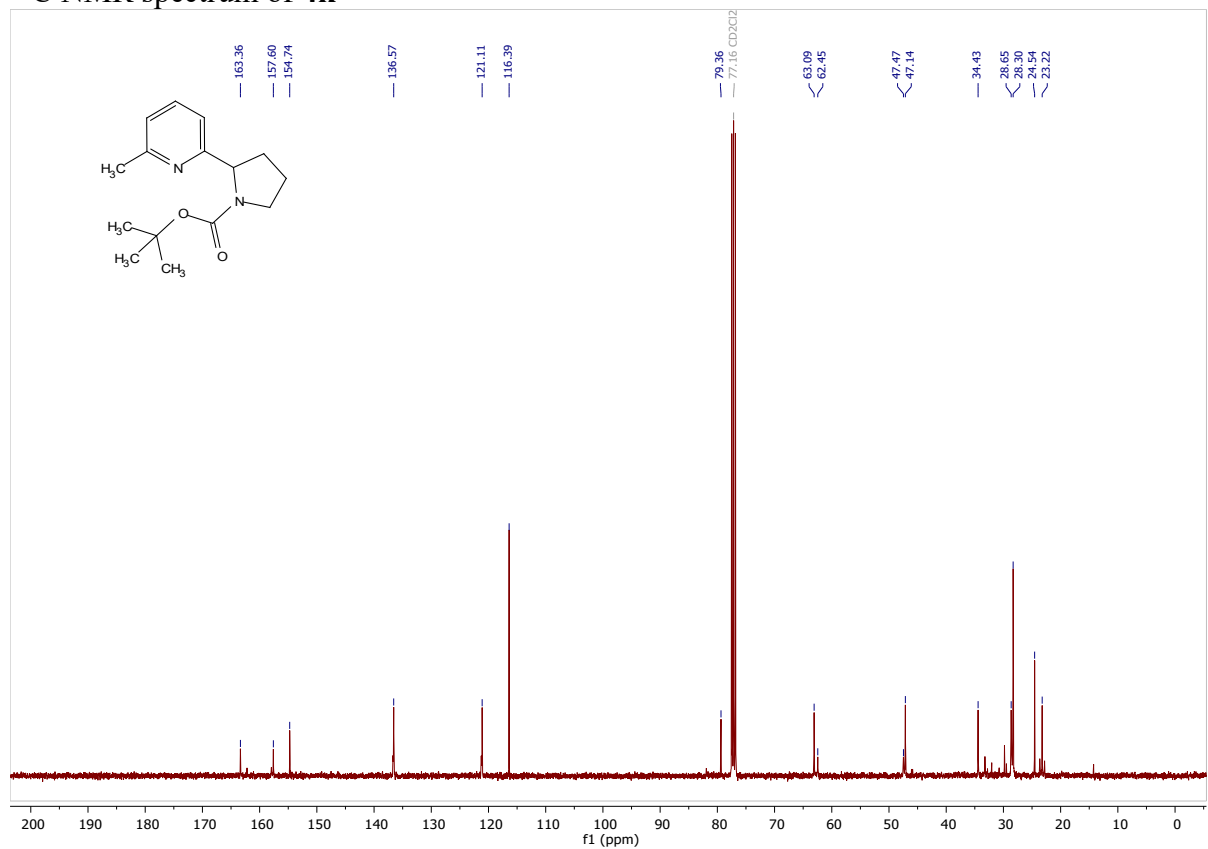

# <sup>1</sup>H NMR spectrum of **41**

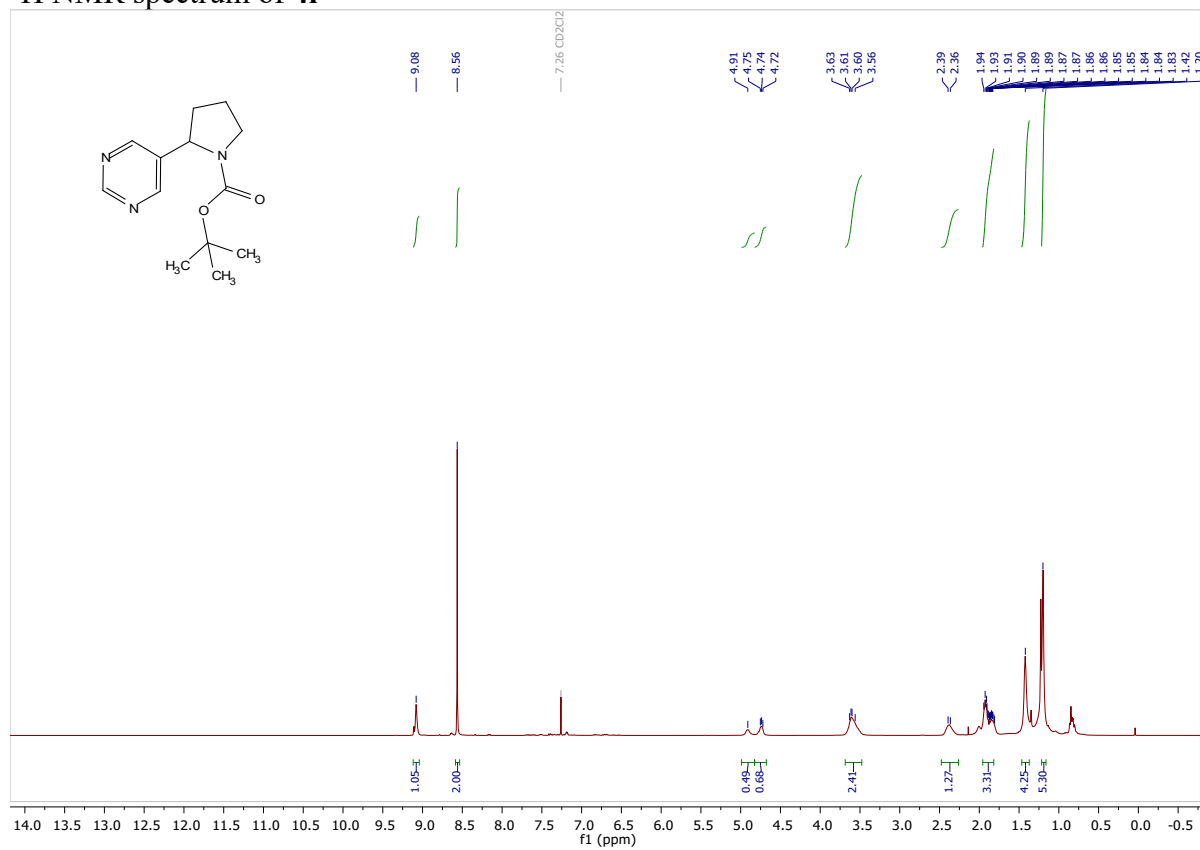

# <sup>13</sup>C NMR spectrum of **41**

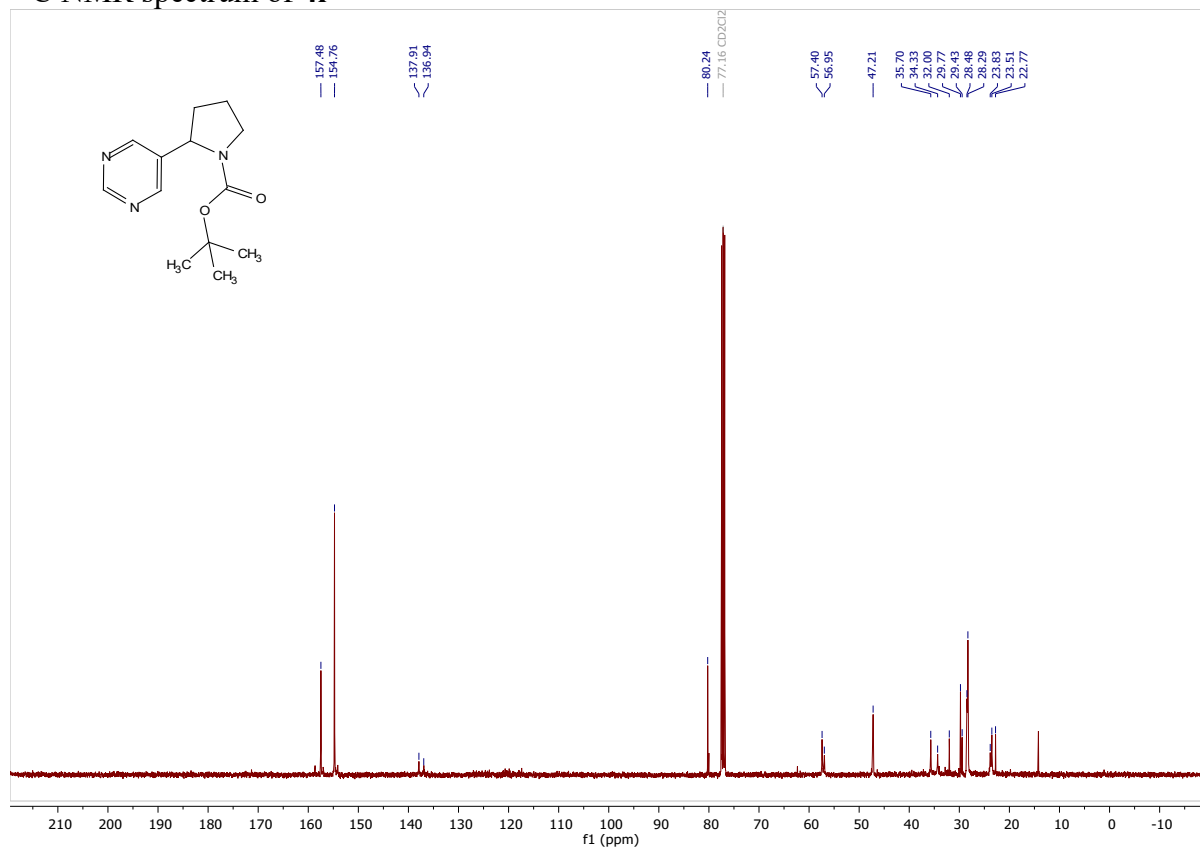

<sup>1</sup>H NMR spectrum of **4m**

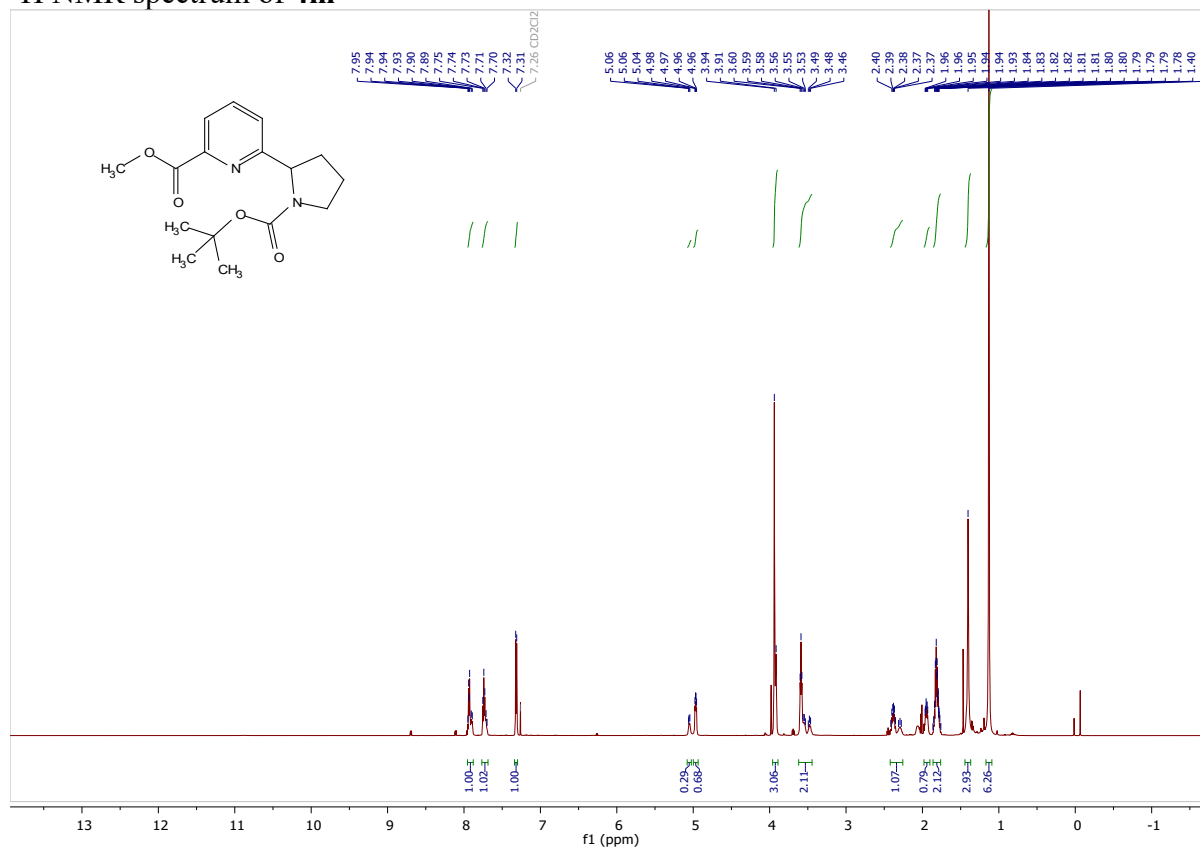

<sup>13</sup>C NMR spectrum of **4m**

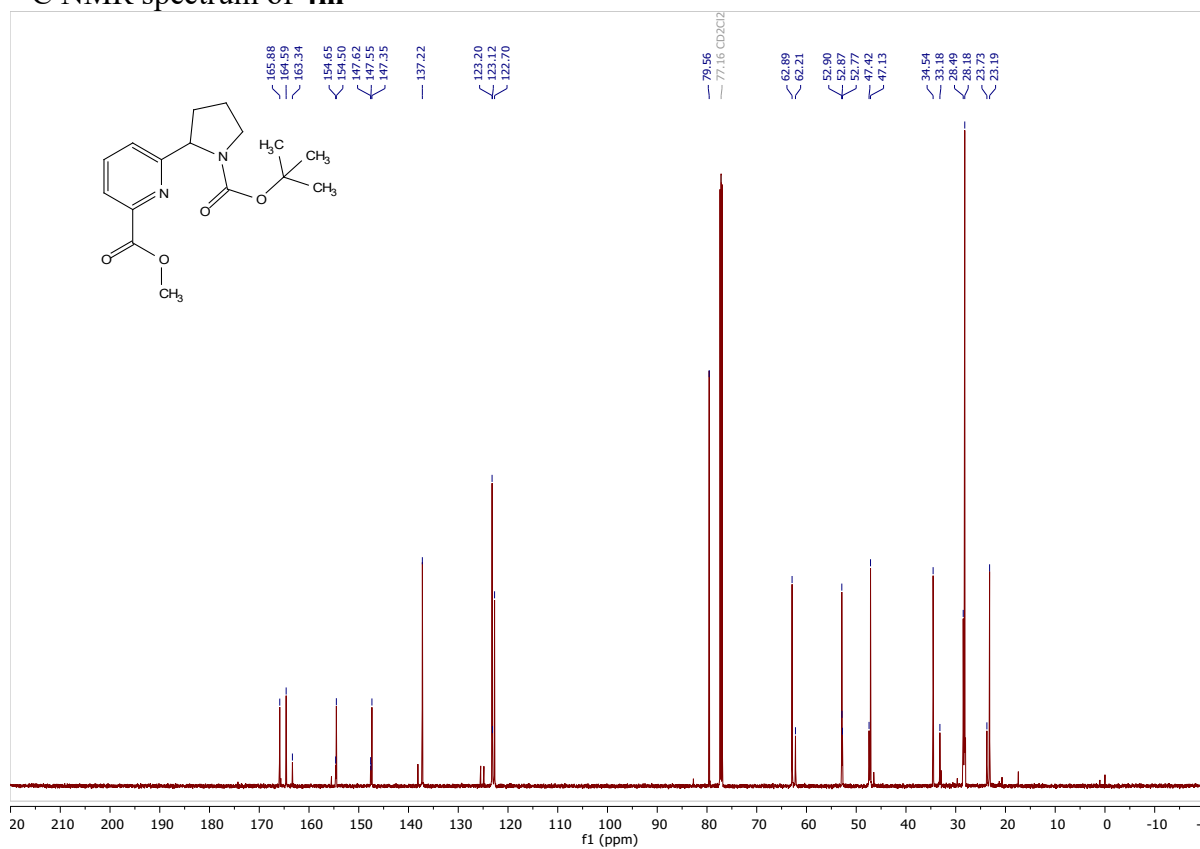

<sup>1</sup>H NMR spectrum of **4n**

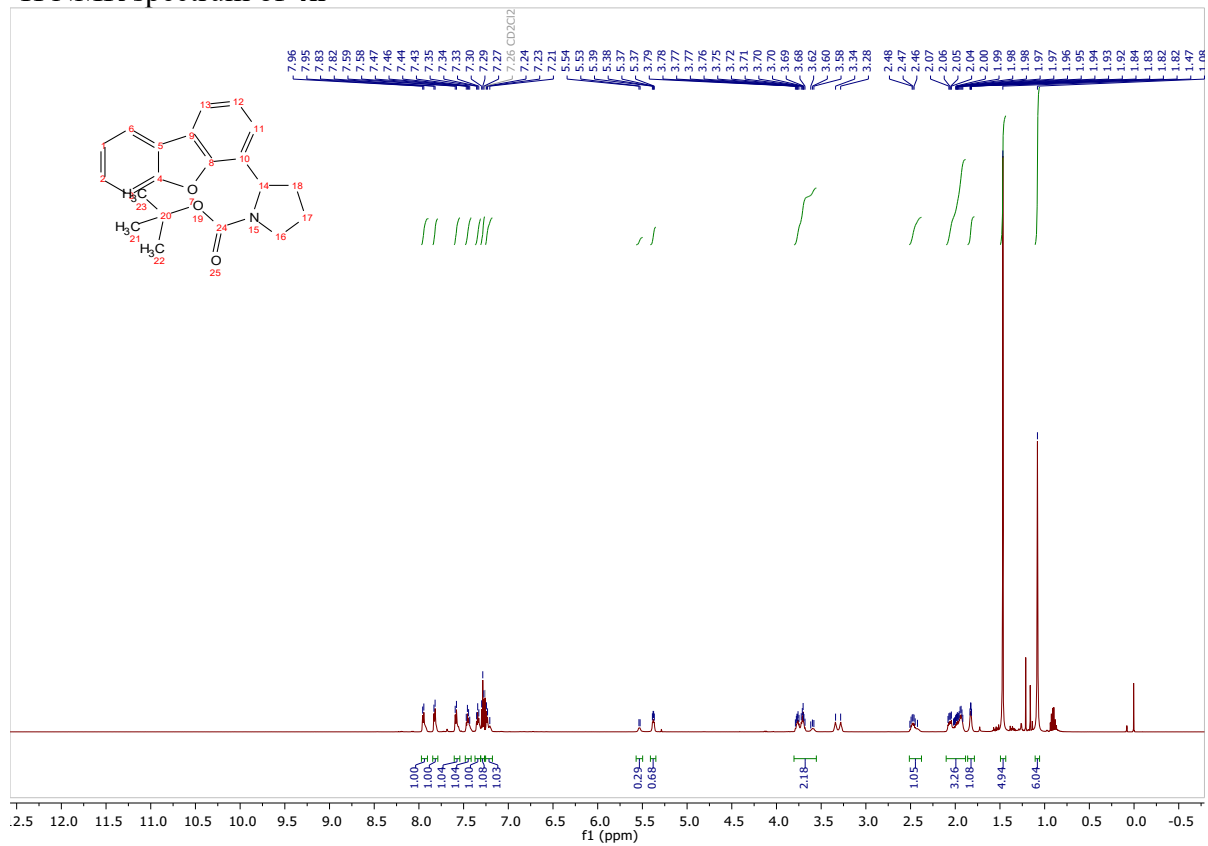

<sup>13</sup>C NMR spectrum of **4n**

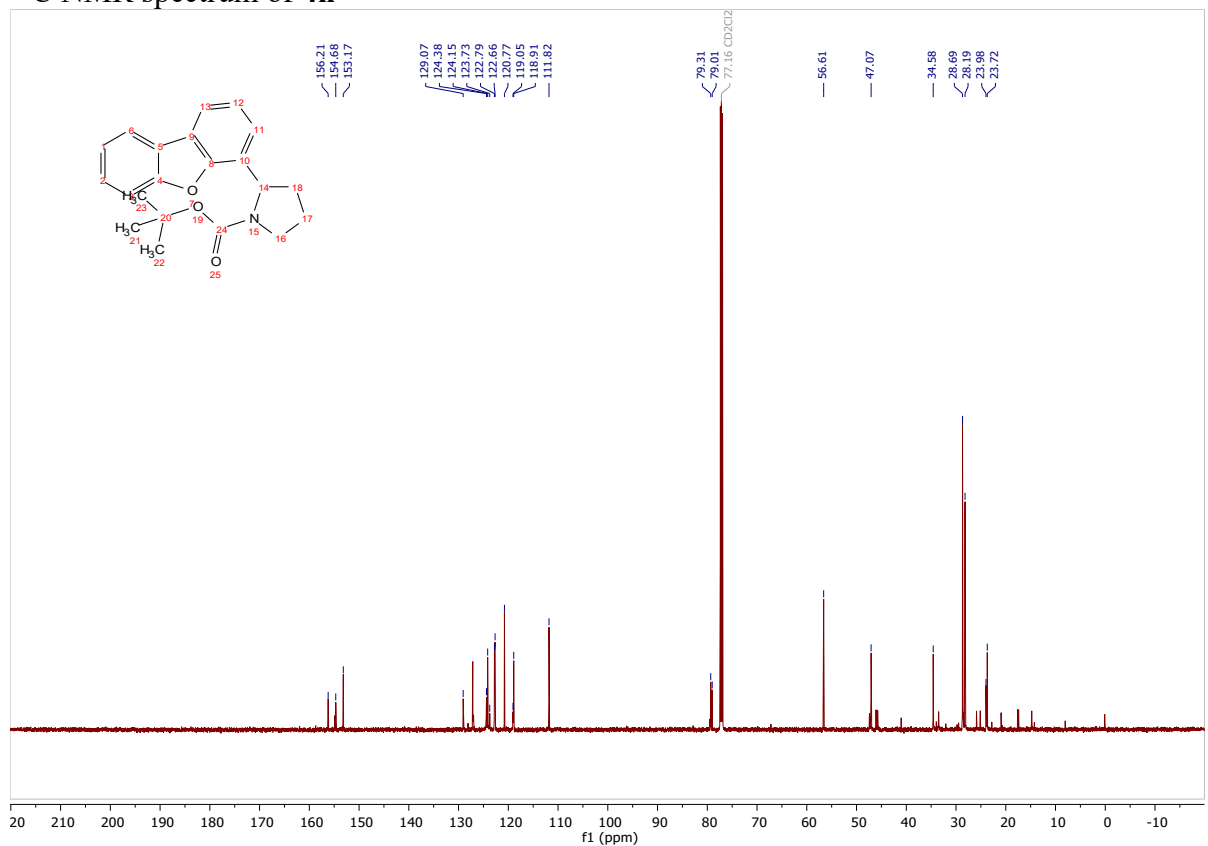



# <sup>1</sup>H NMR spectrum of 4o

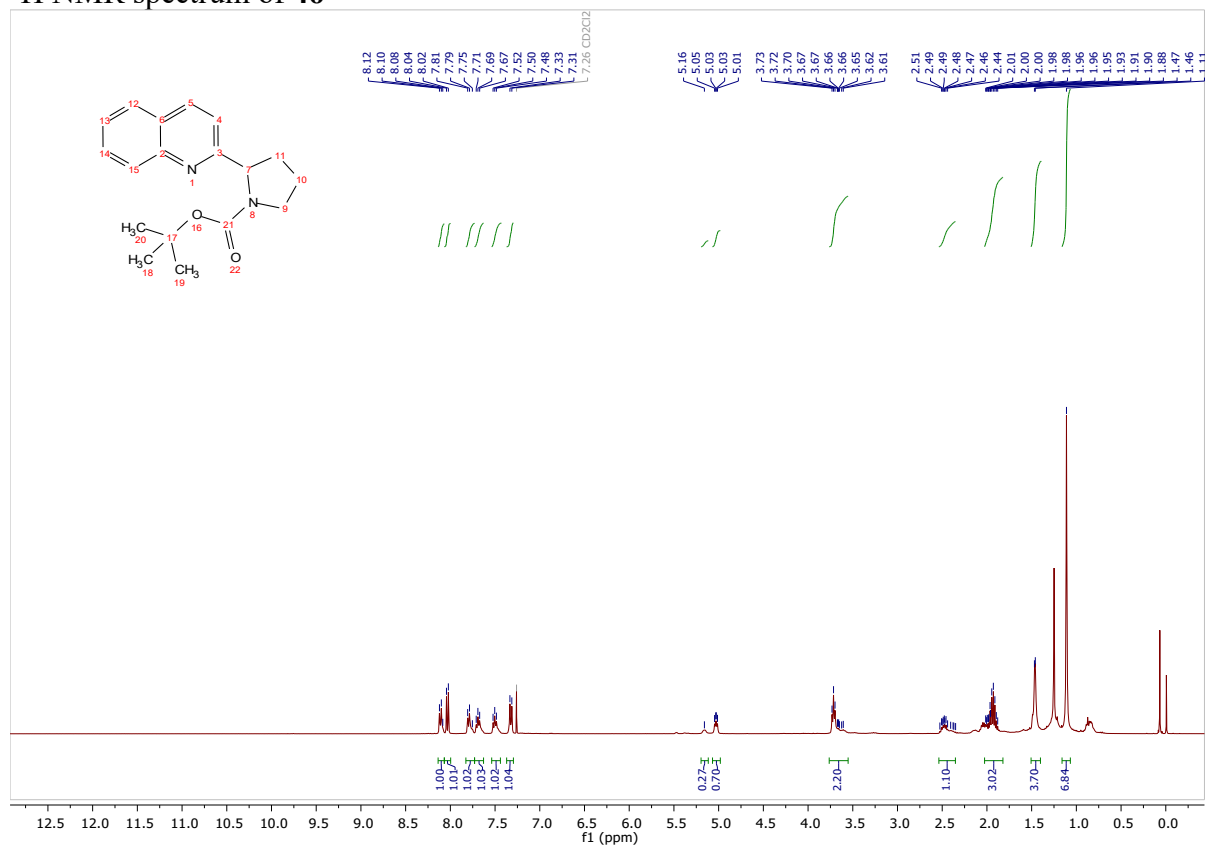

# <sup>13</sup>C NMR spectrum of 4o

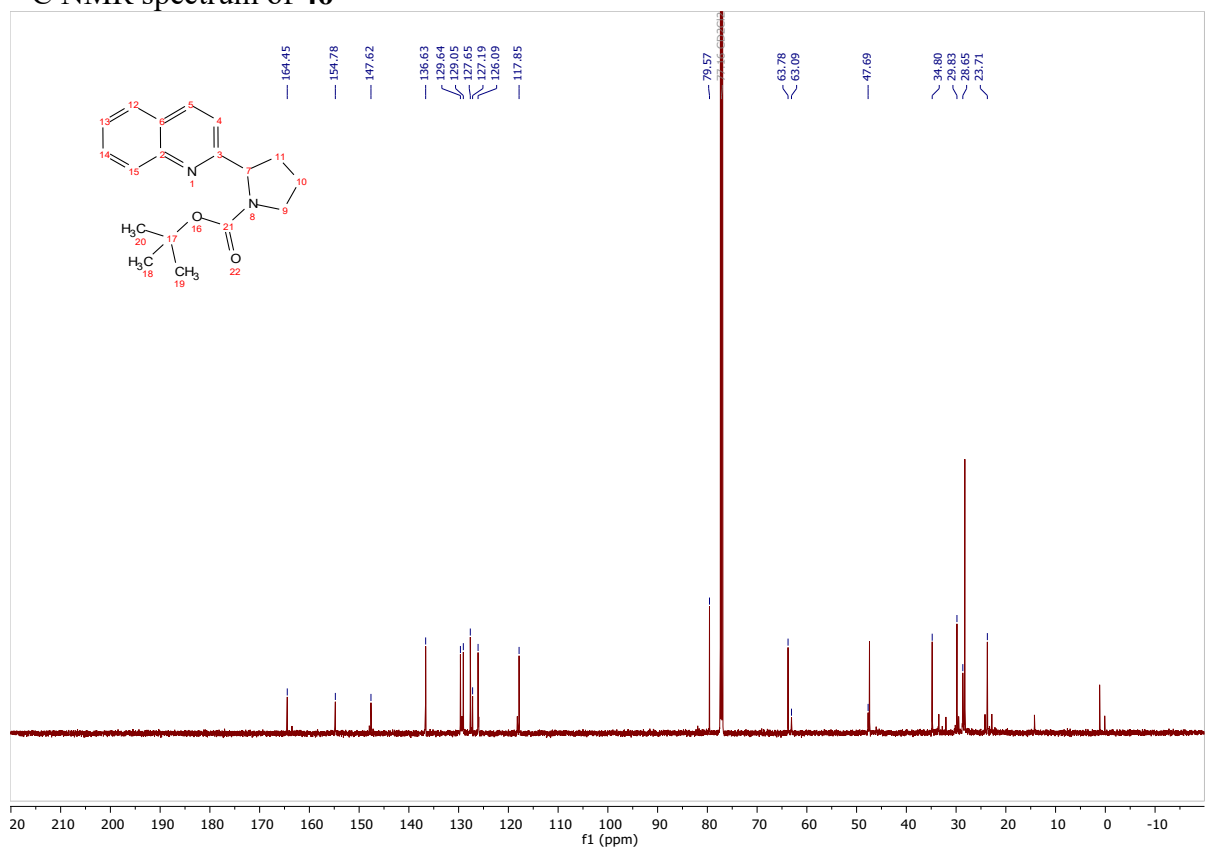

## 7. DFT calculations

### 7.1. General information

DFT calculations were performed using Gaussian 16.<sup>21</sup> Gas phase geometry optimizations were done using the B3LYP functional<sup>22</sup> with 6-31G(d)<sup>23</sup> as basis set. At this level of theory, all stationary points were characterized by frequency calculations. For all found maxima, only one imaginary frequency was obtained, and intrinsic reaction coordinate scans (IRC) were performed to verify the energy profiles connecting the transition structures to the correct associated local minima.

The gas-phase structures were reoptimized using B3LYP with added empirical dispersion (GD3BJ)<sup>24</sup> and implicit solvent description (IEFPCM) for 1,4-dioxane in combination with 6-311+G(d,p)<sup>25</sup> as basis set. The temperature for the final frequency calculations was set to 313 K to obtain the final free energy values.

All given values correspond to Gibbs Free ( $G$ ) energies at this level of theory and are given in kcal mol<sup>-1</sup>, unless stated otherwise. All relative free energies ( $\Delta G$ ) have been calculated in reference to separately computed, uncoordinated starting compounds (bromine radical, cyclopentylboronic acid).

## 7.2 Results

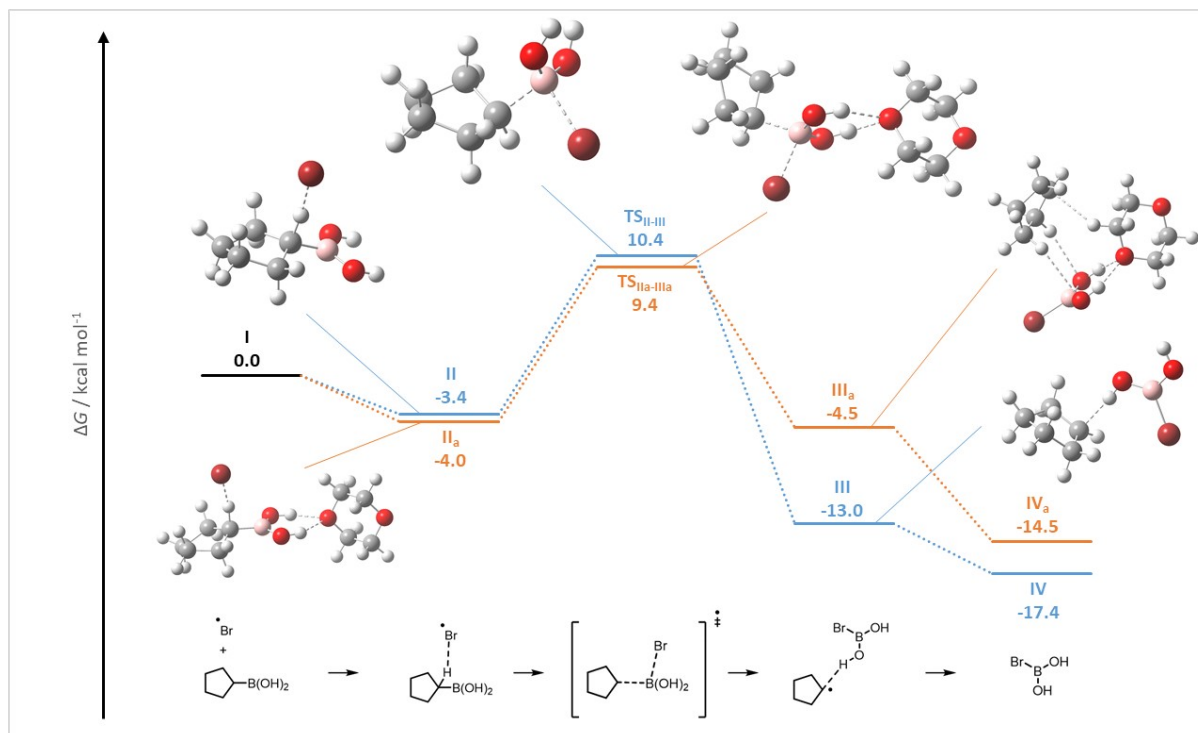

**Scheme S1:** Free energy diagram for the activation pathways for the boronic acid with (blue) and without (orange, index *a*) explicitly modelled solvent molecule taken into account.

For the activation of the boronic acids, using cyclopentylboronic acid as a prototype, several approaches were computationally explored. None of the attempts at ionic pathways involving a preformed complex of boronic acid and a bromide anion led to any feasible structures.

Complexes of boronic acid with either carbonate or an explicit solvent molecule have been investigated. All approaches involving a bromide anion in this context were unsuccessful.

Moreover, dissociation of these carbonate or dioxane complexes preceding the bromide approach has been examined but did not lead to any feasible transition structures, neither via radical nor ionic pathways, which is in agreement with the experimentally determined crucial need for the presence of bromide.

In contrast, feasible pathways were found for the involvement of a bromine radical. While the activation mechanism initiated by the reaction of a bromine radical with residual water was found at a high energy barrier ( $31.7 \text{ kcal mol}^{-1}$ ), the activation by a direct approach of a bromine radical to the starting boronic acid, both with and without an explicitly modelled dioxane molecule were found more promising. The energy diagram corresponding to that pathway is

depicted in Scheme S1 (indicated in blue: pathway with implicit solvent model only; indicated in orange and denoted with index *a*: pathway both with explicitly described dioxane molecule and implicit solvent model). In contrast to the bromine radical forming a boronate complex, the calculations suggest a favorable coordination towards one of the cyclopentyl hydrogens (intermediates **II** and **II<sub>a</sub>**). The activation barriers for the subsequent transition states **TS<sub>II-III</sub>** and **TS<sub>IIa-IIIa</sub>** were found to be reasonably low at 9.4 kcal mol<sup>-1</sup> and 10.4 kcal mol<sup>-1</sup>, respectively, to lead to bromoboronic acid **IV/IV<sub>a</sub>** via an overall clearly exothermic pathway.

The explicitly modelled solvent molecule was found to be coordinated to all boronic acid intermediates by H-bonding, but overall had only a very minor positive effect (about 1 kcal mol<sup>-1</sup>) on the energies in the pathway, and the relevant geometries were not altered significantly in comparison to the ones obtained for the implicit description in the implicit polarizable continuum model. The only exception from this was found to be the intermediary secondary radical complex **III<sub>a</sub>**, where the solvent substitutes the stabilizing interaction between the hydrogen of the boronic acid and the radical by H-bonding to the solvent oxygen. Expectedly, this destabilization renders the secondary radical more reactive towards the Ni catalyst system (which was not taken into account for the calculations performed in this work, as this was considered a well-established and commonly known process). As the explicit solvent model seemed not to significantly impact the interactions of interest to this work, it was omitted in the main text and in the discussion of the results in the following.

To complement the study on the boronic acid, the transition state was calculated for the activation step employing pinacol cyclopentyl boronate, where the TS was found at a significantly elevated energetic barrier of 48.7 kcal mol<sup>-1</sup>, which may to a large part be the result of a steric clash between the cyclopentyl ring and the pinacol moiety in the TS geometry needed to provide space for the bromine radical to approach. There are also some implications on an electronic level: As the analysis of the NBO charge distribution in the calculated TS shows, there are higher partial charges at the oxygens of the free boronic acid (-0.905 vs -0.801), which reflect also in a slightly higher partial charge the *ipso*-carbon atom (-0.347 vs. -0.351 for the pinacol boronate). Coordinating a dioxane molecule to the boronic acid has an enhancing effect in both regards (-0.924 and -0.332 for oxygens and carbon, respectively). Overall, these findings reflect the experimental results showing that the reaction works exclusively with boronic acids and not with their ester counterparts.

All found productive pathways for the activation of the cyclopentylboronic acid resulted in the formation of the bromoboronic acid intermediate **IV**. Several computational attempts to transform this intermediate into any more plausible reaction products were undertaken, such as elimination of HBr with and without base (both carbonate and hydroxide as generic base from residual water in the reaction media) to deliver borinic acid or the addition of hydroxide or carbonate to form an anionic compound prior to eliminating bromide. However, none of these investigations resulted in any useful transition structures or stable products.

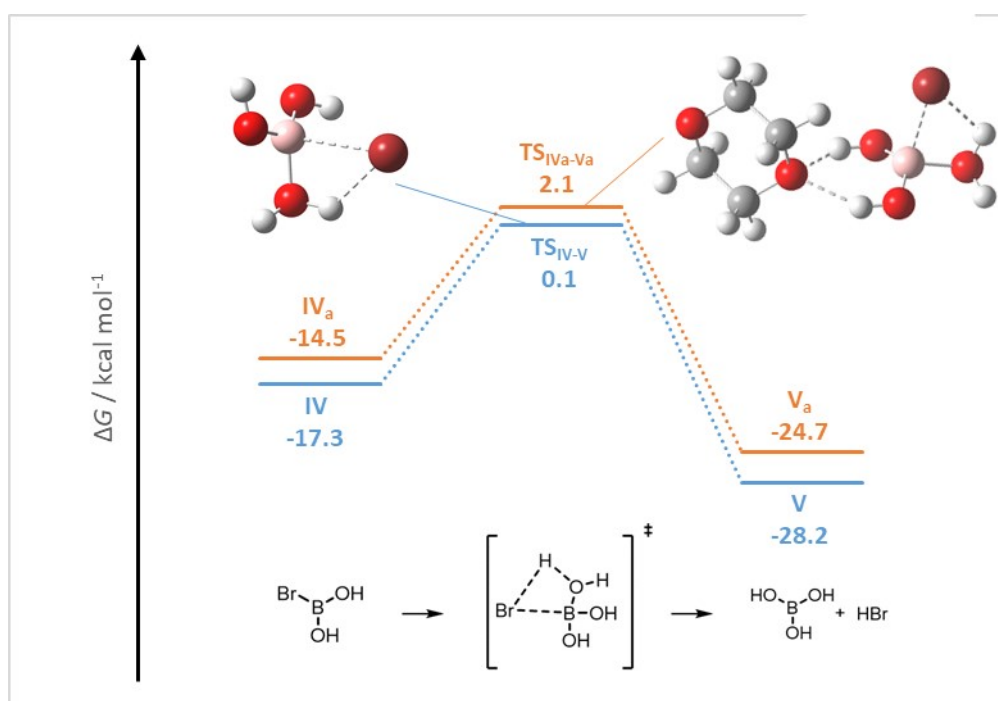

**Scheme S2:** Free energy diagram for the transformation of bromoboronic acid **IV** into boronic acid (**V**), with (blue) and without (orange, index *a*) explicitly modelled solvent molecule taken into account. Energies are relative to the uncoordinated, separately calculated starting materials (**I** in Scheme S1).

Finally, the addition of residual water was examined and resulted in a computationally feasible transition state in which the water molecule replaces the bromide and simultaneously transfers one of the protons to yield boronic acid and hydrogen bromide in one single step. The corresponding results are depicted in the energy diagram in Scheme 2. The relative barrier to the obtained **TS<sub>IV-V</sub>** was found to be surprisingly high ( $\Delta\Delta G(\text{IV}, \text{TS}_{\text{IV-V}}) = 17.4 \text{ kcal mol}^{-1}$ ) due

to the unexpected stability of the bromoboronic acid intermediate **IV** (-17.3 kcal mol<sup>-1</sup>), however, for a process at 40 °C, this is to be considered quite plausible. As mentioned before, the consideration of an explicitly modelled solvent molecule did not provide any significant effect in terms of energy (16.6 kcal mol<sup>-1</sup> activation barrier for **TS<sub>IVa-va</sub>**).

The resulting boronic acid (**V**) and hydrogen bromide were calculated to be at a significantly lower energy level than any other intermediate in the found pathway (-28.2 kcal mol<sup>-1</sup>) suggesting a strong overall driving force for entire pathway. The computationally suggested boronic acid as reaction byproduct could be experimentally proven by <sup>11</sup>B-NMR spectroscopy.

### 7.3 Energies and coordinates of calculated structures

#### Boronic acid

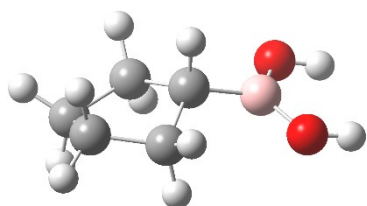

Method: IEFPCM(1,4-dioxane)-B3LYP-GD3BJ/6-311+G(d,p)

Electronic Energy (EE) = -372.71495 Hartree

Zero-point Energy Correction = 0.164182 Hartree

Thermal Correction to Energy = 0.173448 Hartree

Thermal Correction to Enthalpy = 0.174439 Hartree

Thermal Correction to Free Energy = 0.127509 Hartree

EE + Zero-point Energy = -372.55077 Hartree

EE + Thermal Energy Correction = -372.5415 Hartree

EE + Thermal Enthalpy Correction = -372.54051 Hartree

EE + Thermal Free Energy Correction = -372.58744 Hartree

|   |             |             |             |
|---|-------------|-------------|-------------|
| B | 1.55212300  | -0.01596300 | 0.06694500  |
| O | 2.22903700  | 1.18098800  | 0.03683700  |
| H | 3.16476500  | 1.12854500  | -0.18291300 |
| O | 2.15820100  | -1.21741700 | -0.21563300 |
| H | 3.09635400  | -1.17338000 | -0.42735900 |
| C | 0.03223600  | -0.00854900 | 0.46173000  |
| C | -0.77813200 | 1.24792000  | 0.01378700  |
| C | -0.80632000 | -1.20997200 | -0.02603700 |
| H | 0.01273700  | -0.03415900 | 1.56233600  |
| C | -2.19596300 | 0.73367000  | -0.36141700 |
| H | -0.30723200 | 1.74092900  | -0.83945700 |
| H | -0.81596400 | 1.98903900  | 0.81467800  |
| C | -2.25142500 | -0.72338900 | 0.13330800  |
| H | -0.59079100 | -2.12580500 | 0.52834300  |
| H | -0.59790200 | -1.41533300 | -1.08247600 |
| H | -2.99081500 | 1.35114200  | 0.06346200  |
| H | -2.32334000 | 0.75339200  | -1.44817200 |
| H | -2.53073700 | -0.75153000 | 1.19294500  |
| H | -2.97797000 | -1.32968700 | -0.41397400 |

#### Bromine radical

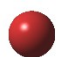

Method: IEFPCM(1,4-dioxane)-UB3LYP-GD3BJ/6-311+G(d,p)

Electronic Energy (EE) = -2574.1064 Hartree  
Zero-point Energy Correction = 0 Hartree  
Thermal Correction to Energy = 0.001487 Hartree  
Thermal Correction to Enthalpy = 0.002478 Hartree  
Thermal Correction to Free Energy = -0.017789 Hartree  
EE + Zero-point Energy = -2574.1064 Hartree  
EE + Thermal Energy Correction = -2574.1049 Hartree  
EE + Thermal Enthalpy Correction = -2574.1039 Hartree  
EE + Thermal Free Energy Correction = -2574.1241 Hartree

Br            0.00000000   0.00000000   0.00000000

### 1,4-Dioxane

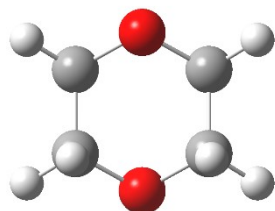

Method: IEFPCM(1,4-dioxane)-B3LYP-GD3BJ/6-311+G(d,p)

Electronic Energy (EE) = -307.77226 Hartree  
Zero-point Energy Correction = 0.121997 Hartree  
Thermal Correction to Energy = 0.12769 Hartree  
Thermal Correction to Enthalpy = 0.128681 Hartree  
Thermal Correction to Free Energy = 0.091866 Hartree  
EE + Zero-point Energy = -307.65026 Hartree  
EE + Thermal Energy Correction = -307.64457 Hartree  
EE + Thermal Enthalpy Correction = -307.64358 Hartree  
EE + Thermal Free Energy Correction = -307.68039 Hartree

|   |             |             |             |
|---|-------------|-------------|-------------|
| C | 1.17446400  | -0.73535600 | 0.19410200  |
| C | -1.17446500 | -0.73535800 | 0.19409700  |
| C | -1.17445900 | 0.73535900  | -0.19410300 |
| C | 1.17445700  | 0.73536000  | -0.19410900 |
| H | -2.02740100 | -1.25492300 | -0.24594300 |
| H | 1.22305000  | -0.83150000 | 1.28806100  |
| H | 2.02741500  | -1.25491500 | -0.24591800 |
| H | -1.22303900 | 0.83152400  | -1.28806100 |
| H | -2.02739800 | 1.25493000  | 0.24592200  |
| H | 1.22301900  | 0.83150600  | -1.28806800 |
| H | 2.02740700  | 1.25493200  | 0.24589600  |
| H | -1.22306600 | -0.83152300 | 1.28805400  |



|   |            |             |             |
|---|------------|-------------|-------------|
| O | 0.00000100 | 1.38475700  | 0.29226800  |
| O | 0.00000300 | -1.38476500 | -0.29225100 |

## II

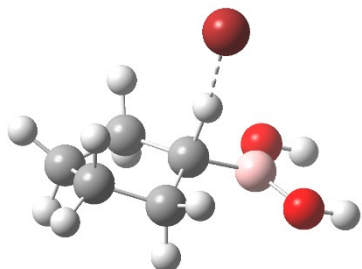

Method: IEFPCM(1,4-dioxane)-UB3LYP-GD3BJ/6-311+G(d,p)

Electronic Energy (EE) = -2946.836 Hartree  
 Zero-point Energy Correction = 0.160923 Hartree  
 Thermal Correction to Energy = 0.172503 Hartree  
 Thermal Correction to Enthalpy = 0.173494 Hartree  
 Thermal Correction to Free Energy = 0.118901 Hartree  
 EE + Zero-point Energy = -2946.675 Hartree  
 EE + Thermal Energy Correction = -2946.6634 Hartree  
 EE + Thermal Enthalpy Correction = -2946.6625 Hartree  
 EE + Thermal Free Energy Correction = -2946.7171 Hartree

|    |             |             |             |
|----|-------------|-------------|-------------|
| B  | 1.19069300  | 1.58284100  | 0.03641800  |
| O  | 1.41901100  | 2.20326700  | -1.15982300 |
| H  | 1.56858000  | 3.15377400  | -1.12415600 |
| O  | 1.18890900  | 2.20428800  | 1.25360500  |
| H  | 1.33408700  | 3.15603100  | 1.24632900  |
| C  | 0.88683300  | 0.03412500  | 0.01111800  |
| C  | 1.28824100  | -0.80957500 | -1.20667900 |
| C  | 1.16357800  | -0.81243500 | 1.24904300  |
| H  | -0.31033400 | 0.12383400  | -0.03208000 |
| C  | 1.64070500  | -2.21282500 | -0.65270000 |
| H  | 2.12793500  | -0.34699700 | -1.73296600 |
| H  | 0.47066600  | -0.85402400 | -1.93050500 |
| C  | 1.01573200  | -2.25640000 | 0.75274400  |
| H  | 0.52277200  | -0.55479600 | 2.09334900  |
| H  | 2.20009300  | -0.62951300 | 1.56763200  |
| H  | 1.28491800  | -3.01681600 | -1.29926000 |
| H  | 2.72736900  | -2.31602700 | -0.57302900 |
| H  | -0.04739000 | -2.50940300 | 0.68872400  |
| H  | 1.49340000  | -2.98631600 | 1.40946200  |
| Br | -2.17598500 | -0.00147800 | -0.06191400 |

**$\Pi_a$**

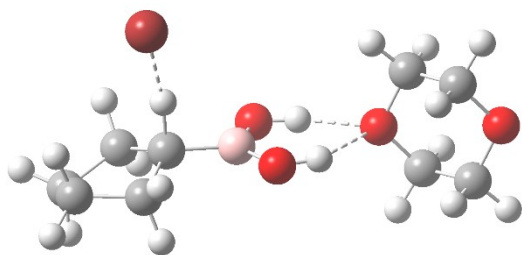

Method: IEFPCM(1,4-dioxane)-UB3LYP-GD3BJ/6-311+G(d,p)

Electronic Energy (EE) = -3254.6281 Hartree  
Zero-point Energy Correction = 0.285292 Hartree  
Thermal Correction to Energy = 0.304302 Hartree  
Thermal Correction to Enthalpy = 0.305293 Hartree  
Thermal Correction to Free Energy = 0.229708 Hartree  
EE + Zero-point Energy = -3254.3428 Hartree  
EE + Thermal Energy Correction = -3254.3238 Hartree  
EE + Thermal Enthalpy Correction = -3254.3228 Hartree  
EE + Thermal Free Energy Correction = -3254.3984 Hartree

|    |             |             |             |
|----|-------------|-------------|-------------|
| B  | 0.24847100  | -0.78068000 | 0.16935000  |
| O  | -0.27810100 | -0.85641500 | 1.42790700  |
| H  | -1.24347400 | -0.74044000 | 1.42253100  |
| O  | -0.51095500 | -0.60089000 | -0.95281300 |
| H  | -1.45286600 | -0.50144100 | -0.73296000 |
| C  | 1.81752100  | -0.87995000 | 0.00206900  |
| C  | 2.67796100  | -1.49264200 | 1.11363500  |
| C  | 2.41467400  | -1.33322400 | -1.32434100 |
| H  | 2.02303200  | 0.30874700  | 0.03955400  |
| C  | 3.86625000  | -2.18365800 | 0.39928300  |
| H  | 2.08737000  | -2.19087300 | 1.71365700  |
| H  | 3.01872800  | -0.71923100 | 1.80689600  |
| C  | 3.89832900  | -1.56350500 | -1.00852600 |
| H  | 2.22661400  | -0.63164200 | -2.13820300 |
| H  | 1.93982000  | -2.28390800 | -1.60809400 |
| H  | 4.80674900  | -2.05950500 | 0.93903600  |
| H  | 3.67555100  | -3.25868900 | 0.32077100  |
| H  | 4.41702400  | -0.59967400 | -0.98729500 |
| H  | 4.40061100  | -2.19688400 | -1.74273900 |
| Br | 2.60141900  | 2.07835600  | 0.02349100  |
| C  | -3.40149200 | 1.01805700  | 0.69431100  |

|   |             |             |             |
|---|-------------|-------------|-------------|
| C | -4.35657800 | 1.36462700  | -0.43429600 |
| C | -4.92771500 | -0.89999900 | -0.68005900 |
| C | -3.98116700 | -1.27799200 | 0.44633800  |
| H | -4.80541300 | 2.34465000  | -0.26815100 |
| H | -3.90825400 | 1.08411000  | 1.66345100  |
| H | -2.53026500 | 1.67383800  | 0.69544400  |
| H | -5.79129100 | -1.56615200 | -0.69477200 |
| H | -4.40661800 | -0.97085300 | -1.64514600 |
| H | -4.50967400 | -1.29176700 | 1.40613800  |
| H | -3.52242300 | -2.25199800 | 0.27159600  |
| H | -3.81650400 | 1.37838500  | -1.39113800 |
| O | -2.90373600 | -0.32483800 | 0.52226500  |
| O | -5.42563700 | 0.42264200  | -0.49610600 |

### TS<sub>II-III</sub>

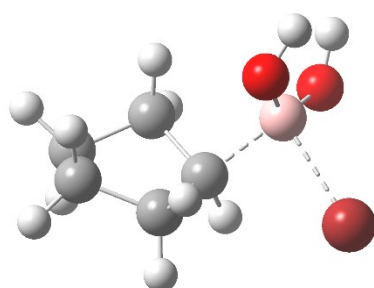

Method: IEFPCM(1,4-dioxane)-UB3LYP-GD3BJ/6-311+G(d,p)

Electronic Energy (EE) = -2946.8167 Hartree

Zero-point Energy Correction = 0.161953 Hartree

Thermal Correction to Energy = 0.173376 Hartree

Thermal Correction to Enthalpy = 0.174367 Hartree

Thermal Correction to Free Energy = 0.12177 Hartree

EE + Zero-point Energy = -2946.6548 Hartree

EE + Thermal Energy Correction = -2946.6434 Hartree

EE + Thermal Enthalpy Correction = -2946.6424 Hartree

EE + Thermal Free Energy Correction = -2946.695 Hartree

|   |             |             |             |
|---|-------------|-------------|-------------|
| B | 0.40856200  | 0.97904600  | 0.24679500  |
| O | 0.18628800  | 1.06294300  | 1.60513600  |
| H | 0.54798800  | 1.84295700  | 2.03626200  |
| O | 0.74499800  | 2.04684600  | -0.56045300 |
| H | 0.77315900  | 2.90171200  | -0.11944600 |
| C | -0.80985500 | -0.05072600 | -0.52286900 |
| C | -1.24039200 | -1.28000800 | 0.29347400  |
| C | -2.02023500 | 0.91558400  | -0.58303600 |
| H | -0.45823200 | -0.29602100 | -1.51997200 |
| C | -2.75179100 | -1.08336600 | 0.55682200  |
| H | -0.68050400 | -1.37058100 | 1.22352900  |
| H | -1.04310100 | -2.18605500 | -0.28453400 |

|    |             |             |             |
|----|-------------|-------------|-------------|
| C  | -3.20151200 | -0.06921700 | -0.50719700 |
| H  | -1.99211000 | 1.52922800  | -1.48309000 |
| H  | -2.05709800 | 1.57812000  | 0.28469800  |
| H  | -3.30789100 | -2.02157800 | 0.51084700  |
| H  | -2.90436200 | -0.65887400 | 1.55327100  |
| H  | -3.33593400 | -0.56450600 | -1.47414000 |
| H  | -4.13629800 | 0.43844900  | -0.25536100 |
| Br | 1.97840000  | -0.61600000 | -0.15676200 |

### TS<sub>IIa-IIIa</sub>

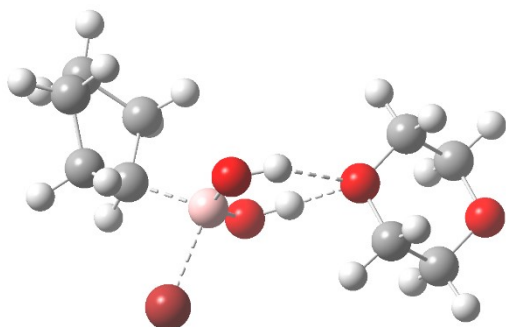

Method: IEFPCM(1,4-dioxane)-UB3LYP-GD3BJ/6-311+G(d,p)

Electronic Energy (EE) = -3254.609 Hartree

Zero-point Energy Correction = 0.286655 Hartree

Thermal Correction to Energy = 0.305287 Hartree

Thermal Correction to Enthalpy = 0.306279 Hartree

Thermal Correction to Free Energy = 0.232061 Hartree

EE + Zero-point Energy = -3254.3224 Hartree

EE + Thermal Energy Correction = -3254.3037 Hartree

EE + Thermal Enthalpy Correction = -3254.3027 Hartree

EE + Thermal Free Energy Correction = -3254.377 Hartree

|   |             |             |             |
|---|-------------|-------------|-------------|
| B | -0.73922300 | -0.07595000 | -0.11865500 |
| O | -0.41736000 | 0.28538800  | 1.16880100  |
| H | 0.52183900  | 0.52288800  | 1.24323700  |
| O | 0.12859700  | 0.03856400  | -1.18005200 |
| H | 1.00946000  | 0.31763200  | -0.87813400 |
| C | -2.38333600 | 0.45801900  | -0.55829600 |
| C | -3.40933700 | 0.38233100  | 0.58257600  |
| C | -2.14201200 | 1.95377800  | -0.87206500 |
| H | -2.67228100 | -0.09742200 | -1.44459900 |
| C | -3.81044000 | 1.84671300  | 0.86608600  |
| H | -3.00605700 | -0.10613400 | 1.46864400  |
| H | -4.26647300 | -0.21290500 | 0.25576900  |
| C | -3.47405900 | 2.59161200  | -0.43493400 |
| H | -1.88539700 | 2.10174600  | -1.92101800 |
| H | -1.33648200 | 2.37210400  | -0.26425700 |

|    |             |             |             |
|----|-------------|-------------|-------------|
| H  | -4.85862400 | 1.94435300  | 1.15556900  |
| H  | -3.20352700 | 2.24685300  | 1.68371500  |
| H  | -4.24417200 | 2.40372400  | -1.19024300 |
| H  | -3.38501400 | 3.67356500  | -0.30674800 |
| Br | -1.46421600 | -2.25088200 | -0.09198400 |
| C  | 3.00586800  | -0.70316000 | 0.76610100  |
| C  | 4.11336800  | -0.89182600 | -0.25515300 |
| C  | 4.32502100  | 1.43500400  | -0.49371700 |
| C  | 3.22069700  | 1.65657700  | 0.52587800  |
| H  | 4.69888300  | -1.78239200 | -0.02386800 |
| H  | 3.41568800  | -0.67942000 | 1.78181800  |
| H  | 2.25768500  | -1.49335700 | 0.69491000  |
| H  | 5.06373000  | 2.23574700  | -0.43861000 |
| H  | 3.89876400  | 1.41277000  | -1.50659200 |
| H  | 3.64142500  | 1.76380200  | 1.53209900  |
| H  | 2.62813400  | 2.54019200  | 0.28547600  |
| H  | 3.68240100  | -1.00080500 | -1.25982800 |
| O  | 2.31392400  | 0.53889800  | 0.51720100  |
| O  | 5.01347500  | 0.21507400  | -0.23263600 |

### III

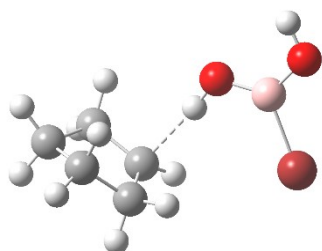

Method: IEFPCM(1,4-dioxane)-UB3LYP-GD3BJ/6-311+G(d,p)

Electronic Energy (EE) = -2946.8478 Hartree

Zero-point Energy Correction = 0.160974 Hartree

Thermal Correction to Energy = 0.173385 Hartree

Thermal Correction to Enthalpy = 0.174376 Hartree

Thermal Correction to Free Energy = 0.115517 Hartree

EE + Zero-point Energy = -2946.6868 Hartree

EE + Thermal Energy Correction = -2946.6744 Hartree

EE + Thermal Enthalpy Correction = -2946.6734 Hartree

EE + Thermal Free Energy Correction = -2946.7323 Hartree

|   |             |             |             |
|---|-------------|-------------|-------------|
| B | -1.59207500 | 1.06124100  | -0.06346000 |
| O | -0.34206000 | 1.50041300  | 0.18459600  |
| H | 0.30769200  | 0.81110800  | 0.43251300  |
| O | -2.59660500 | 1.89437800  | -0.41815400 |
| H | -2.31182500 | 2.81539600  | -0.46739200 |
| C | 1.79077200  | -0.49885000 | 0.83381700  |
| C | 1.93863100  | -1.09440700 | -0.53381400 |

|    |             |             |             |
|----|-------------|-------------|-------------|
| C  | 2.89263400  | 0.48362400  | 1.11578400  |
| H  | 1.17395200  | -0.94160500 | 1.60827900  |
| C  | 2.89950900  | -0.12195200 | -1.24723600 |
| H  | 0.98674000  | -1.23813000 | -1.05426000 |
| H  | 2.39531500  | -2.09550000 | -0.46017400 |
| C  | 3.82133100  | 0.37261300  | -0.11756500 |
| H  | 3.40801000  | 0.27386700  | 2.05988700  |
| H  | 2.50201600  | 1.50792800  | 1.21452900  |
| H  | 3.44581800  | -0.58840300 | -2.06907800 |
| H  | 2.33107400  | 0.71752100  | -1.66080200 |
| H  | 4.59597900  | -0.37596300 | 0.07675200  |
| H  | 4.32325100  | 1.31207000  | -0.35593600 |
| Br | -2.04987400 | -0.84311400 | 0.07301500  |

### IIIa

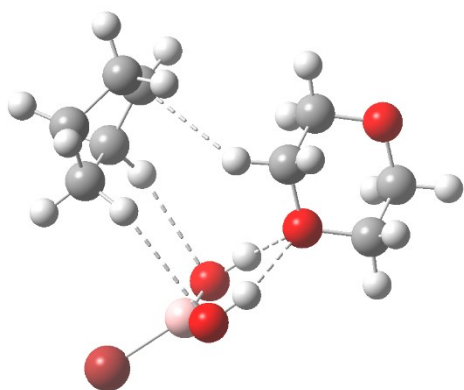

Method: IEFPCM(1,4-dioxane)-UB3LYP-GD3BJ/6-311+G(d,p)

Electronic Energy (EE) = -3254.6332 Hartree  
 Zero-point Energy Correction = 0.285237 Hartree  
 Thermal Correction to Energy = 0.30531 Hartree  
 Thermal Correction to Enthalpy = 0.306301 Hartree  
 Thermal Correction to Free Energy = 0.227625 Hartree  
 EE + Zero-point Energy = -3254.348 Hartree  
 EE + Thermal Energy Correction = -3254.3279 Hartree  
 EE + Thermal Enthalpy Correction = -3254.3269 Hartree  
 EE + Thermal Free Energy Correction = -3254.4056 Hartree

|   |             |             |             |
|---|-------------|-------------|-------------|
| B | -1.47466100 | -1.21495500 | 0.12790300  |
| O | -1.04900200 | -1.26600100 | 1.41279800  |
| H | -0.07798600 | -1.33697500 | 1.45498100  |
| O | -0.68086500 | -1.26716600 | -0.96845200 |
| H | 0.25773200  | -1.31316200 | -0.70710100 |
| C | 0.97805900  | 2.93265000  | -0.85056100 |
| C | -0.35378300 | 2.30905600  | -1.13314700 |
| C | 0.96463700  | 3.69873900  | 0.43753100  |
| H | 1.81521900  | 2.91687500  | -1.53766300 |

|    |             |             |             |
|----|-------------|-------------|-------------|
| C  | -1.10307700 | 2.43282900  | 0.21160000  |
| H  | -0.29271100 | 1.27787000  | -1.49548000 |
| H  | -0.89072900 | 2.86879800  | -1.91710400 |
| C  | -0.52932800 | 3.71645200  | 0.83828800  |
| H  | 1.39308800  | 4.70359700  | 0.34514600  |
| H  | 1.56321600  | 3.19368100  | 1.21467500  |
| H  | -2.18763100 | 2.45811600  | 0.09523900  |
| H  | -0.86811500 | 1.57454100  | 0.84977400  |
| H  | -1.01457900 | 4.59100900  | 0.39320900  |
| H  | -0.68121600 | 3.76896700  | 1.91829800  |
| Br | -3.39883700 | -1.03871000 | -0.17107900 |
| C  | 2.57250400  | -2.36145700 | 0.58565300  |
| C  | 3.57980700  | -2.17573300 | -0.53630400 |
| C  | 3.32463000  | 0.15553000  | -0.41587600 |
| C  | 2.31583400  | 0.00464900  | 0.70705800  |
| H  | 4.34213400  | -2.95482900 | -0.49723900 |
| H  | 3.07757900  | -2.39659900 | 1.55703600  |
| H  | 1.98570800  | -3.27044100 | 0.44881900  |
| H  | 3.90044500  | 1.07282900  | -0.29028300 |
| H  | 2.80317000  | 0.19473600  | -1.38193800 |
| H  | 2.81069000  | 0.04806700  | 1.68331200  |
| H  | 1.55012500  | 0.77677400  | 0.64882000  |
| H  | 3.07005800  | -2.22584400 | -1.50875500 |
| O  | 1.63628800  | -1.26442600 | 0.59005800  |
| O  | 4.25366800  | -0.92674200 | -0.40827300 |

### Secondary radical

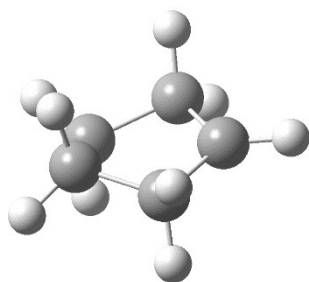

Method: IEFPCM(1,4-dioxane)-UB3LYP-GD3BJ/6-311+G(d,p)

Electronic Energy (EE) = -195.96783 Hartree

Zero-point Energy Correction = 0.125129 Hartree

Thermal Correction to Energy = 0.130833 Hartree

Thermal Correction to Enthalpy = 0.131824 Hartree

Thermal Correction to Free Energy = 0.094924 Hartree

EE + Zero-point Energy = -195.84271 Hartree

EE + Thermal Energy Correction = -195.837 Hartree

EE + Thermal Enthalpy Correction = -195.83601 Hartree

EE + Thermal Free Energy Correction = -195.87291 Hartree

|   |             |             |             |
|---|-------------|-------------|-------------|
| C | -0.00004000 | 1.27658100  | 0.00006400  |
| C | -1.23238200 | 0.43409500  | 0.12157700  |
| C | 1.23234600  | 0.43418200  | -0.12158000 |
| H | -0.00010700 | 2.35929600  | -0.00018800 |
| C | -0.73615900 | -0.98805200 | -0.22486000 |
| H | -2.05194200 | 0.76912100  | -0.52491300 |
| H | -1.63112800 | 0.45913000  | 1.14945200  |
| C | 0.73623600  | -0.98800200 | 0.22485300  |
| H | 2.05194100  | 0.76924000  | 0.52484900  |
| H | 1.63100100  | 0.45927000  | -1.14949100 |
| H | -1.32720300 | -1.77487000 | 0.24879300  |
| H | -0.79029500 | -1.13964600 | -1.30804700 |
| H | 0.79039300  | -1.13960100 | 1.30803800  |
| H | 1.32733300  | -1.77477100 | -0.24881400 |

#### IV

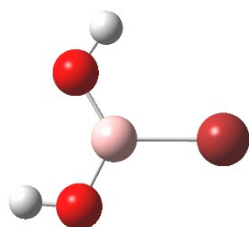

Method: IEFPCM(1,4-dioxane)-B3LYP-GD3BJ/6-311+G(d,p)

Electronic Energy (EE) = -2750.8704 Hartree  
 Zero-point Energy Correction = 0.034391 Hartree  
 Thermal Correction to Energy = 0.039308 Hartree  
 Thermal Correction to Enthalpy = 0.040299 Hartree  
 Thermal Correction to Free Energy = 0.00411 Hartree  
 EE + Zero-point Energy = -2750.836 Hartree  
 EE + Thermal Energy Correction = -2750.8311 Hartree  
 EE + Thermal Enthalpy Correction = -2750.8301 Hartree  
 EE + Thermal Free Energy Correction = -2750.8663 Hartree

|    |             |             |             |
|----|-------------|-------------|-------------|
| B  | -0.97070700 | -0.00282900 | 0.00000100  |
| O  | -1.65860000 | 1.16491100  | -0.00000400 |
| H  | -1.11193000 | 1.95680900  | 0.00003400  |
| O  | -1.59377900 | -1.19910900 | 0.00001000  |
| H  | -2.55613800 | -1.12258400 | -0.00006000 |
| Br | 0.98687500  | -0.01561400 | -0.00000100 |

#### IV<sub>a</sub>



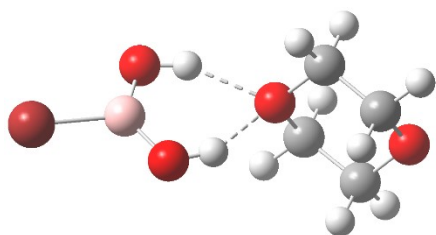

Method: IEFPCM(1,4-dioxane)-B3LYP-GD3BJ/6-311+G(d,p)

Electronic Energy (EE) = -3058.658 Hartree

Zero-point Energy Correction = 0.158914 Hartree

Thermal Correction to Energy = 0.171102 Hartree

Thermal Correction to Enthalpy = 0.172094 Hartree

Thermal Correction to Free Energy = 0.115851 Hartree

EE + Zero-point Energy = -3058.4991 Hartree

EE + Thermal Energy Correction = -3058.4869 Hartree

EE + Thermal Enthalpy Correction = -3058.4859 Hartree

EE + Thermal Free Energy Correction = -3058.5422 Hartree

|    |             |             |             |
|----|-------------|-------------|-------------|
| B  | -1.49714900 | -0.00056000 | -0.10176800 |
| O  | -1.05447900 | -0.00400000 | -1.38165400 |
| H  | -0.08044500 | -0.00420500 | -1.41291200 |
| O  | -0.71558700 | 0.00216500  | 1.00475500  |
| H  | 0.22766400  | 0.00136300  | 0.75799900  |
| Br | -3.43423600 | 0.00056300  | 0.17378400  |
| C  | 2.43861200  | 1.19008600  | -0.59836300 |
| C  | 2.43952700  | -1.19304700 | -0.59284400 |
| C  | 3.46970100  | -1.17269000 | 0.52278500  |
| C  | 3.46881000  | 1.17572800  | 0.51734700  |
| H  | 1.75821100  | -2.03852600 | -0.49202400 |
| H  | 2.92868500  | 1.22774500  | -1.57726400 |
| H  | 1.75662900  | 2.03549200  | -0.50152800 |
| H  | 2.96576200  | -1.21489900 | 1.49845700  |
| H  | 4.14312800  | -2.02620300 | 0.43631200  |
| H  | 2.96490600  | 1.22211800  | 1.49285600  |
| H  | 4.14159100  | 2.02933400  | 0.42684700  |
| H  | 2.92959400  | -1.23489900 | -1.57158200 |
| O  | 4.27367600  | 0.00164600  | 0.44386100  |
| O  | 1.62744100  | -0.00164900 | -0.53250100 |

**H<sub>2</sub>O**

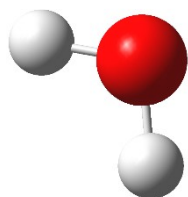

Method: IEFPCM(1,4-dioxane)-B3LYP-GD3BJ/6-311+G(d,p)

Electronic Energy (EE) = -76.462602 Hartree  
Zero-point Energy Correction = 0.021244 Hartree  
Thermal Correction to Energy = 0.024222 Hartree  
Thermal Correction to Enthalpy = 0.025213 Hartree  
Thermal Correction to Free Energy = 0.002526 Hartree  
EE + Zero-point Energy = -76.441358 Hartree  
EE + Thermal Energy Correction = -76.43838 Hartree  
EE + Thermal Enthalpy Correction = -76.437389 Hartree  
EE + Thermal Free Energy Correction = -76.460076 Hartree

|   |            |             |             |
|---|------------|-------------|-------------|
| O | 0.00000000 | 0.00000000  | 0.11741500  |
| H | 0.00000000 | -0.76310000 | -0.46965900 |
| H | 0.00000000 | 0.76310000  | -0.46965900 |

TS<sub>IV.v</sub>

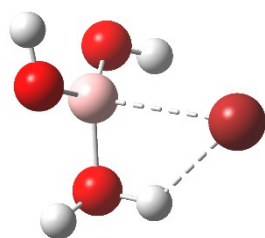

Method: IEFPCM(1,4-dioxane)-B3LYP-GD3BJ/6-311+G(d,p)

Electronic Energy (EE) = -2827.3246 Hartree  
Zero-point Energy Correction = 0.058752 Hartree  
Thermal Correction to Energy = 0.065533 Hartree  
Thermal Correction to Enthalpy = 0.066524 Hartree  
Thermal Correction to Free Energy = 0.026052 Hartree  
EE + Zero-point Energy = -2827.2658 Hartree  
EE + Thermal Energy Correction = -2827.259 Hartree  
EE + Thermal Enthalpy Correction = -2827.258 Hartree  
EE + Thermal Free Energy Correction = -2827.2985 Hartree

|    |             |             |             |
|----|-------------|-------------|-------------|
| B  | -1.26535800 | 0.11501500  | 0.00910900  |
| O  | -1.50670400 | 1.26646100  | -0.65642600 |
| H  | -0.90887900 | 1.45281700  | -1.38745300 |
| O  | -1.79977100 | -0.21210000 | 1.20788700  |
| H  | -2.04201900 | 0.54758700  | 1.74781200  |
| Br | 1.31386000  | 0.04659300  | 0.08689300  |
| O  | -1.09065500 | -1.18065100 | -0.83137600 |
| H  | -1.45162700 | -1.95368700 | -0.36410300 |
| H  | -0.07874700 | -1.24222000 | -0.84372500 |

TS<sub>IVa-Va</sub>

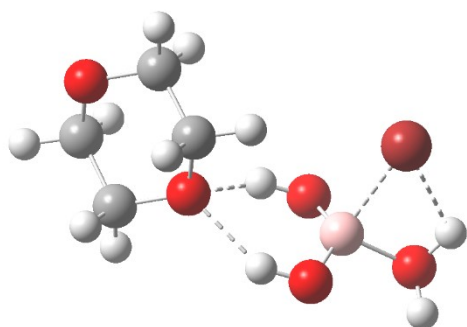

Method: IEFPCM(1,4-dioxane)-B3LYP-GD3BJ/6-311+G(d,p)

Electronic Energy (EE) = -3135.1143 Hartree  
Zero-point Energy Correction = 0.18375 Hartree  
Thermal Correction to Energy = 0.197926 Hartree  
Thermal Correction to Enthalpy = 0.198917 Hartree  
Thermal Correction to Free Energy = 0.138498 Hartree  
EE + Zero-point Energy = -3134.9306 Hartree  
EE + Thermal Energy Correction = -3134.9164 Hartree  
EE + Thermal Enthalpy Correction = -3134.9154 Hartree  
EE + Thermal Free Energy Correction = -3134.9758 Hartree

|    |             |             |             |
|----|-------------|-------------|-------------|
| B  | 1.40422100  | 1.12764900  | 0.12375800  |
| O  | 0.64382100  | 1.17577100  | 1.25304600  |
| H  | -0.27853200 | 0.97345900  | 1.02775400  |
| O  | 1.03144100  | 1.51328500  | -1.13541300 |
| H  | 0.07671000  | 1.38078700  | -1.25668600 |
| Br | 2.26624800  | -1.12058400 | -0.01331100 |
| O  | 2.84638700  | 1.68832100  | 0.40552100  |
| H  | 3.17597500  | 2.15495000  | -0.38101600 |
| H  | 3.38960100  | 0.87411700  | 0.53035200  |
| C  | -1.63939000 | -0.80849600 | -0.76361600 |
| C  | -2.83882000 | 1.21924100  | -0.42098200 |
| C  | -3.72466200 | 0.50588200  | 0.58693300  |
| C  | -2.54060400 | -1.49336800 | 0.24658300  |
| H  | -2.68066600 | 2.26211300  | -0.14267200 |
| H  | -2.04097500 | -0.91876200 | -1.77716500 |
| H  | -0.62411600 | -1.20475700 | -0.72564200 |
| H  | -3.31286300 | 0.62967000  | 1.59871400  |
| H  | -4.73566300 | 0.91532200  | 0.56539800  |
| H  | -2.08562500 | -1.44900800 | 1.24558100  |
| H  | -2.69220900 | -2.53872500 | -0.02450900 |
| H  | -3.28326500 | 1.17363900  | -1.42195300 |
| O  | -3.82967900 | -0.87976800 | 0.27480600  |
| O  | -1.54038200 | 0.60112100  | -0.45853200 |

## HBr

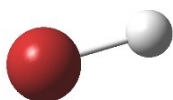

Method: IEFPCM(1,4-dioxane)-B3LYP-GD3BJ/6-311+G(d,p)

Electronic Energy (EE) = -2574.7551 Hartree  
Zero-point Energy Correction = 0.005926 Hartree  
Thermal Correction to Energy = 0.008404 Hartree  
Thermal Correction to Enthalpy = 0.009395 Hartree  
Thermal Correction to Free Energy = -0.014432 Hartree  
EE + Zero-point Energy = -2574.7491 Hartree  
EE + Thermal Energy Correction = -2574.7467 Hartree  
EE + Thermal Enthalpy Correction = -2574.7457 Hartree  
EE + Thermal Free Energy Correction = -2574.7695 Hartree

|    |            |            |             |
|----|------------|------------|-------------|
| Br | 0.00000000 | 0.00000000 | 0.03967000  |
| H  | 0.00000000 | 0.00000000 | -1.38844500 |

## Boronic acid (V)

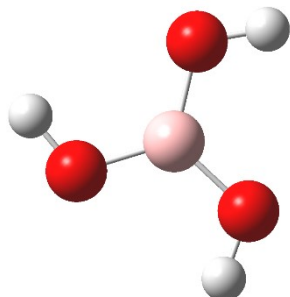

Method: IEFPCM(1,4-dioxane)-B3LYP-GD3BJ/6-311+G(d,p)

Electronic Energy (EE) = -252.5948 Hartree  
Zero-point Energy Correction = 0.048649 Hartree  
Thermal Correction to Energy = 0.053424 Hartree  
Thermal Correction to Enthalpy = 0.054415 Hartree  
Thermal Correction to Free Energy = 0.020616 Hartree  
EE + Zero-point Energy = -252.54615 Hartree  
EE + Thermal Energy Correction = -252.54138 Hartree  
EE + Thermal Enthalpy Correction = -252.54039 Hartree  
EE + Thermal Free Energy Correction = -252.57419 Hartree

|   |             |             |            |
|---|-------------|-------------|------------|
| B | -0.00006700 | -0.00002400 | 0.00002000 |
| O | 0.30966100  | 1.33429300  | 0.00001300 |

|   |             |             |             |
|---|-------------|-------------|-------------|
| H | 1.25788600  | 1.49850100  | -0.00017200 |
| O | -1.31046300 | -0.39902200 | -0.00003100 |
| H | -1.92698000 | 0.33990000  | 0.00013100  |
| O | 1.00080700  | -0.93522100 | 0.00001900  |
| H | 0.66939700  | -1.83869100 | -0.00006100 |

Va

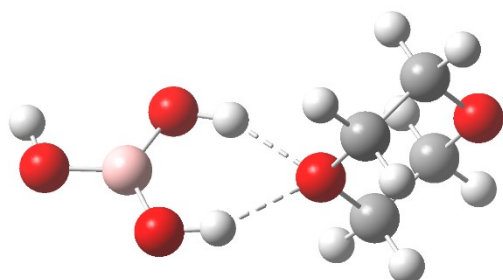

Method: IEFPCM(1,4-dioxane)-B3LYP-GD3BJ/6-311+G(d,p)

Electronic Energy (EE) = -560.38027 Hartree  
 Zero-point Energy Correction = 0.173285 Hartree  
 Thermal Correction to Energy = 0.185316 Hartree  
 Thermal Correction to Enthalpy = 0.186308 Hartree  
 Thermal Correction to Free Energy = 0.131184 Hartree  
 EE + Zero-point Energy = -560.20699 Hartree  
 EE + Thermal Energy Correction = -560.19496 Hartree  
 EE + Thermal Enthalpy Correction = -560.19397 Hartree  
 EE + Thermal Free Energy Correction = -560.24909 Hartree

|   |             |             |             |
|---|-------------|-------------|-------------|
| B | -2.72011500 | 0.00001300  | -0.09877500 |
| O | -2.31095400 | -0.00028000 | 1.20832600  |
| H | -1.34394200 | -0.00028400 | 1.27366700  |
| O | -1.84911900 | 0.00024300  | -1.16652400 |
| H | -0.92584900 | 0.00015900  | -0.86780000 |
| C | 1.24651400  | -1.18965900 | 0.60300600  |
| C | 1.24646600  | 1.18942800  | 0.60343100  |
| C | 2.33952800  | 1.17450600  | -0.45104000 |
| C | 2.33958600  | -1.17431800 | -0.45145000 |
| H | 0.57150700  | 2.03501200  | 0.46623700  |
| H | 1.68080000  | -1.23140300 | 1.60822800  |
| H | 0.57159000  | -2.03522000 | 0.46550400  |
| H | 1.89193300  | 1.21934000  | -1.45374900 |
| H | 3.00682000  | 2.02782100  | -0.32352900 |
| H | 1.89200900  | -1.21883300 | -1.45418100 |
| H | 3.00691900  | -2.02764400 | -0.32422200 |
| H | 1.68075700  | 1.23082800  | 1.60866400  |
| O | 3.13908000  | 0.00009300  | -0.33113800 |
| O | 0.44143700  | -0.00011200 | 0.49347300  |
| O | -4.07009700 | 0.00007600  | -0.33561100 |

H            -4.26730400   0.00026800   -1.27682600

### Tentative TS for the reaction of residual water with a bromine radical

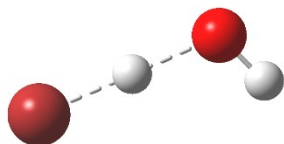

Method: IEFPCM(1,4-dioxane)-UB3LYP-GD3BJ/6-311+G(d,p)

Electronic Energy (EE) = -2650.5218 Hartree  
Zero-point Energy Correction = 0.01555 Hartree  
Thermal Correction to Energy = 0.019134 Hartree  
Thermal Correction to Enthalpy = 0.020125 Hartree  
Thermal Correction to Free Energy = -0.01186 Hartree  
EE + Zero-point Energy = -2650.5063 Hartree  
EE + Thermal Energy Correction = -2650.5027 Hartree  
EE + Thermal Enthalpy Correction = -2650.5017 Hartree  
EE + Thermal Free Energy Correction = -2650.5337 Hartree

|    |             |             |            |
|----|-------------|-------------|------------|
| O  | 0.02055800  | 2.34073900  | 0.00000000 |
| H  | -0.89918400 | 2.67102800  | 0.00000000 |
| H  | 0.01518300  | 0.89862500  | 0.00000000 |
| Br | 0.02055800  | -0.63701600 | 0.00000000 |

### Pinacol cyclopentyl boronate

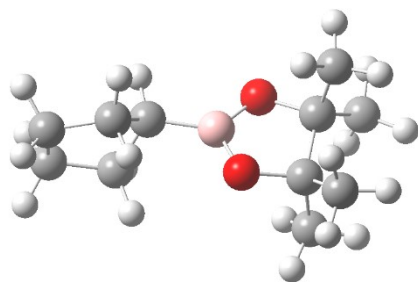

Method: IEFPCM(1,4-dioxane)-B3LYP-GD3BJ/6-311+G(d,p)

Electronic Energy (EE) = -607.47124 Hartree  
 Zero-point Energy Correction = 0.311136 Hartree  
 Thermal Correction to Energy = 0.327687 Hartree  
 Thermal Correction to Enthalpy = 0.328678 Hartree  
 Thermal Correction to Free Energy = 0.264618 Hartree  
 EE + Zero-point Energy = -607.1601 Hartree  
 EE + Thermal Energy Correction = -607.14355 Hartree  
 EE + Thermal Enthalpy Correction = -607.14256 Hartree  
 EE + Thermal Free Energy Correction = -607.20662 Hartree

|   |             |             |             |
|---|-------------|-------------|-------------|
| B | -0.25078100 | 0.31045900  | -0.11322000 |
| O | 0.30819200  | -0.65401700 | 0.69212800  |
| O | 0.69460500  | 1.02382900  | -0.80934900 |
| C | -1.79171500 | 0.52989100  | -0.24034300 |
| C | -2.50573700 | -0.60398600 | -1.01686600 |
| C | -2.56527600 | 0.52603800  | 1.09602800  |
| H | -1.98585300 | 1.47613900  | -0.76069900 |
| C | -4.00260400 | -0.42440500 | -0.67897000 |
| H | -2.14976500 | -1.57156500 | -0.64742100 |
| H | -2.30862800 | -0.57150300 | -2.09115600 |
| C | -4.04171600 | 0.29566100  | 0.69900000  |
| H | -2.42295600 | 1.44506600  | 1.67013200  |
| H | -2.20653300 | -0.30233000 | 1.71479500  |
| H | -4.48692800 | 0.19135200  | -1.44150900 |
| H | -4.52954800 | -1.38127900 | -0.66128900 |
| H | -4.56361300 | 1.25217800  | 0.61115100  |
| H | -4.57420400 | -0.28768800 | 1.45381400  |
| C | 1.72069900  | -0.75979200 | 0.34398900  |
| C | 2.00833600  | 0.64619200  | -0.29590200 |
| C | 2.51524300  | -1.06542200 | 1.60508400  |
| H | 2.24063500  | -2.05353400 | 1.97976900  |
| H | 3.58722400  | -1.06866900 | 1.39091300  |
| H | 2.31739100  | -0.33619800 | 2.38972600  |
| C | 1.84165600  | -1.91290800 | -0.65396200 |
| H | 2.88297600  | -2.09695700 | -0.92614400 |
| H | 1.43948400  | -2.81825100 | -0.19556600 |
| H | 1.27368000  | -1.71060600 | -1.56414400 |
| C | 2.39933900  | 1.70841100  | 0.73286300  |
| H | 3.40183100  | 1.53021000  | 1.12752200  |
| H | 2.38758100  | 2.68740000  | 0.25024400  |
| H | 1.69496100  | 1.73047700  | 1.56665900  |
| C | 3.00061200  | 0.63507800  | -1.44940700 |
| H | 3.12751000  | 1.64955800  | -1.83265100 |
| H | 3.97606500  | 0.27440000  | -1.11235900 |
| H | 2.65719500  | 0.00246400  | -2.26700800 |

TS employing pinacol pentenyl boronate

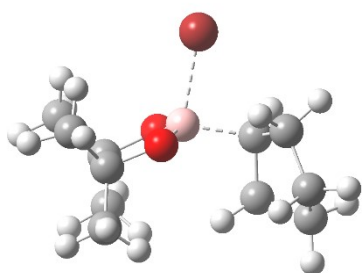

Method: IEFPCM(1,4-dioxane)-UB3LYP-GD3BJ/6-311+G(d,p)

Electronic Energy (EE) = -3181.5124 Hartree  
 Zero-point Energy Correction = 0.304926 Hartree  
 Thermal Correction to Energy = 0.32048 Hartree  
 Thermal Correction to Enthalpy = 0.321471 Hartree  
 Thermal Correction to Free Energy = 0.259203 Hartree  
 EE + Zero-point Energy = -3181.2074 Hartree  
 EE + Thermal Energy Correction = -3181.1919 Hartree  
 EE + Thermal Enthalpy Correction = -3181.1909 Hartree  
 EE + Thermal Free Energy Correction = -3181.2532 Hartree

|    |             |             |             |
|----|-------------|-------------|-------------|
| B  | 0.01453900  | 0.17693400  | -0.18024500 |
| O  | -0.26452300 | -0.28622800 | 1.08439300  |
| O  | -0.82276000 | -0.00132000 | -1.25725200 |
| C  | 1.71848700  | -0.10990000 | -0.62274100 |
| C  | 2.71720900  | 0.04727800  | 0.53391100  |
| C  | 1.68271100  | -1.60753600 | -1.00976700 |
| H  | 1.93609600  | 0.52153800  | -1.47800100 |
| C  | 3.30972900  | -1.36212100 | 0.75343100  |
| H  | 2.24587700  | 0.43377400  | 1.43658300  |
| H  | 3.48867800  | 0.76716400  | 0.24687300  |
| C  | 3.08545600  | -2.08148000 | -0.58556300 |
| H  | 1.45546300  | -1.73757700 | -2.06782900 |
| H  | 0.93667100  | -2.15901300 | -0.43305000 |
| H  | 4.35953100  | -1.33228400 | 1.05184500  |
| H  | 2.75662500  | -1.87913900 | 1.54320400  |
| H  | 3.82840400  | -1.75569000 | -1.32092500 |
| H  | 3.14190300  | -3.17053200 | -0.50966000 |
| Br | 0.44015900  | 2.42555100  | -0.04158700 |
| C  | -2.05454400 | -0.60286700 | -0.85012900 |
| C  | -3.22894400 | 0.34875700  | -1.14474500 |
| H  | -3.29120100 | 0.52283100  | -2.19865300 |
| H  | -4.14096200 | -0.09340100 | -0.80178800 |
| H  | -3.07064700 | 1.27803200  | -0.63849500 |
| C  | -2.15675900 | -1.84133300 | -1.75971900 |
| H  | -3.07234700 | -2.35714500 | -1.55838000 |
| H  | -2.13854200 | -1.53376700 | -2.78440000 |
| H  | -1.33040800 | -2.49358100 | -1.56836400 |



|   |             |             |            |
|---|-------------|-------------|------------|
| C | -1.58793300 | -0.82280100 | 1.15905600 |
| C | -1.55030600 | -2.27851500 | 1.66013600 |
| H | -1.28301700 | -2.29232000 | 2.69612200 |
| H | -2.51507400 | -2.72393300 | 1.53473800 |
| H | -0.82668400 | -2.83072700 | 1.09770200 |
| C | -2.26660700 | 0.06690400  | 2.21708600 |
| H | -3.29485700 | -0.21333700 | 2.31231200 |
| H | -1.77387100 | -0.05934300 | 3.15845400 |
| H | -2.20263900 | 1.09156200  | 1.91561800 |

## References

1. Primer, D. N., Karakaya, I., Tellis, J. C. & Molander, G. A. Single-electron transmetalation: An enabling technology for secondary alkylboron cross-coupling. *J Am Chem Soc* **137**, 2195–2198 (2015).
2. Zuo, Z. & Macmillan, D. W. C. Decarboxylative arylation of  $\alpha$ -Amino acids via photoredox catalysis: A one-step conversion of biomass to drug pharmacophore. *J Am Chem Soc* **136**, 5257–5260 (2014).
3. Luridiana, A. *et al.* The Merger of Benzophenone HAT Photocatalysis and Silyl Radical-Induced XAT Enables Both Nickel-Catalyzed Cross-Electrophile Coupling and 1,2-Dicarbonylfunctionalization of Olefins. *ACS Catal* **12**, 11216–11225 (2022).
4. Campbell, P. S., Jamieson, C., Simpson, I. & Watson, A. J. B. Practical synthesis of pharmaceutically relevant molecules enriched in  $sp^3$  character. *Chemical Communications* **54**, 46–49 (2017).
5. Yadav, C., Maka, V. K., Payra, S. & Moorthy, J. N. Multifunctional porous organic polymers (POPs): Inverse adsorption of hydrogen over nitrogen, stabilization of Pd(0) nanoparticles, and catalytic cross-coupling reactions and reductions. *J Catal* **384**, 61–71 (2020).
6. Huang, L., Kancherla, R. & Rueping, M. Nickel Catalyzed Regiodivergent Cross-Coupling Alkylation of Aryl Halides with Redox-Active Imines. *ACS Catal* **12**, 11563–11572 (2022).
7. Lv, X. Y., Abrams, R. & Martin, R. Dihydroquinazolinones as adaptative  $C(sp^3)$  handles in arylations and alkylations via dual catalytic C–C bond-functionalization. *Nature Communications* **2022 13:1** **13**, 1–8 (2022).
8. Meng, Q. Y., Schirmer, T. E., Katou, K. & König, B. Controllable Isomerization of Alkenes by Dual Visible-Light-Cobalt Catalysis. *Angewandte Chemie - International Edition* **58**, 5723–5728 (2019).
9. Cong, F., Lv, X. Y., Day, C. S. & Martin, R. Dual Catalytic Strategy for Forging  $sp^2$ - $sp^3$  and  $sp^3$ - $sp^3$  Architectures via  $\beta$ -Scission of Aliphatic Alcohol Derivatives. *J Am Chem Soc* **142**, 20594–20599 (2020).
10. Abdiaj, I. & Alcázar, J. Improving the throughput of batch photochemical reactions using flow: Dual photoredox and nickel catalysis in flow for  $C(sp^2)C(sp^3)$  cross-coupling. *Bioorg Med Chem* **25**, 6190–6196 (2017).
11. Gong, Y. *et al.* Nickel-Catalyzed Thermal Redox Functionalization of  $C(sp^3)$ -H Bonds with Carbon Electrophiles. *Angewandte Chemie International Edition* **61**, e202201662 (2022).

12. Qin, J., Zhou, Z., Cui, T., Hemming, M. & Meggers, E. Enantioselective intramolecular C–H amination of aliphatic azides by dual ruthenium and phosphine catalysis. *Chem Sci* **10**, 3202–3207 (2019).
13. Luo, J. & Zhang, J. Donor-Acceptor Fluorophores for Visible-Light-Promoted Organic Synthesis: Photoredox/Ni Dual Catalytic C(sp<sup>3</sup>)-C(sp<sup>2</sup>) Cross-Coupling. *ACS Catal* **6**, 873–877 (2016).
14. Chen, Y., Wang, X., He, X., An, Q. & Zuo, Z. Photocatalytic Dehydroxymethylative Arylation by Synergistic Cerium and Nickel Catalysis. *J Am Chem Soc* **143**, 4896–4902 (2021).
15. Shaw, M. H., Shurtleff, V. W., Terrett, J. A., Cuthbertson, J. D. & MacMillan, D. W. C. Native functionality in triple catalytic cross-coupling: sp<sup>3</sup> C-H bonds as latent nucleophiles. *Science* (1979) **352**, 1304–1308 (2016).
16. Llaveria, J., Leonori, D. & Aggarwal, V. K. Stereospecific Coupling of Boronic Esters with N-Heteroaromatic Compounds. *J Am Chem Soc* **137**, 10958–10961 (2015).
17. Yin, H., Zhao, C., You, H., Lin, K. & Gong, H. Mild ketone formation via Ni-catalyzed reductive coupling of unactivated alkyl halides with acid anhydrides. *Chemical Communications* **48**, 7034–7036 (2012).
18. Xi, X. *et al.* From Esters to Ketones via a Photoredox-Assisted Reductive Acyl Cross-Coupling Strategy. *Angewandte Chemie International Edition* **61**, e202114731 (2022).
19. Allwood, D. M., Blakemore, D. C. & Ley, S. V. Preparation of unsymmetrical ketones from tosylhydrazones and aromatic aldehydes via formyl C-H bond insertion. *Org Lett* **16**, 3064–3067 (2014).
20. Liu, W. C. *et al.* Energy-Transfer-Enabled Radical Acylation Using Free Alkyl Boronic Acids through Photo and NHC Dual Catalysis. *ACS Catal* **14**, 3181–3190 (2024).
21. Gaussian 16, Revision C.01, Frisch, M. J.; Trucks, G. W.; Schlegel, H. B.; Scuseria, G. E.; Robb, M. A.; Cheeseman, J. R.; Scalmani, G.; Barone, V.; Petersson, G. A.; Nakatsuji, H.; Li, X.; Caricato, M.; Marenich, A. V.; Bloino, J.; Janesko, B. G.; Gomperts, R.; Mennucci, B.; Hratchian, H. P.; Ortiz, J. V.; Izmaylov, A. F.; Sonnenberg, J. L.; Williams-Young, D.; Ding, F.; Lipparini, F.; Egidi, F.; Goings, J.; Peng, B.; Petrone, A.; Henderson, T.; Ranasinghe, D.; Zakrzewski, V. G.; Gao, J.; Rega, N.; Zheng, G.; Liang, W.; Hada, M.; Ehara, M.; Toyota, K.; Fukuda, R.; Hasegawa, J.; Ishida, M.; Nakajima, T.; Honda, Y.; Kitao, O.; Nakai, H.; Vreven, T.; Throssell, K.; Montgomery, Jr., J. A.; Peralta, J. E.; Ogliaro, F.; Bearpark, M. J.; Heyd, J. J.; Brothers, E. N.; Kudin, K. N.; Staroverov, V. N.; Keith, T. A.; Kobayashi, R.; Normand, J.; Raghavachari, K.; Rendell, A. P.; Burant, J. C.; Iyengar, S. S.; Tomasi, J.; Cossi, M.; Millam, J. M.; Klene, M.; Adamo, C.; Cammi, R.; Ochterski, J. W.; Martin, R. L.; Morokuma, K.; Farkas, O.; Foresman, J. B.; Fox, D. J. Gaussian, Inc., Wallingford CT, **2019**.
22. Becke, A. D. *J. Chem. Phys.*, **1993**, *98*, 5648-5652.
23. Ditchfield, R.; Hehre, W. J.; Pople, J. A. *J. Chem. Phys.*, **1971**, *54*, 724-728; Hehre, W. J. Ditchfield, R.; Pople, J. A. *J. Chem. Phys.*, **1972**, *56*, 2257-2261; Hariharan, P. C.; Pople, J.

- A. *Theor. Chem. Acc.*, **1973**, *28*, 213-222.
24. Raghavachari, K.; Binkley, J. S.; Seeger, R.; Pople, J. A. *J. Chem. Phys.*, **1980**, *72*, 650-654, Clark, T.; Chandrasekhar, J.; Spitznagel, G. W.; Schleyer, P. V. R. *J. Comp. Chem.*, **1983**, *4*, 294-301; Frisch, M. J.; Pople, J. A.; Binkley, J. S. *J. Chem. Phys.*, **1984**, *80*, 3265-3269.
25. S. Grimme, S.; Ehrlich, S.; Goerigk, L. *J. Comp. Chem.*, **2011**, *32*, 1456-1465.
